# Supplementary material for: The effects of chronic and acute physical activity on working memory performance in healthy participants: a systematic review with meta-analysis of randomized controlled trials
Source: PubMed Central journal article supplement (PMC5493123; doi:10.1186/s13643-017-0514-7), 2017-06-30
Supplement: 13643_2017_514_MOESM3_ESM.pdf [file 13643_2017_514_MOESM3_ESM.pdf]

| Citation                   | Physical Activity Mean, SD                                                             | Total (N)                    | Control Mean, SD                                                                      | Total (N)                    | Working Memory Instrument(s)                                                                     |
|----------------------------|----------------------------------------------------------------------------------------|------------------------------|---------------------------------------------------------------------------------------|------------------------------|--------------------------------------------------------------------------------------------------|
| Brown, 2009                | DS-F post: 7.2 (2.1)<br>DS-B post: 6.2 (2.1)                                           | 66                           | NEC DS-F post: 6.6 (2.1)<br>NEC DS-B post: 5.5 (1.6)                                  | 34                           | WAIS-R Digit Span Forward<br>WAIS-R Digit Span Backward                                          |
| Budde, 2009 <sup>1</sup>   | LDS LP post: 12.15 (9.13)                                                              | LP: 20                       | LDS LP post: 12.82 (3.62)                                                             | LP: 11                       | Letter Digit Span                                                                                |
|                            | LDS HP post: 14.04 (7.27)                                                              | HP: 18                       | LDS HP post: 14.30 (2.67)                                                             | HP: 10                       |                                                                                                  |
| Chang, 2011                | Correct score post: 5.90 (2.77)                                                        | 20                           | Correct score post: 4.95 (3.11)                                                       | 22                           | Tower of London                                                                                  |
| Fisher, 2011               | Spatial working memory errors post: 64 (14)                                            | 33                           | Spatial working memory errors post: 67 (10)                                           | 27                           | CANTAB Spatial Working Memory Errors                                                             |
| Hariprasad, 2013           | DS-F post: 7.77 (1.31)<br>DS-B post: 5.30 (1.23)                                       | 87                           | DS-F post: 6.84 (1.66)<br>DS-B post: 4.51 (1.70)                                      | 87                           | Digit Span Backward<br>Digit Span Forward                                                        |
| Hogan, 2013                | RT post (ms): 949.11 (279)<br>AC post: .90 (0.09)                                      | 71                           | RT post (ms): 944.27 (333.62)<br>AC post: .91 (0.08)                                  | 73                           | N-back task (2-back)                                                                             |
| Chen, 2014                 | RT post: 935.79 (75.38)<br>AC % post: 77.76 (0.09)                                     | 3 <sup>rd</sup> grade:<br>17 | RT post: 1125.45 (113.19)<br>AC % post: 76.35 (0.07)                                  | 3 <sup>rd</sup> grade:<br>17 | N-back task (2-back) modified                                                                    |
|                            | RT post: 860.60 (93.46)<br>AC % post: 77.52 (0.09)                                     | 5 <sup>th</sup> grade:<br>22 | RT post: 979.71 (94.86)<br>AC % post: 77.91 (0.06)                                    | 5 <sup>th</sup> grade:<br>27 |                                                                                                  |
| Gothe, 2014                | AC % 1-back post: 0.98 (0.03)<br>AC % 2-back post: 0.87 (0.11)                         | 58                           | AC % 1-back post: 0.97 (0.06)<br>AC % 2-back post: 0.82 (0.17)                        | 50                           | N-back task (1-back and 2-back)                                                                  |
| Nouchi, 2014               | DS-F post: 5.93 (1.19)<br>DS-B post: 4.60 (1.58)                                       | 30                           | DS-F post: 5.71 (1.02)<br>DS-B post: 4.71 (1.51)                                      | 31                           | Digit Span Forward<br>Digit Span Backward                                                        |
| Vaughn, 2014               | LNS post: 16.3 (3.8)                                                                   | 25                           | LNS post: 15.2 (3)                                                                    | 23                           | Letter-Number Sequencing                                                                         |
| Bantoft, 2015              | DS-F (walk): 11.73 (2.20)<br>DS-B (walk): 7.28 (2.56)<br>LNS (walk): 11.47 (2.55)      | 45                           | DS-F (sit): 11.40 (2.24)<br>DS-B (sit): 7.22 (1.98)<br>LNS (sit): 11.49 (2.35)        | 45                           | WAIS-III Digit Span Forward<br>WAIS-III Digit Span Backward<br>WAIS-III Letter-Number Sequencing |
| Basso, 2015 <sup>2</sup>   | DST post: 20.16 (2.328)                                                                | 43                           | DST post: 19.90 (2.186)                                                               | 42                           | Digit Span Forward<br>Digit Span Backward                                                        |
| Howie, 2015 <sup>1</sup>   | DS 10 min: 18.2 (4.85)                                                                 | 94                           | DS 10 min: 17.8 (4.85)                                                                | 94                           | Digit Span modified                                                                              |
| Albinet, 2016              | Correct N-back post: 26.2 (1.8)<br>Spatial post: 26.6 (7.7)<br>Verbal post: 37.8 (7.8) | 19                           | Correct N-back post: 25.4 (2.2)<br>Spatial post: 23.4 (12)<br>Verbal post: 34.3 (9.5) | 17                           | N-back task (2-back)<br>Spatial Running Span task<br>Verbal Running Span task                    |
| Chapman, 2016 <sup>2</sup> | RST post: 2.765 (0.865)                                                                | 18                           | RST post: 3.211 (0.819)                                                               | 19                           | Reading Span Task (Daneman Carpenter)                                                            |

**Table S1.** Supplementary data regarding post-intervention scores for all included studies.

<sup>1</sup>Standard Errors reported which were transformed to Standard Deviations via Cochrane recommended methodology

<sup>2</sup>All DST scores were averaged into one score
