# Supplementary material for: The effects of chronic and acute physical activity on working memory performance in healthy participants: a systematic review with meta-analysis of randomized controlled trials
Source: PubMed Central journal article supplement (PMC5493123; doi:10.1186/s13643-017-0514-7), 2017-06-30
Supplement: 13643_2017_514_MOESM5_ESM.pdf [file 13643_2017_514_MOESM5_ESM.pdf]

| Groups                        |                | Effect size and 95% confidence interval |                |          |             |             | Test of null (2-Tail) |         | Heterogeneity |        |         |           | Tau-squared |                |          |       |
|-------------------------------|----------------|-----------------------------------------|----------------|----------|-------------|-------------|-----------------------|---------|---------------|--------|---------|-----------|-------------|----------------|----------|-------|
| Group                         | Number Studies | Point estimate                          | Standard error | Variance | Lower limit | Upper limit | Z-value               | P-value | Q-value       | df (Q) | P-value | I-squared | Tau Squared | Standard Error | Variance | Tau   |
| <b>Fixed effect analysis</b>  |                |                                         |                |          |             |             |                       |         |               |        |         |           |             |                |          |       |
| 18-64 yo                      | 3              | 0.064                                   | 0.086          | 0.007    | -0.105      | 0.233       | 0.741                 | 0.459   | 5.122         | 2      | 0.077   | 60.955    | 0.042       | 0.075          | 0.006    | 0.206 |
| 5-17 yo                       | 9              | 0.006                                   | 0.068          | 0.005    | -0.127      | 0.140       | 0.090                 | 0.928   | 3.784         | 8      | 0.876   | 0.000     | 0.000       | 0.023          | 0.001    | 0.000 |
| 65 yo and                     | 5              | 0.324                                   | 0.071          | 0.005    | 0.185       | 0.463       | 4.565                 | 0.000   | 3.915         | 4      | 0.418   | 0.000     | 0.000       | 0.020          | 0.000    | 0.000 |
| Total within                  |                |                                         |                |          |             |             |                       |         | 12.821        | 14     | 0.541   |           |             |                |          |       |
| Total between                 |                |                                         |                |          |             |             |                       |         | 11.353        | 2      | 0.003   |           |             |                |          |       |
| Overall                       | 17             | 0.135                                   | 0.043          | 0.002    | 0.052       | 0.219       | 3.169                 | 0.002   | 24.174        | 16     | 0.086   | 33.813    | 0.016       | 0.018          | 0.000    | 0.128 |
| <b>Mixed effects analysis</b> |                |                                         |                |          |             |             |                       |         |               |        |         |           |             |                |          |       |
| 18-64 yo                      | 3              | 0.016                                   | 0.157          | 0.025    | -0.292      | 0.323       | 0.100                 | 0.920   |               |        |         |           |             |                |          |       |
| 5-17 yo                       | 9              | 0.006                                   | 0.068          | 0.005    | -0.127      | 0.140       | 0.090                 | 0.928   |               |        |         |           |             |                |          |       |
| 65 yo and                     | 5              | 0.324                                   | 0.071          | 0.005    | 0.185       | 0.463       | 4.565                 | 0.000   |               |        |         |           |             |                |          |       |
| Total between                 |                |                                         |                |          |             |             |                       |         | 11.202        | 2      | 0.004   |           |             |                |          |       |
| Overall                       | 17             | 0.146                                   | 0.047          | 0.002    | 0.054       | 0.238       | 3.107                 | 0.002   |               |        |         |           |             |                |          |       |

Figure S1. Moderation analysis of age according to WHO global recommendations on physical activity for health by age.

| Groups                        |                | Effect size and 95% confidence interval |                |          |             |             | Test of null (2-Tail) |         | Heterogeneity |        |         |           | Tau-squared |                |          |       |
|-------------------------------|----------------|-----------------------------------------|----------------|----------|-------------|-------------|-----------------------|---------|---------------|--------|---------|-----------|-------------|----------------|----------|-------|
| Group                         | Number Studies | Point estimate                          | Standard error | Variance | Lower limit | Upper limit | Z-value               | P-value | Q-value       | df (Q) | P-value | I-squared | Tau Squared | Standard Error | Variance | Tau   |
| <b>Fixed effect analysis</b>  |                |                                         |                |          |             |             |                       |         |               |        |         |           |             |                |          |       |
| Low                           | 5              | 0.273                                   | 0.062          | 0.004    | 0.152       | 0.394       | 4.420                 | 0.000   | 6.451         | 4      | 0.168   | 37.994    | 0.012       | 0.023          | 0.001    | 0.111 |
| Moderate                      | 3              | -0.055                                  | 0.094          | 0.009    | -0.239      | 0.129       | -0.586                | 0.558   | 0.737         | 2      | 0.692   | 0.000     | 0.000       | 0.034          | 0.001    | 0.000 |
| Moderate to                   | 9              | 0.051                                   | 0.076          | 0.006    | -0.098      | 0.201       | 0.676                 | 0.499   | 6.696         | 8      | 0.570   | 0.000     | 0.000       | 0.028          | 0.001    | 0.000 |
| Total within                  |                |                                         |                |          |             |             |                       |         | 13.884        | 14     | 0.458   |           |             |                |          |       |
| Total between                 |                |                                         |                |          |             |             |                       |         | 10.290        | 2      | 0.006   |           |             |                |          |       |
| Overall                       | 17             | 0.135                                   | 0.043          | 0.002    | 0.052       | 0.219       | 3.169                 | 0.002   | 24.174        | 16     | 0.086   | 33.813    | 0.016       | 0.018          | 0.000    | 0.128 |
| <b>Mixed effects analysis</b> |                |                                         |                |          |             |             |                       |         |               |        |         |           |             |                |          |       |
| Low                           | 5              | 0.269                                   | 0.082          | 0.007    | 0.109       | 0.430       | 3.288                 | 0.001   |               |        |         |           |             |                |          |       |
| Moderate                      | 3              | -0.055                                  | 0.094          | 0.009    | -0.239      | 0.129       | -0.586                | 0.558   |               |        |         |           |             |                |          |       |
| Moderate to                   | 9              | 0.051                                   | 0.076          | 0.006    | -0.098      | 0.201       | 0.676                 | 0.499   |               |        |         |           |             |                |          |       |
| Total between                 |                |                                         |                |          |             |             |                       |         | 7.399         | 2      | 0.025   |           |             |                |          |       |
| Overall                       | 17             | 0.098                                   | 0.048          | 0.002    | 0.004       | 0.192       | 2.053                 | 0.040   |               |        |         |           |             |                |          |       |

Figure S2. Moderation analysis of physical activity intensity. Basso *et al.* 2015 which had a 'vigorous' intensity was grouped with 'moderate to vigorous' for purpose of practical analysis.

| Groups                        |                | Effect size and 95% confidence interval |                |          |             |             | Test of null (2-Tail) |         | Heterogeneity |        |         |           | Tau-squared |                |          |       |
|-------------------------------|----------------|-----------------------------------------|----------------|----------|-------------|-------------|-----------------------|---------|---------------|--------|---------|-----------|-------------|----------------|----------|-------|
| Group                         | Number Studies | Point estimate                          | Standard error | Variance | Lower limit | Upper limit | Z-value               | P-value | Q-value       | df (Q) | P-value | I-squared | Tau Squared | Standard Error | Variance | Tau   |
| <b>Fixed effect analysis</b>  |                |                                         |                |          |             |             |                       |         |               |        |         |           |             |                |          |       |
| Unknown                       | 11             | 0.091                                   | 0.050          | 0.003    | -0.008      | 0.190       | 1.794                 | 0.073   | 11.643        | 10     | 0.310   | 14.115    | 0.005       | 0.015          | 0.000    | 0.069 |
| Yes                           | 6              | 0.249                                   | 0.080          | 0.006    | 0.091       | 0.406       | 3.099                 | 0.002   | 9.752         | 5      | 0.083   | 48.730    | 0.047       | 0.066          | 0.004    | 0.218 |
| Total within                  |                |                                         |                |          |             |             |                       |         | 21.396        | 15     | 0.125   |           |             |                |          |       |
| Total between                 |                |                                         |                |          |             |             |                       |         | 2.778         | 1      | 0.096   |           |             |                |          |       |
| Overall                       | 17             | 0.135                                   | 0.043          | 0.002    | 0.052       | 0.219       | 3.169                 | 0.002   | 24.174        | 16     | 0.086   | 33.813    | 0.016       | 0.018          | 0.000    | 0.128 |
| <b>Mixed effects analysis</b> |                |                                         |                |          |             |             |                       |         |               |        |         |           |             |                |          |       |
| Unknown                       | 11             | 0.089                                   | 0.056          | 0.003    | -0.020      | 0.199       | 1.597                 | 0.110   |               |        |         |           |             |                |          |       |
| Yes                           | 6              | 0.138                                   | 0.134          | 0.018    | -0.124      | 0.400       | 1.032                 | 0.302   |               |        |         |           |             |                |          |       |
| Total between                 |                |                                         |                |          |             |             |                       |         | 0.114         | 1      | 0.736   |           |             |                |          |       |
| Overall                       | 17             | 0.096                                   | 0.052          | 0.003    | -0.005      | 0.197       | 1.871                 | 0.061   |               |        |         |           |             |                |          |       |

Figure S3. Moderation analysis of allocation concealment.

| Groups                        |                | Effect size and 95% confidence interval |                |          |             |             | Test of null (2-Tail) |         | Heterogeneity |        |         |           | Tau-squared |                |          |       |
|-------------------------------|----------------|-----------------------------------------|----------------|----------|-------------|-------------|-----------------------|---------|---------------|--------|---------|-----------|-------------|----------------|----------|-------|
| Group                         | Number Studies | Point estimate                          | Standard error | Variance | Lower limit | Upper limit | Z-value               | P-value | Q-value       | df (Q) | P-value | I-squared | Tau Squared | Standard Error | Variance | Tau   |
| <b>Fixed effect analysis</b>  |                |                                         |                |          |             |             |                       |         |               |        |         |           |             |                |          |       |
| No                            | 3              | 0.085                                   | 0.108          | 0.012    | -0.127      | 0.297       | 0.790                 | 0.430   | 4.789         | 2      | 0.091   | 58.241    | 0.053       | 0.093          | 0.009    | 0.231 |
| Unknown                       | 10             | 0.085                                   | 0.056          | 0.003    | -0.024      | 0.195       | 1.528                 | 0.127   | 7.181         | 9      | 0.618   | 0.000     | 0.000       | 0.016          | 0.000    | 0.000 |
| Yes                           | 4              | 0.279                                   | 0.084          | 0.007    | 0.114       | 0.443       | 3.318                 | 0.001   | 8.281         | 3      | 0.041   | 63.771    | 0.064       | 0.088          | 0.008    | 0.254 |
| Total within                  |                |                                         |                |          |             |             |                       |         | 20.251        | 14     | 0.122   |           |             |                |          |       |
| Total between                 |                |                                         |                |          |             |             |                       |         | 3.923         | 2      | 0.141   |           |             |                |          |       |
| Overall                       | 17             | 0.135                                   | 0.043          | 0.002    | 0.052       | 0.219       | 3.169                 | 0.002   | 24.174        | 16     | 0.086   | 33.813    | 0.016       | 0.018          | 0.000    | 0.128 |
| <b>Mixed effects analysis</b> |                |                                         |                |          |             |             |                       |         |               |        |         |           |             |                |          |       |
| No                            | 3              | 0.029                                   | 0.175          | 0.031    | -0.314      | 0.373       | 0.168                 | 0.866   |               |        |         |           |             |                |          |       |
| Unknown                       | 10             | 0.085                                   | 0.056          | 0.003    | -0.024      | 0.195       | 1.528                 | 0.127   |               |        |         |           |             |                |          |       |
| Yes                           | 4              | 0.175                                   | 0.163          | 0.027    | -0.144      | 0.494       | 1.076                 | 0.282   |               |        |         |           |             |                |          |       |
| Total between                 |                |                                         |                |          |             |             |                       |         | 0.401         | 2      | 0.818   |           |             |                |          |       |
| Overall                       | 17             | 0.089                                   | 0.051          | 0.003    | -0.010      | 0.189       | 1.767                 | 0.077   |               |        |         |           |             |                |          |       |

Figure S4. Moderation analysis for the presence of blinding of either participants or personnel.

| Groups                        |                | Effect size and 95% confidence interval |                |          |             |             | Test of null (2-Tail) |         | Heterogeneity |        |         |           | Tau-squared |                |          |       |
|-------------------------------|----------------|-----------------------------------------|----------------|----------|-------------|-------------|-----------------------|---------|---------------|--------|---------|-----------|-------------|----------------|----------|-------|
| Group                         | Number Studies | Point estimate                          | Standard error | Variance | Lower limit | Upper limit | Z-value               | P-value | Q-value       | df (Q) | P-value | I-squared | Tau Squared | Standard Error | Variance | Tau   |
| <b>Fixed effect analysis</b>  |                |                                         |                |          |             |             |                       |         |               |        |         |           |             |                |          |       |
| Acute                         | 9              | 0.019                                   | 0.061          | 0.004    | -0.100      | 0.138       | 0.317                 | 0.752   | 2.826         | 8      | 0.945   | 0.000     | 0.000       | 0.018          | 0.000    | 0.000 |
| Chronic                       | 8              | 0.251                                   | 0.060          | 0.004    | 0.132       | 0.369       | 4.156                 | 0.000   | 14.018        | 7      | 0.051   | 50.064    | 0.031       | 0.035          | 0.001    | 0.177 |
| Total within                  |                |                                         |                |          |             |             |                       |         | 16.844        | 15     | 0.328   |           |             |                |          |       |
| Total between                 |                |                                         |                |          |             |             |                       |         | 7.330         | 1      | 0.007   |           |             |                |          |       |
| Overall                       | 17             | 0.135                                   | 0.043          | 0.002    | 0.052       | 0.219       | 3.169                 | 0.002   | 24.174        | 16     | 0.086   | 33.813    | 0.016       | 0.018          | 0.000    | 0.128 |
| <b>Mixed effects analysis</b> |                |                                         |                |          |             |             |                       |         |               |        |         |           |             |                |          |       |
| Acute                         | 9              | 0.019                                   | 0.061          | 0.004    | -0.100      | 0.138       | 0.317                 | 0.752   |               |        |         |           |             |                |          |       |
| Chronic                       | 8              | 0.190                                   | 0.092          | 0.009    | 0.009       | 0.370       | 2.055                 | 0.040   |               |        |         |           |             |                |          |       |
| Total between                 |                |                                         |                |          |             |             |                       |         | 2.384         | 1      | 0.123   |           |             |                |          |       |
| Overall                       | 17             | 0.070                                   | 0.051          | 0.003    | -0.029      | 0.170       | 1.393                 | 0.164   |               |        |         |           |             |                |          |       |

Figure S5. Moderation analysis of intervention length of the included physical activity studies.
