# Supplementary material for: The effects of chronic and acute physical activity on working memory performance in healthy participants: a systematic review with meta-analysis of randomized controlled trials
Source: Syst Rev. 2017 Jun 30;6:124. doi: 10.1186/s13643-017-0514-7 (PMC5493123; doi:10.1186/s13643-017-0514-7)
Supplement: Supplementary file 4 — Raw screening data. (XLSX 6436 kb) [file 13643_2017_514_MOESM4_ESM.xlsx]

## Sheet: Screen 1_RCT
Title	Abstract Note	Publication Year	Date	Author	Publication Title
The older people, omega-3, and cognitive health (EPOCH) trial design and methodology: A randomised, double-blind, controlled trial investigating the effect of long-chain omega-3 fatty acids on cognitive ageing and wellbeing in cognitively healthy older adults	Abstract Background: Some studies have suggested an association between omega-3 long-chain polyunsaturated fatty acids (n -3 LC PUFAs) and better cognitive outcomes in older adults. To date, only two randomised, controlled trials have assessed the effect of n -3 LC PUFA supplementation on cognitive function in older cognitively healthy populations. Of these trials only one found a benefit, in the…	2011	2011	Danthiir, Vanessa; Burns, Nicholas R; Nettelbeck, Ted; Wilson, Carlene; Wittert, Gary	Nutrition Journal
Interim analyses from a randomised controlled trial to improve visual processing speed in older adults: the Iowa Healthy and Active Minds Study	Objectives The Iowa Healthy and Active Minds Study is a four-arm randomised controlled trial of a visual processing speed training programme (Road Tour ). This article presents the preplanned interim results immediately after training (6-8 weeks post-randomisation) for the primary outcome. Design Within two age strata (50-64 vs â[per thousand]¥65), 681 men and women attending general internal and…	2011	2011	Wolinsky, Fredric D; Vander Weg, Mark W; Howren, M Bryant; Jones, Michael P; Martin, Rene; Luger, Tana M; Duff, Kevin; Dotson, Megan M	BMJ Open
Effect of yoga or physical exercise on physical, cognitive and emotional measures in children: a randomized controlled trial	Doc number: 37 Abstract Background: Previous studies have separately reported the effects of physical exercise and yoga in children, showing physical, cognitive and emotional benefits. Objectives: The present randomized controlled trial assessed the effects of yoga or physical exercise on physical fitness, cognitive performance, self-esteem, and teacher-rated behavior and performance, in school c…	2013	2013	Telles, Shirley; Singh, Nilkamal; Bhardwaj, Abhishek Kumar; Kumar, Ankur; Balkrishna, Acharya	Child and Adolescent Psychiatry and Mental Health
Active Smarter Kids (ASK): Rationale and design of a cluster-randomized controlled trial investigating the effects of daily physical activity on childrens academic performance and risk factors for non-communicable diseases	Background Evidence is emerging from school-based studies that physical activity might favorably affect children's academic performance. However, there is a need for high-quality studies to support this. Therefore, the main objective of the Active Smarter Kids (ASK) study is to investigate the effect of daily physical activity on children's academic performance. Because of the complexity of the r…	2015	2015	Resaland, Geir K; Vegard Fusche Moe; Aadland, Eivind; Steene-Johannessen, Jostein; Glosvik, Oyvind; Andersen, John R; Kvalheim, Olav M; McKay, Heather A; Anderssen, Sigmund A	BMC Public Health
Understanding the impact of colorectal cancer education: a randomized trial of health fairs	Background Regular screening for colorectal cancer (CRC) reduces morbidity and mortality from this disease. A number of factors play a role in the underutilization of CRC screening; populations with the lowest CRC screening rates are least likely to be aware of the need for screening or have knowledge about screening options. The overall purpose of this project was to assess two methods for incre…	2015	2015	Briant, Katherine J; Wang, Lei; Holte, Sarah; Ramos, Adriana; Marchello, Nathan; Thompson, Beti	BMC Public Health
Study protocol for a cluster randomized trial of the Community of Voices choir intervention to promote the health and well-being of diverse older adults	Background Older adults are the fastest growing segment of the United States population. There is an immediate need to identify novel, cost-effective community-based approaches that promote health and well-being for older adults, particularly those from diverse racial/ethnic and socioeconomic backgrounds. Because choral singing is multi-modal (requires cognitive, physical, and psychosocial engage…	2015	2015	Johnson, Julene K; Napoles, Anna M; Stewart, Anita L; Max, Wendy B; Santoyo-Olsson, Jasmine; Freyre, Rachel; Allison, Theresa A; Gregorich, Steven E	BMC Public Health
Do cognitive measures and brain circuitry predict outcomes of exercise in Parkinson Disease: a randomized clinical trial	Background There is emerging research detailing the relationship between balance/gait/falls and cognition. Imaging studies also suggest a link between structural and functional changes in the frontal lobe (a region commonly associated with cognitive function) and mobility. People with Parkinson's disease have important changes in cognitive function that may impact rehabilitation efficacy. Our und…	2015	2015	King, LA; Peterson, D S; Mancini, M; Carlson-Kuhta, P; Fling, B W; Smulders, K; Nutt, J G; Dale, M; Carter, J; Winters-Stone, K M; Horak, F B	BMC Neurology
Efficacy of cognitive rehabilitation on psychosocial functioning in Borderline Personality Disorder: a randomized controlled trial	Background Follow-up studies revealed that subjects with borderline personality disorder (BPD) present high rates of clinical remission, although psychosocial functioning often remains impaired. The aim of this study is to evaluate the efficacy of a cognitive rehabilitation intervention versus a psychoeducational program on psychosocial functioning in subjects with BPD. Methods A multicenter, ran…	2015	2015	Pascual, Juan C; Palomares, Nerea; Ibanez, Angela; Portella, Maria J; Arza, Rocio; Reyes, Raquel; Feliu-Soler, Albert; Diaz-Marsa, Marina; Saiz-Ruiz, Jeronimo; Soler, Joaquim; Carrasco, Jose L	BMC Psychiatry
Randomized controlled trial of computer-based treatment of social cognition in schizophrenia: the TRuSST trial protocol	Background Schizophrenia is a severe and chronic medical condition, characterized by positive and negative symptoms, as well as pervasive social cognitive deficits. Despite the functional significance of the social cognition deficits affecting many aspects of daily living, such as social relationships, occupational status, and independent living, there is still no effective treatment option for t…	2015	2015	Rose, Annika; Vinogradov, Sophia; Fisher, Melissa; Green, Michael F; Ventura, Joseph; Hooker, Christine; Merzenich, Michael; Mor Nahum	BMC Psychiatry
Improving executive functioning in children with ADHD: training multiple executive functions within the context of a computer game. a randomized double-blind placebo controlled trial	INTRODUCTION: Executive functions (EFs) training interventions aimed at ADHD-symptom reduction have yielded mixed results. Generally, these interventions focus on training a single cognitive domain (e.g., working memory [WM], inhibition, or cognitive-flexibility). However, evidence suggests that most children with ADHD show deficits on multiple EFs, and that these EFs are largely related to diffe…	2015	2015	Dovis, Sebastiaan; Van der Oord, Saskia; Wiers, Reinout W.; Prins, Pier J. M.	PloS One
Benefits of virtual reality based cognitive rehabilitation through simulated activities of daily living: a randomized controlled trial with stroke patients	Background Stroke is one of the most common causes of acquired disability, leaving numerous adults with cognitive and motor impairments, and affecting patients' capability to live independently. There is substancial evidence on post-stroke cognitive rehabilitation benefits, but its implementation is generally limited by the use of paper-and-pencil methods, insufficient personalization, and subopt…	2016	2016	Faria, Ana Lucia; Andrade, Andreia; Soares, Luisa; Sergi Bermudez i Badia	Journal of Neuroengineering and Rehabilitation
Cognitive Benefits of Social Dancing and Walking in Old Age: The Dancing Mind Randomized Controlled Trial	BACKGROUND: A physically active lifestyle has the potential to prevent cognitive decline and dementia, yet the optimal type of physical activity/exercise remains unclear. Dance is of special interest as it complex sensorimotor rhythmic activity with additional cognitive, social, and affective dimensions. OBJECTIVES: To determine whether dance benefits executive function more than walking, an acti…	2016	2016	Merom, Dafna; Grunseit, Anne; Eramudugolla, Ranmalee; Jefferis, Barbara; Mcneill, Jade; Anstey, Kaarin J.	Frontiers in Aging Neuroscience
The Relieving Effects of BrainPower Advanced, a Dietary Supplement, in Older Adults with Subjective Memory Complaints: A Randomized, Double-Blind, Placebo-Controlled Trial	Subjective memory complaints (SMCs) are common in older adults that can often predict further cognitive impairment. No proven effective agents are available for SMCs. The effect of BrainPower Advanced, a dietary supplement consisting of herbal extracts, nutrients, and vitamins, was evaluated in 98 volunteers with SMCs, averaging 67 years of age (47-88), in a randomized, double-blind, placebo-cont…	2016	2016	Zhu, Jingfen; Shi, Rong; Chen, Su; Dai, Lihua; Shen, Tian; Feng, Yi; Gu, Pingping; Shariff, Mina; Nguyen, Tuong; Yeats Ye; Rao, Jianyu; Xing, Guoqiang	Evidence - Based Complementary and Alternative Medicine
Integral strategy to supportive care in breast cancer survivors through occupational therapy and a m-health system: design of a randomized clinical trial	Background Technological support using e-health mobile applications (m-health) is a promising strategy to improve the adherence to healthy lifestyles in breast cancer survivors (excess in energy intake or low physical activity are determinants of the risk of recurrence, second cancers and cancer mortality). Moreover, cancer rehabilitation programs supervised by health professionals are needed due…	2016	2016	Lozano-Lozano, Mario; Martin-Martin, Lydia; Galiano-Castillo, Noelia; Alvarez-Salvago, Francisco; Cantarero-Villanueva, Irene; Fernandez-Lao, Carolina; Sanchez-Salado, Carmen; Arroyo-Morales, Manuel	BMC Medical Informatics and Decision Making
The Building Wealth and Health Network: methods and baseline characteristics from a randomized controlled trial for families with young children participating in temporary assistance for needy families (TANF)	Background Families with children under age six participating in the Temporary Assistance for Needy Families Program (TANF) must participate in work-related activities for 20 h per week. However, due to financial hardship, poor health, and exposure to violence and adversity, families may experience great difficulty in reaching self-sufficiency. The purpose of this report is to describe study desi…	2016	2016	Sun, Jing; Patel, Falguni; Kirzner, Rachel; Newton-Famous, Nijah; Owens, Constance; Welles, Seth L; Chilton, Mariana	BMC Public Health
Multivitamins and minerals modulate whole-body energy metabolism and cerebral blood-flow during cognitive task performance: a double-blind, randomised, placebo-controlled trial	Background The brain is by far the most metabolically active organ in the body, with overall energy expenditure and local blood-supply closely related to neural activity. Both energy metabolism and cerebral vaso-dilation are dependent on adequate micronutrient status. This study investigated whether supplementation with ascending doses of multi-vitamin/minerals could modulate the metabolic and ce…	2016	2016	Kennedy, David O; Stevenson, Emma J; Jackson, Philippa A; Dunn, Sarah; Wishart, Karl; Bieri, Gregor; Barella, Luca; Carne, Alexandra; Dodd, Fiona L; Robertson, Bernadette C; Forster, Joanne; Haskell-Ramsay, Crystal F	Nutrition & Metabolism
Adaptations of Prefrontal Brain Activity, Executive Functions, and Gait in Healthy Elderly Following Exergame and Balance Training: A Randomized-Controlled Study	During aging, the prefrontal cortex (PFC) undergoes age-dependent neuronal changes influencing cognitive and motor functions. Motor-learning interventions are hypothesized to ameliorate motor and cognitive deficits in older adults. Especially, video game-based physical exercise might have the potential to train motor in combination with cognitive abilities in older adults. The aim of this study w…	2016	2016	Schättin, Alexandra; Arner, Rendel; Gennaro, Federico; de Bruin, Eling D.	Frontiers in Aging Neuroscience
Cognitive stimulation through mHealth-based program for patients with alcohol dependence syndrome: A randomized controlled study	Alcohol abuse can impact on general cognitive functioning and more particularly on frontal lobe functions. One option available to reduce this impact may rest on rehabilitation paradigms that include cognitive stimulation programmes. This paper reports on a randomized controlled study where two samples of patients with alcohol dependence syndrome where enrolled: (i) on a mHealth-based cognitive s…	2016	2016	Gamito, Pedro, PhD, DSc; Oliveira, Jorge, PhD; Lopes, Paulo, PhD; Brito, Rodrigo, PhD; Morais, Diogo; Rebelo, Sara; Silva, Diana; Cacoete, Cristiana; Deus, Alberto, PhD	Journal of Pain Management
Attentional and affective consequences of technology supported mindfulness training: a randomised, active control, efficacy trial	Background Mindfulness training (MT) programs represent an approach to attention training with well-validated mental health benefits. However, research supporting MT efficacy is based predominantly on weekly-meeting, facilitator-led, group-intervention formats. It is unknown whether participants might benefit from neurofeedback-assisted, technology-supported MT (N-tsMT), in which meditation is de…	2016	2016	Sheffy Bhayee; Tomaszewski, Patricia; Lee, Daniel H; Moffat, Graeme; Pino, Lou; Moreno, Sylvain; Farb, Norman A S	BMC Psychology
Effect of multidimensional lifestyle intervention on fitness and adiposity in predominantly migrant preschool children (Ballabeina): cluster randomised controlled trial	Objective To test the effect of a multidimensional lifestyle intervention on aerobic fitness and adiposity in predominantly migrant preschool children. Design Cluster randomised controlled single blinded trial (Ballabeina study) over one school year; randomisation was performed after stratification for linguistic region. Setting 40 preschool classes in areas with a high migrant population in the …	2011	2011-01-01	Puder, J J; Marques-Vidal, P; Schindler, C; Zahner, L; Niederer, I; Burgi, F; Ebenegger, V; Nydegger, A; Kriemler, S	BMJ : British Medical Journal (Online)
Component analysis of verbal versus spatial working memory training in adolescents with ADHD: A randomized, controlled trial.	Adaptive training of working memory (WM) using the Cogmed-RM intervention has recently shown some efficacy as an alternative treatment for ADHD, but this intervention may not be optimally designed. A recent component analysis of WM has suggested that maintenance in primary memory (PM) appears to be largely intact whereas recall from secondary memory (SM) appears to be deficient in ADHD relative t…	2011	2011-03-04	Gibson, Bradley S; Gondoli, Dawn M; Johnson, Ann C; Steeger, Christine M; Dobrzenski, Bradley A; Morrissey, Rebecca A	Child neuropsychology : a journal on normal and abnormal development in childhood and adolescence
Component Analysis of Simple Span vs. Complex Span Adaptive Working Memory Exercises: A Randomized, Controlled Trial.	There has been growing interest in using adaptive training interventions such as Cogmed-RM to increase the capacity of working memory (WM), but this intervention may not be optimally designed. For instance, Cogmed-RM can target the primary memory (PM) component of WM capacity, but not the secondary memory (SM) component. The present study hypothesized that Cogmed-RM does not target SM capacity be…	2012	2012-09-01	Gibson, Bradley S; Kronenberger, William G; Gondoli, Dawn M; Johnson, Ann C; Morrissey, Rebecca A; Steeger, Christine M	Journal of applied research in memory and cognition
A complex multimodal activity intervention to reduce the risk of dementia in mild cognitive impairment–ThinkingFit: Pilot and feasibility study for a randomized controlled trial	Background: Dementia affects 35 million people worldwide and is currently incurable. Many cases may be preventable because regular participation in physical, mental and social leisure activities during middle age is associated with up to 47% dementia risk reduction. However, the majority of middle-aged adults are not active enough. MCI is therefore a clear target for activity interventions aimed …	2014	2014-05-05	Dannhauser, Thomas M.; Cleverley, Martin; Whitfield, Tim J.; Fletcher, Ben (C).; Stevens, Tim; Walker, Zuzana	BMC Psychiatry
Behavioral Outcome Effects of Serious Gaming as an Adjunct to Treatment for Children With Attention-Deficit/Hyperactivity Disorder: A Randomized Controlled Trial	BACKGROUND: The need for accessible and motivating treatment approaches within mental health has led to the development of an Internet-based serious game intervention (called "Plan-It Commander") as an adjunct to treatment as usual for children with attention-deficit/hyperactivity disorder (ADHD). OBJECTIVE: The aim was to determine the effects of Plan-It Commander on daily life skills of childre…	2016	2016-02-16	Bul, Kim C. M.; Kato, Pamela M.; Van der Oord, Saskia; Danckaerts, Marina; Vreeke, Leonie J.; Willems, Annik; van Oers, Helga J. J.; Van Den Heuvel, Ria; Birnie, Derk; Van Amelsvoort, Thérèse A. M. J.; Franken, Ingmar H. A.; Maras, Athanasios	Journal of Medical Internet Research
Muscle, functional and cognitive adaptations after flywheel resistance training in stroke patients: a pilot randomized controlled trial	BACKGROUND: Resistance exercise (RE) improves neuromuscular function and physical performance after stroke. Yet, the effects of RE emphasizing eccentric (ECC; lengthening) actions on muscle hypertrophy and cognitive function in stroke patients are currently unknown. Thus, this study explored the effects of ECC-overload RE training on skeletal muscle size and function, and cognitive performance in…	2016	2016-04-06	Fernandez-Gonzalo, Rodrigo; Fernandez-Gonzalo, Sol; Turon, Marc; Prieto, Cristina; Tesch, Per A.; García-Carreira, Maria del Carmen	Journal of Neuroengineering and Rehabilitation
Rationale and design of a randomized controlled trial examining the effect of classroom-based physical activity on math achievement	Background: Integration of physical activity (PA) into the classroom may be an effective way of promoting the learning and academic achievement of children at elementary school. This paper describes the research design and methodology of an intervention study examining the effect of classroom-based PA on mathematical achievement, creativity, executive function, body mass index and aerobic fitness…	2016	2016-04-11	Have, Mona; Nielsen, Jacob Have; Gejl, Anne Kaer; Ernst, Martin Thomsen; Fredens, Kjeld; Stockel, Jan Toftegaard; Wedderkopp, Niels; Domazet, Sidsel Louise; Gudex, Claire; Grontved, Anders; Kristensen, Peter Lund	Bmc Public Health
A Randomized Controlled Trial of an Integrated Brain, Body, and Social Intervention for Children With ADHD	OBJECTIVE: This study evaluated the efficacy of an Integrated Brain, Body, and Social (IBBS) intervention for children with ADHD. Treatment consisted of computerized cognitive remediation training, physical exercises, and a behavior management strategy. METHOD: Ninety-two children aged 5 to 9 years with ADHD were randomly assigned to 15 weeks of IBBS or to treatment-as-usual. Primary outcome meas…	2016	2016-05-13	Smith, Stephanie D.; Vitulano, Lawrence A.; Katsovich, Liliya; Li, Shuaixing; Moore, Christina; Li, Fenghua; Grantz, Heidi; Zheng, Xixi; Eicher, Virginia; Aktan Guloksuz, Selin; Zheng, Yi; Dong, Jinxia; Sukhodolsky, Denis G.; Leckman, James F.	Journal of Attention Disorders
Acute effects of exergames on cognitive function of institutionalized older persons: a single-blinded, randomized and controlled pilot study	BACKGROUND: Improvements on balance, gait and cognition are some of the benefits of exergames. Few studies have investigated the cognitive effects of exergames in institutionalized older persons. AIMS: To assess the acute effect of a single session of exergames on cognition of institutionalized older persons. METHODS: Nineteen institutionalized older persons were randomly allocated to Wii (WG, n …	2016	2016-06-03	Monteiro-Junior, Renato Sobral; da Silva Figueiredo, Luiz Felipe; Maciel-Pinheiro, Paulo de Tarso; Abud, Erick Lohan Rodrigues; Braga, Ana Elisa Mendes Montalvão; Barca, Maria Lage; Engedal, Knut; Nascimento, Osvaldo José M.; Deslandes, Andrea Camaz; Laks, Jerson	Aging Clinical and Experimental Research
Safety and efficacy of cognitive training plus epigallocatechin-3-gallate in young adults with Down's syndrome (TESDAD): a double-blind, randomised, placebo-controlled, phase 2 trial	Early cognitive intervention is the only routine therapeutic approach used for amelioration of intellectual deficits in individuals with Down's syndrome, but its effects are limited. We hypothesised that administration of a green tea extract containing epigallocatechin-3-gallate (EGCG) would improve the effects of non-pharmacological cognitive rehabilitation in young adults with Down's syndrome. …	2016	2016-07-01	de la Torre, Rafael; de Sola, Susana; Hernandez, Gimena; Farré, Magí; Pujol, Jesus; Rodriguez, Joan; Espadaler, Josep María; Langohr, Klaus; Cuenca-Royo, Aida; Principe, Alessandro; Xicota, Laura; Janel, Nathalie; Catuara-Solarz, Silvina; Sanchez-Benavides, Gonzalo; Bléhaut, Henri; Dueñas-Espín, Iván; del Hoyo, Laura; Benejam, Bessy; Blanco-Hinojo, Laura; Videla, Sebastiá; Fitó, Montserrat; Delab…	The Lancet Neurology
Distinct Brain and Behavioral Benefits from Cognitive vs. Physical Training: A Randomized Trial in Aging Adults	Insidious declines in normal aging are well-established. Emerging evidence suggests that non-pharmacological interventions, specifically cognitive and physical training, may counter diminishing age-related cognitive and brain functions. This randomized trial compared effects of two training protocols: cognitive training (CT) vs. physical training (PT) on cognition and brain function in adults 56-…	2016	2016-07-18	Chapman, Sandra B.; Aslan, Sina; Spence, Jeffrey S.; Keebler, Molly W.; DeFina, Laura F.; Didehbani, Nyaz; Perez, Alison M.; Lu, Hanzhang; D'Esposito, Mark	Frontiers in Human Neuroscience
The Effect of Light-Intensity Cycling on Mood and Working Memory in Response to a Randomized, Placebo-Controlled Design	OBJECTIVE: Prior attempts to measure psychological responses to exercise are potentially limited by a failure to account for participants' expectations, the absence of a valid exercise placebo, and demand characteristics. The purpose of this study was to explore the main and interactive effects of a manipulation designed to increase expectations about the psychological benefits of an acute bout o…	2016	2016-08-20	Lindheimer, Jacob B.; OʼConnor, Patrick J.; McCully, Kevin K.; Dishman, Rod K.	Psychosomatic Medicine
An RCT into the effects of neurofeedback on neurocognitive functioning compared to stimulant medication and physical activity in children with ADHD	Neurofeedback (NFB) is a potential alternative treatment for children with ADHD that aims to optimize brain activity. Whereas most studies into NFB have investigated behavioral effects, less attention has been paid to the effects on neurocognitive functioning. The present randomized controlled trial (RCT) compared neurocognitive effects of NFB to (1) optimally titrated methylphenidate (MPH) and (…	2016	2016-09-24	Geladé, Katleen; Bink, Marleen; Janssen, Tieme W. P.; van Mourik, Rosa; Maras, Athanasios; Oosterlaan, Jaap	European Child & Adolescent Psychiatry
Randomized controlled trial of a web-based multi-modal therapy program for executive functioning in children and adolescents with unilateral cerebral palsy	Purpose state: Determine the efficacy of Move-it-to-improve-it (Mitii™), a multi-modal web-based program, in improving Executive Function (EF) in children with unilateral cerebral palsy (UCP). METHOD: Participants (n = 102) were matched in pairs then randomized to: intervention (Mitii™ for 20 weeks; n = 51; 26 males; mean age = 11 years 8 months (SD = 2 years 4 months); Full Scale IQ = 84.65 (SD …	2016	2016-09-24	M Piovesana, Adina; Ross, Stephanie; Lloyd, Owen; Whittingham, Koa; Ziviani, Jenny; Ware, Robert S.; Boyd, Roslyn N.	Disability and Rehabilitation
Adaptive vs. non-adaptive cognitive training by means of a personalized App: a randomized trial in people with multiple sclerosis.	Cognitive impairment is common in multiple sclerosis (MS), but the definition of the best cognitive rehabilitation tools and features is still an open issue among researchers. The aims of the present study were to evaluate the effectiveness of COGNI-TRAcK (a customized application software delivering personalized working memory-based exercises) on cognitively impaired people with MS and to invest…	2016	2016-10-04	Pedullà, Ludovico; Brichetto, Giampaolo; Tacchino, Andrea; Vassallo, Claudio; Zaratin, Paola; Battaglia, Mario Alberto; Bonzano, Laura; Bove, Marco	Journal of neuroengineering and rehabilitation
Can brain games help smokers quit?: Results of a randomized clinical trial	BACKGROUND AND AIMS: Deficits in cognitive function are observed during nicotine withdrawal and present a challenge to successful smoking cessation. This clinical trial evaluated a cognitive exercise training (CT) program to improve smoking cessation rates. METHODS: Adult treatment-seeking smokers (n=213) were randomized to receive nicotine patch therapy and 12 weeks of either computerized CT or …	2016	2016-11-01	Loughead, James; Falcone, Mary; Wileyto, E. Paul; Albelda, Benjamin; Audrain-McGovern, Janet; Cao, Wen; Kurtz, Matthew M.; Gur, Ruben C.; Lerman, Caryn	Drug and Alcohol Dependence
High- and low-intensity exercise do not improve cognitive function after stroke: A randomized controlled trial	OBJECTIVE: To determine the effects of high versus low-intensity exercise on cognitive function following stroke. DESIGN: Secondary analysis from a randomized controlled trial with blinded assessors. SUBJECTS: 50-80 years old, living in the community, > 1 year post-stroke. METHODS: Participants were randomized into a high-intensity Aerobic Exercise or low-intensity non-aerobic Balance/Flexibility…	2016	2016-11-11	Tang, Ada; Eng, Janice J.; Krassioukov, Andrei V.; Tsang, Teresa S. M.; Liu-Ambrose, Teresa	Journal of Rehabilitation Medicine
A randomised-controlled trial of the effects of very low-carbohydrate and high-carbohydrate diets on cognitive performance in patients with type 2 diabetes	This study compared the longer-term effects of a very low-carbohydrate, high-fat diet with a high-carbohydrate, low-fat diet on cognitive performance in individuals with type 2 diabetes (T2D). In total, 115 obese adults with T2D (sixty-six males, BMI: 34·6 (sd 4·3) kg/m2, age: 58 (sd 7) years, HbA1c: 7·3 (sd 1·1) %, diabetes duration: 8 (sd 6) years) were randomised to consume either an energy-re…	2016	2016-11-23	Tay, Jeannie; Zajac, Ian T.; Thompson, Campbell H.; Luscombe-Marsh, Natalie D.; Danthiir, Vanessa; Noakes, Manny; Buckley, Jonathan D.; Wittert, Gary A.; Brinkworth, Grant D.	The British Journal of Nutrition
Computerized Working Memory Training for Children with Moderate to Severe Traumatic Brain Injury: A Double-Blind, Randomized, Placebo-Controlled Trial	Pediatric traumatic brain injury (TBI) places children at risk for deficits in working memory (WM; comprising a central executive [CE], and two storage systems: phonological loop [PL] and visuospatial sketchpad [VSSP]), which is strongly related to attention and academic skills in childhood. This study aimed to examine whether different components of WM can be improved following adaptive WM train…	2016	2016-12-01	Phillips, Natalie Lynette; Mandalis, Anna; Benson, Suzanne; Parry, Louise; Epps, Adrienne; Morrow, Angie; Lah, Suncica	Journal of Neurotrauma
Neurocognitive outcome after coronary artery bypass surgery using minimal versus conventional extracorporeal circulation: a randomised controlled pilot study	Objective Neurocognitive impairment can be a debilitating complication after cardiac surgery. The aim of this study was to assess the effect of minimal extracorporeal circulation (MECC) versus conventional extracorporeal circulation (CECC) on neurocognitive function after elective coronary artery bypass grafting (CABG) and whether this can be attributed to improved cerebral perfusion intraoperati…	2011	2011-07	Anastasiadis, Kyriakos; Argiriadou, Helena; Kosmidis, Mary H; Megari, Kalliopi; Antonitsis, Polychronis; Thomaidou, Evanthia; Aretouli, Eleni; Papakonstantinou, Christos	Heart
Improved junior paediatric prescribing skills after a short e-learning intervention: a randomised controlled trial	Objective Medication errors are common, with junior doctors accounting for the majority in acute healthcare. Paediatrics is uniquely challenging, but the evidence base to guide prescribing education is limited. The authors set out to develop a short, educationally sound, low cost e-learning resource for paediatric prescribing to improve junior doctors' prescribing skills and to evaluate its effec…	2011	2011-12	Gordon, Morris; Chandratilake, Madawa; Baker, Paul	Archives of Disease in Childhood
Repetitive transcranial magnetic stimulation combined with cognitive training is a safe and effective modality for the treatment of Alzheimer's disease: a randomized, double-blind study	Cortical excitability can be modulated using repetitive transcranial magnetic stimulation (rTMS). Previously, we showed that rTMS combined with cognitive training (rTMS-COG) has positive results in Alzheimer's disease (AD). The goal of this randomized double-blind, controlled study was to examine the safety and efficacy of rTMS-COG in AD. Fifteen AD patients received 1-h daily rTMS-COG or sham tr…	2013	2013-05	Rabey, Jose M; Dobronevsky, Evgenia; Aichenbaum, Sergio; Gonen, Ofer; Marton, Revital Gendelman; Khaigrekht, Michael	Journal of Neural Transmission
Virgin olive oil supplementation and long-term cognition: the Predimed-Navarra randomized, trial	XXXto assess the effect on cognition of a controlled intervention testing Mediterranean diets (MedDiet). XXXrandomized trial after 6.5 years of nutritional intervention. Eight primary care centers affiliated to the University of Navarra. A random subsample of 285 participants (95 randomly allocated to each of 3 groups) of the PREDIMED-NAVARRA trial. All of them were at high vascular risk (44.8% m…	2013	2013-06	Martinez-lapiscina, Elena H; Clavero, P; Toledo, E; San Julian, B; Sanchez-tainta, A; Corella, D; Lamuela-raventos, R M; Martinez, J A; Martinez-gonzalez, M Á	The Journal of Nutrition, Health & Aging
Memory and metacognition for piano melodies: Illusory advantages of fixed- over random-order practice	Some learning schedules can foster an illusion of competence, whereby the learner feels that the skill will be retained better than it actually will be. Consider fixed-order practice, in which a person practices a task repeatedly before switching to the next task (e.g., task order A, A, B, B); in contrast, in random-order practice, a person randomly alternates among two or more tasks (e.g., task …	2013	2013-08	Abushanab, Branden; Bishara, Anthony J	Memory & Cognition
Mediterranean diet improves cognition: the PREDIMED-NAVARRA randomised trial	Objective Previous observational studies reported beneficial effects of the Mediterranean diet (MedDiet) on cognitive function, but results were inconsistent. We assessed the effect on cognition of a nutritional intervention using MedDiets in comparison with a low-fat control diet. Methods We assessed 522 participants at high vascular risk (44.6% men, age 74.6 ± 5.7 years at cognitive evaluation)…	2013	2013-12	Martinez-Lapiscina, Elena H; Clavero, Pedro; Toledo, Estefania; Estruch, Ramon; Salas-Salvadó, Jordi; San Julian, Beatriz; Sanchez-Tainta, Ana; Ros, Emilio; Valls-Pedret, Cinta; Martinez-Gonzalez, Miguel a	Journal of Neurology, Neurosurgery and Psychiatry
Feasibility and efficacy of a computer-based intervention aimed at preventing reading decoding deficits among children undergoing active treatment for medulloblastoma: Results of a randomized trial	Objective: To investigate the feasibility of a computer-based reading intervention completed by patients diagnosed with a brain tumor. Methods: Patients were randomized to the intervention (n = 43) or standard of care group (n = 38). The intervention consisted of 30 sessions using Fast ForWord® exercises in a game-like format. Change in reading decoding scores over time since diagnosis was examin…	2014	2014-05	Palmer, Shawna L.; Leigh, Laurie; Ellison, Susan C.; Onar-Thomas, Arzu; Wu, Shengjie; Qaddoumi, Ibrahim; Armstrong, Gregory T.; Wright, Karen; Wetmore, Cynthia; Broniscer, Alberto; Gajjar, Amar	Journal of Pediatric Psychology
Cognitive control therapy and transcranial direct current stimulation for depression: a randomized, double-blinded, controlled trial.	Based on findings that major depressive disorder (MDD) is associated to decreased dorsolateral prefrontal cortical (DLPFC) activity; interventions that increase DLPFC activity might theoretically present antidepressant effects. Two of them are cognitive control therapy (CCT), a neurocognitive intervention that uses computer-based working memory exercises, and transcranial direct current stimulati…	2014	2014-06	Brunoni, A R; Boggio, P S; De Raedt, R; Benseñor, I M; Lotufo, P A; Namur, V; Valiengo, L C L; Vanderhasselt, M A	Journal of affective disorders
Cognitive, emotional, and social benefits of regular musical activities in early dementia: randomized controlled study.	During aging, musical activities can help maintain physical and mental health and cognitive abilities, but their rehabilitative use has not been systematically explored in persons with dementia (PWDs). Our aim was to determine the efficacy of a novel music intervention based on coaching the caregivers of PWDs to use either singing or music listening regularly as a part of everyday care. Eighty-ni…	2014	2014-08	Särkämö, Teppo; Tervaniemi, Mari; Laitinen, Sari; Numminen, Ava; Kurki, Merja; Johnson, Julene K; Rantanen, Pekka	The Gerontologist
Tango for treatment of motor and non-motor manifestations in Parkinson's disease: A randomized control study	To determine effects of Argentine tango on motor and non-motor manifestations of Parkinson's disease. Design Randomized control trial. Participants Forty patients with idiopathic Parkinson's disease. Setting Movement disorder clinic and dance studio. Intervention Two randomized groups: group (N=18) with 24 partnered tango classes, and control self-directed exercise group (N=15). Main outcomes mea…	2015	2015-04	Rios Romenets, Silvia; Anang, Julius; Fereshtehnejad, Seyed-Mohammad; Pelletier, Amelie; Postuma, Ronald	Complementary Therapies in Medicine
Working Memory Training in Post-Secondary Students with ADHD: A Randomized Controlled Study	Objectives To determine whether standard-length computerized training enhances working memory (WM), transfers to other cognitive domains and shows sustained effects, when controlling for motivation, engagement, and expectancy. Methods 97 post-secondary students (59.8% female) aged 18-35 years with Attention-Deficit/Hyperactivity Disorder, were randomized into standard-length adaptive Cogmed WM tr…	2015	2015-09	Mawjee, Karizma; Woltering, Steven; Tannock, Rosemary	PLoS One
Music Training Increases Phonological Awareness and Reading Skills in Developmental Dyslexia: A Randomized Control Trial	There is some evidence for a role of music training in boosting phonological awareness, word segmentation, working memory, as well as reading abilities in children with typical development. Poor performance in tasks requiring temporal processing, rhythm perception and sensorimotor synchronization seems to be a crucial factor underlying dyslexia in children. Interestingly, children with dyslexia s…	2015	2015-09	Flaugnacco, Elena; Lopez, Luisa; Terribili, Chiara; Montico, Marcella; Zoia, Stefania; Schön, Daniele	PLoS One
Neurodevelopmental Outcomes of Extremely Preterm Infants Randomized to Stress Dose Hydrocortisone	Objective To compare the effects of stress dose hydrocortisone therapy with placebo on survival without neurodevelopmental impairments in high-risk preterm infants. Study Design We recruited 64 extremely low birth weight (birth weight ≤1000g) infants between the ages of 10 and 21 postnatal days who were ventilator-dependent and at high-risk for bronchopulmonary dysplasia. Infants were randomized …	2015	2015-09	Parikh, Nehal A; Kennedy, Kathleen A; Lasky[dagger], Robert E; Tyson, Jon E	PLoS One
Enhancing Cognitive Abilities with Comprehensive Training: A Large, Online, Randomized, Active-Controlled Trial: e0134467	Background A variety of studies have demonstrated gains in cognitive ability following cognitive training interventions. However, other studies have not shown such gains, and questions remain regarding the efficacy of specific cognitive training interventions. Cognitive training research often involves programs made up of just one or a few exercises, targeting limited and specific cognitive endpo…	2015	2015-09	Hardy, Joseph L; Nelson, Rolf A; Thomason, Moriah E; Sternberg, Daniel A; Katovich, Kiefer; Farzin, Faraz; Scanlon, Michael	PLoS ONE
Effects of an Obesity Intervention Program on Cognitive Function in Children: A Randomized Controlled Trial	Adiposity may be associated with poorer cognitive function in children. The purpose of the study was to examine the effects of an obesity intervention on cognitive function in children. One hundred and fifteen children were randomly allocated to either the Day Camp Intervention Arm (DCIA) or the Standard Intervention Arm (SIA). Children in the DCIA participated in a 6-week day camp intervention a…	2015	2015-10	Huang, Tao; Larsen, Kristian Traberg; Jepsen, Jens Richardt Møllegaard; Møller, Niels Christian; Thorsen, Anne Kær; Mortensen, Erik Lykke; Andersen, Lars Bo	Obesity
Muscle-Derived IL-6 Is Not Regulated by IL-1 during Exercise. A Double Blind, Placebo-Controlled, Randomized Crossover Study	Exercise increases muscle derived Interleukin-6 (IL-6) leading to insulin secretion via glucagon-like peptide-1. IL-1 antagonism improves glycemia and decreases systemic inflammation including IL-6 in patients with type 2 diabetes. However, it is not known whether physiological, exercise-induced muscle-derived IL-6 is also regulated by the IL-1 system. Therefore we conducted a double blind, cross…	2015	2015-10	Nordmann, Thierry M; Seelig, Eleonora; Timper, Katharina; Cordes, Mareike; Coslovsky, Michael; Hanssen, Henner; Schmidt-Trucksäss, Arno; Donath, Marc Y	PLoS One
Fundamental movement skills in preschoolers: a randomized controlled trial targeting object control proficiency	Background Adequately developed fundamental movement skills, particularly object control dimensions, are considered essential to learn more complex movement patterns and to increase the likelihood to successfully participate in organized and non-organized sports during later years. Thus, the present randomized controlled trial aimed at improving object control dimensions at an early state in a ki…	2015	2015-11	Donath, L.; Faude, O.; Hagmann, S.; Roth, R.; Zahner, L.	Child Care Health and Development
Interactive Cognitive-Motor Step Training Improves Cognitive Risk Factors of Falling in Older Adults - A Randomized Controlled Trial	Purpose Interactive cognitive-motor training (ICMT) requires individuals to perform both gross motor movements and complex information processing. This study investigated the effectiveness of ICMT on cognitive functions associated with falls in older adults. Methods A single-blinded randomized controlled trial was conducted in community-dwelling older adults (N = 90, mean age 81.5±7) without majo…	2015	2015-12	Schoene, Daniel; Valenzuela, Trinidad; Toson, Barbara; Delbaere, Kim; Severino, Connie; Garcia, Jaime; Davies, Thomas A; Russell, Frances; Smith, Stuart T; Lord, Stephen R	PLoS One
Effects of cognitive speed of processing training on a composite neuropsychological outcome: results at one-year from the IHAMS randomized controlled trial	Background: Age-related cognitive decline is common and well-documented. Cognitive speed of processing training (SOPT) has been shown to improve trained abilities (Useful Field of View; UFOV), but transfer to individual non-trained cognitive outcomes or neuropsychological composites is sparse. We examine the effects of SOPT on a composite of six equally weighted tests - UFOV, Trail-making A and B…	2016	2016-02	Wolinsky, Fredric D; Vander Weg, Mark W; Howren, M Bryant; Jones, Michael P; Dotson, Megan M	International Psychogeriatrics
The effect of dual task and executive training on pattern of gait in older adults with balance impairment: A Randomized controlled trial	OBJECTIVE: The purpose of this study was to compare the effect of two different approaches of dual-task training and executive training on pattern of gait in older adults with balance impairment. METHODS: Thirty older adults with the mean age of 73.8 participated in the study. They scored 52 or less on the Berg Balance Scale (BBS), and walked with a self-selected gait speed of 1.1m/s or less. Par…	2016	2016-02	Azadian, Elaheh; Torbati, Hamid Reza Taheri; Kakhki, Ali Reza Saberi; Farahpour, Nader	Archives of Gerontology and Geriatrics
Motor Imagery Training on Muscle Strength and Gait Performance in Ambulant Stroke Subjects-A Randomized Clinical Trial	INTRODUCTION: The ultimate goal of physiotherapy in stroke rehabilitation is focused towards physical independence and to restore their functional ability during activities of daily living (ADLs). Motor imagery (MI) is an active process during which a specific action is reproduced within working memory without any actual movements. MI training enhances motor learning, neural reorganization and co…	2016	2016-03	Kumar, Vijaya K.; Chakrapani, M.; Kedambadi, Rakshith	Journal of clinical and diagnostic research: JCDR
Exercise as an Intervention to Reduce Study-Related Fatigue among University Students: A Two-Arm Parallel Randomized Controlled Trial	Background Many university students experience high levels of study-related fatigue. This high prevalence, and the negative impact of fatigue on health and academic performance, call for prevention and reduction of these symptoms. The primary aim of the current study was to investigate to what extent an exercise intervention is effective in reducing three indicators of study-related fatigue (emot…	2016	2016-03	Vries, Juriena Dde; Hooff, L Mvan; Geurts, Sabine AE; Kompier, Michiel AJ	PLoS One
The Comparative Effects of Risperidone Long-Acting Injection and Paliperidone Palmitate on Social Functioning in Schizophrenia: A 6-Month, Open-Label, Randomized Controlled Pilot Trial	Purpose: The aim of this study was to compare the effects of risperidone long-acting injection (RLAI) and paliperidone palmitate (PP) on non-acute-phase social functioning in patients with schizophrenia. Patients and Methods: In this 6-month pilot, open-label, randomized controlled study, 30 patients with schizophrenia who had been treated with RLAI were randomly allocated to the RLAI continuatio…	2016	2016-03	Koshikawa, Yosuke; Takekita, Yoshiteru; Kato, Masaki; Sakai, Shiho; Onohara, Ai; Sunada, Naotaka; Nishida, Keiichiro; Yoshimura, Masafumi; Fabbri, Chiara; Serretti, Alessandro; Kinoshita, Toshihiko	Neuropsychobiology
Rehabilitation of Executive Functions in Patients with Chronic Acquired Brain Injury with Goal Management Training, External Cuing, and Emotional Regulation: A Randomized Controlled Trial	Executive dysfunction is a common consequence of acquired brain injury (ABI), causing significant disability in daily life. This randomized controlled trial investigated the efficacy of Goal Management TrainingTM (GMT) in improving executive functioning in patients with chronic ABI. Seventy patients with a verified ABI and executive dysfunction were randomly allocated to GMT (n=33) or a psycho-ed…	2016	2016-04	Tornås, Sveinung; Løvstad, Marianne; Solbakk, Anne-Kristin; Evans, Jonathan; Endestad, Tor; Hol, Per Kristian; Schanke, Anne-Kristine; Stubberud, Jan	Journal of the International Neuropsychological Society : JINS
Memantine before Mastectomy Prevents Post-Surgery Pain: A Randomized, Blinded Clinical Trial in Surgical Patients	Background Neuropathic pain following surgical treatment for breast cancer with or without chemotherapy is a clinical burden and patients frequently report cognitive, emotional and quality of life impairment. A preclinical study recently showed that memantine administered before surgery may prevent neuropathic pain development and cognitive dysfunction. With a translational approach, a clinical t…	2016	2016-04	Morel, Véronique; Joly, Dominique; Villatte, Christine; Dubray, Claude; Durando, Xavier; Daulhac, Laurence; Coudert, Catherine; Roux, Delphine; Pereira, Bruno; Pickering, Gisèle	PLoS One
GLP-1 receptors exist in the parietal cortex, hypothalamus and medulla of human brains and the GLP-1 analogue liraglutide alters brain activity related to highly desirable food cues in individuals with diabetes: a crossover, randomised, placebo-controlled trial	Aims/hypothesis Liraglutide is a glucagon-like peptide-1 (GLP-1) analogue that has been demonstrated to successfully treat diabetes and promote weight loss. The mechanisms by which liraglutide confers weight loss remain to be fully clarified. Thus, we investigated whether GLP-1 receptors are expressed in human brains and whether liraglutide administration affects neural responses to food cues in …	2016	2016-05	Farr, Olivia M; Sofopoulos, Michail; Tsoukas, Michael A; Dincer, Fadime; Thakkar, Bindiya; Sahin-efe, Ayse; Filippaios, Andreas; Bowers, Jennifer; Srnka, Alexandra; Gavrieli, Anna; Ko, Byung-joon; Liakou, Chrysoula; Kanyuch, Nickole; Tseleni-balafouta, Sofia; Mantzoros, Christos S	Diabetologia
Effectiveness of a School-Based Physical Activity Intervention on Cognitive Performance in Danish Adolescents: LCoMotion--Learning, Cognition and Motion - A Cluster Randomized Controlled Trial	Background Physical activity is associated not only with health-related parameters, but also with cognitive and academic performance. However, no large scale school-based physical activity interventions have investigated effects on cognitive performance in adolescents. The aim of this study was to describe the effectiveness of a school-based physical activity intervention in enhancing cognitive p…	2016	2016-06	Tarp, Jakob; Domazet, Sidsel Louise; Froberg, Karsten; Hillman, Charles H; Andersen, Lars Bo; Bugge, Anna	PLoS One
A randomised control trial of the cognitive effects of working in a seated as opposed to a standing position in office workers	Sedentary behaviour is increasing and has been identified as a potential significant health risk, particularly for desk-based employees. The development of sit-stand workstations in the workplace is one approach to reduce sedentary behaviour. However, there is uncertainty about the effects of sit-stand workstations on cognitive functioning. A sample of 36 university staff participated in a within…	2016	2016-06	Russell, Bridget A.; Summers, Mathew J.; Tranent, Peter J.; Palmer, Matthew A.; Cooley, P. Dean; Pedersen, Scott J.	Ergonomics
Randomized controlled pilot trial of mindfulness-based stress reduction for breast and colorectal cancer survivors: effects on cancer-related cognitive impairment	Purpose Cancer-related cognitive impairment (CRCI) is a common, fatigue-related symptom that disrupts cancer survivors' quality of life. Few interventions for CRCI exist. As part of a randomized pilot study targeting cancer-related fatigue, the effects of mindfulness-based stress reduction (MBSR) on survivors' cognitive outcomes were investigated. Methods Breast and colorectal cancer survivors (n…	2016	2016-06	Johns, Shelley A; Von Ah, Diane; Brown, Linda F; Beck-coon, Kathleen; Talib, Tasneem L; Alyea, Jennifer M; Monahan, Patrick O; Tong, Yan; Wilhelm, Laura; Giesler, R Brian	Journal of Cancer Survivorship
Transcranial Direct Current Stimulation to Enhance Dual-Task Gait Training in Parkinson's Disease: A Pilot RCT	Objective To investigate the feasibility and safety of a combined anodal transcranial direct current stimulation (tDCS) and dual task gait training intervention in people with Parkinson's Disease (PD) and to provide data to support a sample size calculation for a fully powered trial should trends of effectiveness be present. Design A pilot, randomized, double-blind, sham-controlled parallel group…	2016	2016-06	Schabrun, Siobhan M; Lamont, Robyn M; Brauer, Sandra G	PLoS One
Randomized Controlled Trial of Exercise for ADHD and Disruptive Behavior Disorders	PURPOSE: The objective of this study is to test the feasibility and impact of a 10-wk after-school exercise program for children with attention deficit hyperactivity disorder and/or disruptive behavior disorders living in an urban poor community. METHODS: Children were randomized to an exercise program (n = 19) or a comparable but sedentary attention control program (n = 16). Cognitive and behavi…	2016	2016-07	Bustamante, Eduardo Esteban; Davis, Catherine Lucy; Frazier, Stacy Lynn; Rusch, Dana; Fogg, Louis F.; Atkins, Marc S.; Marquez, David Xavier	Medicine and Science in Sports and Exercise
Long-term far-transfer effects of working memory training in children with ADHD: a randomized controlled trial	ADHD affects working memory (WM) and other executive functions (EFs) and thereby negatively impacts school performance, clinical symptoms and functional impairment. The main aim of this study was to analyse the efficacy of computerized WM training (CWMT) on EF rating scales. A secondary objective was to assess its efficacy on performance-based measures of EF (PBMEF), learning, clinical symptoms a…	2016	2016-08	Bigorra, Aitana; Garolera, Maite; Guijarro, Silvina; Hervás, Amaia	European Child & Adolescent Psychiatry
Repetitive Transcranial Magnetic Stimulation Improved Symptoms of Obsessive-Compulsive Disorder, but Also Cognitive Performance: Results from a Randomized Clinical Trial with a Cross-Over Design and Sham Condition	Objective: There is some evidence that repetitive transcranial magnetic stimulation (rTMS) is an effective method of treating patients suffering from obsessive-compulsive disorder (OCD). Here, we tested the hypothesis that rTMS has a positive impact both on symptom severity and cognitive performance in such patients. Specifically, short-term verbal processing speed and flexibility were assessed. …	2016	2016-08	Jahangard, Leila; Haghighi, Mohammad; Shyayganfard, Mehran; Ahmadpanah, Mohammad; Sadeghi Bahmani, Dena; Bajoghli, Hafez; Holsboer-Trachsler, Edith; Brand, Serge	Neuropsychobiology
Youth life skills training: Exploring outcomes and mediating mechanisms of a group-randomized trial in physical education	This exploratory group-randomized study aimed at verifying (a) if a life skills program in physical education (PE) had a positive impact on physical fitness, sport skills, and executive cognitive function, and (b) if eventual physical and sport outcomes were mediated by gains in life skills and executive function. Ninety students aged 14–15 years participated in either an experimental life skills…	2016	2016-08	Pesce, Caterina; Marchetti, Rosalba; Forte, Roberta; Crova, Claudia; Scatigna, Maria; Goudas, Marios; Danish, Steve J.	Sport, Exercise, and Performance Psychology
The efficacy of eye movement desensitization and reprocessing for post-traumatic stress disorder and depression among Syrian refugees: results of a randomized controlled trial	Background Previous research indicates a high prevalence of post-traumatic stress disorder (PTSD) and depression among refugees. Eye movement desensitization and reprocessing (EMDR) is an effective treatment for PTSD for victims of natural disasters, car accidents or other traumatic events. The current study examined the effect of EMDR on symptoms of PTSD and depression by comparing the treatment…	2016	2016-09	Acarturk, C; Konuk, E; Cetinkaya, M; Senay, I; Sijbrandij, M; Gulen, B; Cuijpers, P	Psychological Medicine
Effects of one versus two bouts of moderate intensity physical activity on selective attention during a school morning in Dutch primary schoolchildren: A randomized controlled trial	Objectives Evidence suggests that physical activity is positively related to several aspects of cognitive functioning in children, among which is selective attention. To date, no information is available on the optimal frequency of physical activity on cognitive functioning in children. The current study examined the acute effects of one and two bouts of moderate-intensity physical activity on ch…	2016	2016-10	Altenburg, Teatske M; Chinapaw, Mai JM; Singh, Amika S	Journal of Science and Medicine in Sport
Executive functioning in TBI from rehabilitation to social reintegration: COMPASS goal, a randomized controlled trial (grant: 1I01RX000637-01A3 by the VA ORD RR&D, 2013-2016)		2015	2015	Libin, Alexander V; Scholten, Joel; Manon Maitland Schladen; Danford, Ellen; Nawar Shara; Penk, Walter; Grafman, Jordan; Resnik, Linda; Bruner, Dwan; Cichon, Samantha; Philmon, Miriam; Tsai, Brenda; Blackman, Marc; Dromerick, Alexander	Military Medical Research
Randomized controlled expressive writing pilot in individuals with Parkinsons disease and their caregivers		2015	2015	Therese Verkerke Cash; Lageman, Sarah K	BMC Psychology
Effects of treadmill training on cognitive and motor features of patients with mild to moderate Parkinson's disease: a pilot, single-blind, randomized controlled trial		2016	2016	Picelli, Alessandro, MD,PhD; Varalta, Valentina, PhD; Melotti, Camilla, MD; Zatezalo, Vanja, MD; Fonte, Cristina, PhD; Amato, Stefania, MSc; Saltuari, Leopold, MD; Santamato, Andrea, MD; Fiore, Pietro, MD; Smania, Nicola, MD	Functional Neurology
Cognitively Engaging Chronic Physical Activity, But Not Aerobic Exercise, Affects Executive Functions in Primary School Children: A Group-Randomized Controlled Trial	Although the positive effects of different kinds of physical activity (PA) on cognitive functioning have already been demonstrated in a variety of studies, the role of cognitive engagement in promoting children's executive functions is still unclear. The aim of the current study was therefore to investigate the effects of two qualitatively different chronic PA interventions on executive functions…	2015	2015-12	Schmidt, Mirko; Jaeger, Katja; Egger, Fabienne; Roebers, Claudia M.; Conzelmann, Achim	Journal of Sport & Exercise Psychology
Ginseng and Ginkgo Biloba Effects on Cognition as Modulated by Cardiovascular Reactivity: A Randomised Trial	Background There is some evidence to suggest that ginseng and Ginkgo biloba can improve cognitive performance, however, very little is known about the mechanisms associated with such improvement. Here, we tested whether cardiovascular reactivity to a task is associated with cognitive improvement. Methodology/Principal findings Using a double-blind, placebo controlled, crossover design, participan…	2016	2016-03	Teik, Derek OngLai; Lee, Xiao Shiang; Lim, Chu Jian; Low, Chia Mei; Muslima, Mariyam; Aquili, Luca	PLoS One
Dual N-Back Working Memory Training in Healthy Adults: A Randomized Comparison to Processing Speed Training	Enhancing cognitive ability is an attractive concept, particularly for middle-aged adults interested in maintaining cognitive functioning and preventing age-related declines. Computerized working memory training has been investigated as a safe method of cognitive enhancement in younger and older adults, although few studies have considered the potential impact of working memory training on middle…	2016	2016-04	Lawlor-Savage, Linette; Goghari, Vina M	PLoS One
Comparison of effects of Sahaj Yoga Meditation on Cognitive Functions in practising and non-practising Healthy Subjects	Sahaj yoga meditation practice is already known to reduce stress, enhance parasympatho-dominance, alpha rhythm in the brain and change biochemical parameters favourably in healthy subjects and is also beneficial as an adjunct in psycho-somatic disorders. The presented randomized control study was carried out on 30 healthy subjects (19 Males and 11 females) in the age group of 18 to 45 years. Subj…	2014	2014	Sharma, Vivek K; Gupta, Shailesh; Das, Shobha; Mondal, Sunita; Goswami, Utpal; Kumar, Senthil S	International Journal of Physiology
Aerobic exercise and yoga improve neurocognitive function in women with early psychosis	Impairments of attention and memory are evident in early psychosis, and are associated with functional disability. In a group of stable, medicated women patients, we aimed to determine whether participating in aerobic exercise or yoga improved cognitive impairments and clinical symptoms. A total of 140 female patients were recruited, and 124 received the allocated intervention in a randomized con…	2015	2015	Lin, Jingxia; Chan, Sherry Kw; Lee, Edwin Hm; Chang, Wing Chung; Tse, Michael; Su, Wayne Weizhong; Sham, Pak; Hui, Christy Lm; Joe, Glen; Chan, Cecilia Lw; Khong, P. L.; So, Kwok Fai; Honer, William G.; Chen, Eric Yh	NPJ schizophrenia
Acute Effects of Classroom Exercise Breaks on Executive Function and Math Performance: A Dose-Response Study	Purpose: The purpose of this study was to determine the acute dose-response relationship of classroom exercise breaks with executive function and math performance in 9- to 12-year-old children by comparing 5-min, 10-min, or 20-min classroom exercise breaks to 10 min of sedentary classroom activity. Method: This study used a within-subjects experimental design conducted in the spring of 2012. Nine…	2015	2015	Howie, Erin K; Schatz, Jeffrey; Pate, Russell R	Research Quarterly for Exercise and Sport
Impact of Various Caffeine Vehicles on Mood and Cognitive, Neurpological and Physiological Functions Over Five Hours	Although college students' caffeine consumption has increased over the last decade, studies have not yet determined the time frame in which caffeine exerts its effects nor the impact of the vehicle by which caffeine is consumed. Sixty college students were randomly divided into one placebo (flour) and three caffeine treatment groups: 5-Hour Energy®, Starbucks DoubleShot®, or caffeine powder. A ba…	2015	2015	Paulus, Ryan; Roth, Alex; Titus, Lauren; Chen, Renee; Bridges, Michael Chad; Woodyard, Shyla	The Ohio Journal of Science
Efficacy of Yoga therapy for the management of psychopathology of patients having chronic schizophrenia	Background: There is a large body of literature and scientific data regarding the efficacy of pharmacological and psychosocial interventions for schizophrenia, however, studies on Yoga therapy is scanty. Yoga is a means of balancing and harmonizing the body, mind and emotion, and for enlightening the mind and upliftment of the total personality. Aims: The present study was conducted to determine …	2015	2015	Paikkatt, Babu; Singh, Amool; Singh, Pawan; Jahan, Masroor; Ranjan, Jay	Indian Journal of Psychiatry
Effects of combined physical and cognitive training on fitness and neuropsychological outcomes in healthy older adults	Purpose: Physical exercise and cognitive training have been shown to enhance cognition among older adults. However, few studies have looked at the potential synergetic effects of combining physical and cognitive training in a single study. Prior trials on combined training have led to interesting yet equivocal results. The aim of this study was to examine the effects of combined physical and cogn…	2016	2016	Desjardins-Crepeau, Laurence; Berryman, Nicolas; Fraser, Sarah A.; Vu, Thien Tuong Minh; Kergoat, Marie-Jeanne; Li, Karen Z. H.; Bosquet, Laurent; Bherer, Louis	Clinical Interventions in Aging
Acute Effects of 30 Minutes Resistance and Aerobic Exercise on Cognition in a High School Sample	Purpose: The purpose of this study was to determine differences in cognition between acute bouts of resistance exercise, aerobic exercise, and a nonexercise control in an untrained youth sample. Method: Ninety-four participants performed 30 min of aerobic exercise, resistance exercise, or nonexercise separated by 7 days each in a randomized crossover design. After each exercise intervention, part…	2016	2016	Harveson, Andrew T; Hannon, James C; Brusseau, Timothy A; Podlog, Leslie; Papadopoulos, Charilaos; Durrant, Lynne H; Hall, Morgan S; Kang, Kyoung-doo	Research Quarterly for Exercise and Sport
Effects of Moderate Aerobic Exercise on Cognitive Abilities and Redox State Biomarkers in Older Adults	We used a moderate aerobic exercise program for 24 weeks to measure the positive impact of physical activity on oxidative stress and inflammatory markers and its association with cognitive performance in healthy older adults. A total of 100 healthy subjects (65-95 Yrs) were randomly classified into two groups: control group (n=50) and exercise group (n=50). Cognitive functioning, physical activit…	2016	2016	Alghadir, Ahmad H; Gabr, Sami A; Al-Eisa, Einas S	Oxidative Medicine and Cellular Longevity
Acute high-intensity exercise-induced cognitive enhancement and brain-derived neurotrophic factor in young, healthy adults	Acute exercise can positively impact cognition. The present study examined the effect of acute high-intensity aerobic exercise on prefrontal-dependent cognitive performance and brain-derived neurotrophic factor (BDNF). Fifty-eight young adults were randomly assigned to one of two experimental groups: (a) an acute bout of high-intensity exercise (n = 29) or (b) a non-exercise control (n = 29). Par…	2016	2016-09-06	Hwang, Jungyun; Brothers, R. Matthew; Castelli, Darla M.; Glowacki, Elizabeth M.; Chen, Yen T.; Salinas, Mandy M.; Kim, Jihoon; Jung, Yeonhak; Calvert, Hannah G.	Neuroscience Letters
Exploratory outcome assessment of Qigong/Tai Chi Easy on breast cancer survivors	Objective Breast cancer survivors (BCSs) experience symptoms affecting overall quality of life (QOL), often for a prolonged period post-treatment. Meditative Movement (MM), including Qigong and Tai Chi Easy (QG/TCE), has demonstrated benefit for improving QOL issues such as fatigue and sleep, but there is limited evidence of its impact on cognitive function, overall physical activity, and body we…	2016	2016-12-01	Larkey, Linda K; Roe, Denise J; Smith, Lisa; Millstine, Denise	Complementary Therapies in Medicine
Acute Exercise Improves Prefrontal Cortex but not Hippocampal Function in Healthy Adults	The effects of acute aerobic exercise on cognitive functions in humans have been the subject of much investigation; however, these studies are limited by several factors, including a lack of randomized controlled designs, focus on only a single cognitive function, and testing during or shortly after exercise. Using a randomized controlled design, the present study asked how a single bout of aerob…	2015	2015-11	Basso, Julia C; Shang, Andrea; Elman, Meredith; Karmouta, Ryan; Suzuki, Wendy A	Journal of the International Neuropsychological Society : JINS
Physical Activity, Affect, and Cognition in Children With Symptoms of ADHD	Objective: To examine the role of physical activity in determining the affect and executive functioning of children with symptoms of ADHD. Method: In Study 1, the association between physical activity and affect in the daily lives of children with varying degrees of hyperactivity was examined. In Study 2, children with ADHD were randomly assigned a physical activity or a sedentary task before wor…	2016	2016-02	Gawrilow, Caterina; Stadler, Gertraud; Langguth, Nadine; Naumann, Alexander; Boeck, Antje	Journal of Attention Disorders
The Effect of Aerobic Exercise on Neuroplasticity within the Motor Cortex following Stroke	Background Aerobic exercise is associated with enhanced plasticity in the motor cortex of healthy individuals, but the effect of aerobic exercise on neuroplasticity following a stroke is unknown. Objective The aim of this study was to compare corticomotoneuronal excitability and neuroplasticity in the upper limb cortical representation following a single session of low intensity lower limb cyclin…	2016	2016-03	Murdoch, Kate; Buckley, Jonathan D; McDonnell, Michelle N	PLoS One
The Effect of Karate Techniques Training on Communication Deficit of Children with Autism Spectrum Disorders	This investigation examined the long term effect of Karate techniques training on communication of children with autism spectrum disorders (ASD). Thirty school aged children with ASD were randomly assigned to an exercise (n = 15) or a control group (n = 15). Participants in the exercise group were engaged in 14 weeks of Karate techniques training. Communication deficit at baseline, post-intervent…	2016	2016-03	Bahrami, Fatimah; Movahedi, Ahmadreza; Marandi, Sayed Mohammad; Sorensen, Carl	Journal of Autism and Developmental Disorders
Executive functions improvement following a 5-month aquaerobics program in older adults: Role of cardiac vagal control in inhibition performance	The aims of this study were to examine the effects of aerobic exercise on measures of executive performance and their relationships with changes in cardiorespiratory fitness, cardiac vagal control (heart rate variability) and psychological variables. Thirty-six sedentary seniors aged 60-75 years were randomly assigned to a swimming and aquaerobics program or a stretching program two times a week …	2016	2016-03	Albinet, Cédric T.; Abou-Dest, Amira; André, Nathalie; Audiffren, Michel	Biological Psychology
Effects of Motor versus Cardiovascular Exercise Training on Children's Working Memory	PURPOSE: The aim of this investigation was to examine the influence of different types of exercise exertion on primary school children's working memory (WM). METHODS: Participants (N = 71, 9.4 yr, 39 girls) were randomly assigned to a cardiovascular exercise (CE), a motor exercise (ME), or a control group (CON). They underwent a letter digit span task (WM) before and after an intervention period …	2016	2016-06	Koutsandréou, Flora; Wegner, Mirko; Niemann, Claudia; Budde, Henning	Medicine and Science in Sports and Exercise
Acute Exercise and Motor Memory Consolidation: The Role of Exercise Intensity	A single bout of high intensity aerobic exercise (~90% VO2peak) was previously demonstrated to amplify off-line gains in skill level during the consolidation phase of procedural memory. High intensity exercise is not always a viable option for many patient groups or in a rehabilitation setting where low to moderate intensities may be more suitable. The aim of this study was to investigate the rol…	2016	2016-07	Thomas, Richard; Johnsen, Line K; Geertsen, Svend S; Christiansen, Lasse; Ritz, Christian; Roig, Marc; Lundbye-Jensen, Jesper	PLoS One
Cognitive enhancement by transcranial laser stimulation and acute aerobic exercise	This is the first randomized, controlled study comparing the cognitive effects of transcranial laser stimulation and acute aerobic exercise on the same cognitive tasks. We examined whether transcranial infrared laser stimulation of the prefrontal cortex, acute high-intensity aerobic exercise, or the combination may enhance performance in sustained attention and working memory tasks. Sixty healthy…	2016	2016-08	Hwang, Jungyun; Castelli, Darla M.; Gonzalez-Lima, F.	Lasers in Medical Science
Yoga practice improves executive function by attenuating stress levels	BACKGROUND: Prolonged activation of the hypothalamus-pituitary-adrenal system is thought to have deleterious effects on brain function. Neuroendocrine studies suggest that brain exposure to higher cortisol concentrations contribute to cognitive deficits as we age. Mind-body techniques such as yoga have shown to improve stress levels by restoring the body's sympathetic-parasympathetic balance. The…	2016	2016-12	Gothe, Neha P.; Keswani, Rahul K.; McAuley, Edward	Biological Psychology
The effect of regular walks on various health aspects in older people with dementia: protocol of a randomized-controlled trial	Abstract Background: Physical activity has proven to be beneficial for physical functioning, cognition, depression, anxiety, rest-activity rhythm, quality of life (QoL), activities of daily living (ADL) and pain in older people. The aim of this study is to investigate the effect of walking regularly on physical functioning, the progressive cognitive decline, level of depression, anxiety, rest-act…	2011	2011	Volkers, Karin M; Scherder, Erik JA	BMC Geriatrics
Move it to improve it (Mitii): study protocol of a randomised controlled trial of a novel web-based multimodal training program for children and adolescents with cerebral palsy	Introduction Persons with cerebral palsy require a lifetime of costly and resource intensive interventions which are often limited by equity of access. With increasing burden being placed on health systems, new methods to deliver intensive rehabilitation therapies are needed. Move it to improve it (Mitii) is an internet-based multimodal programme comprising upper-limb and cognitive training with …	2013	2013	Boyd, Roslyn N; Mitchell, Louise E; James, Sarah T; Ziviani, Jenny; Sakzewski, Leanne; Smith, Anthony; Rose, Stephen; Cunnington, Ross; Whittingham, Koa; Ware, Robert S; Comans, Tracey A; Scuffham, Paul A	BMJ Open
Treatment of antipsychotic-associated obesity with a GLP-1 receptor agonist-protocol for an investigator-initiated prospective, randomised, placebo-controlled, double-blinded intervention study: the TAO study protocol	Introduction Antipsychotic medication is widely associated with dysmetabolism including obesity and type 2 diabetes, cardiovascular-related diseases and early death. Obesity is considered the single most important risk factor for cardiovascular morbidity and mortality. Interventions against antipsychotic-associated obesity are limited and insufficient. Glucagon-like peptide-1 (GLP-1) receptor ago…	2014	2014	Ishøy, Pelle L; Knop, Filip K; Broberg, Brian V; Baandrup, Lone; Fagerlund, Birgitte; Jørgensen, Niklas R; Andersen, Ulrik B; Rostrup, Egill; Glenthøj, Birte Y; Ebdrup, Bjørn H	BMJ Open
Increasing physical activity in office workers - the Inphact Treadmill study; a study protocol for a 13-month randomized controlled trial of treadmill workstations	Background Sedentary behaviour is an independent risk factor for mortality and morbidity, especially for type 2 diabetes. Since office work is related to long periods that are largely sedentary, it is of major importance to find ways for office workers to engage in light intensity physical activity (LPA). The Inphact Treadmill study aims to investigate the effects of installing treadmill workstat…	2015	2015	Bergman, Frida; Carl-Johan Boraxbekk; Wennberg, Patrik; Sorlin, Ann; Olsson, Tommy	BMC Public Health
Physical Exercise Training versus Relaxation in Allogeneic stem cell transplantation (PETRA Study) - Rationale and design of a randomized trial to evaluate a yearlong exercise intervention on overall survival and side-effects after allogeneic stem cell transplantation	Background Allogeneic stem cell transplantation (allo-HCT) is associated with high treatment-related mortality and innumerable physical and psychosocial complications and side-effects, such as high fatigue levels, loss of physical performance, infections, graft-versus-host disease (GvHD) and distress. This leads to a reduced quality of life, not only during and after transplantation, but also in …	2015	2015	Wiskemann, Joachim; Kuehl, Rea; Dreger, Peter; Huber, Gerhard; Kleindienst, Nikolaus; Ulrich, Cornelia M; Bohus, Martin	BMC Cancer
Efficacy of an exercise intervention for employees with work-related fatigue: study protocol of a two-arm randomized controlled trial	Background The aim of the current study is to evaluate the efficacy of an exercise intervention to reduce work-related fatigue. Exercise is a potentially effective intervention strategy to reduce work-related fatigue, since it may enhance employees' ability to cope with work stress and it helps to detach from work. However, based on available research, no clear causal inferences regarding its eff…	2015	2015	de Vries, Juriena D; Madelon L M van Hooff; Geurts, Sabine A E; Kompier, Michiel A J	BMC Public Health
The ParkinPlay study: protocol of a phase II randomized controlled trial to assess the effects of a health game on cognition in Parkinsons disease	Background In Parkinson's disease (PD), cognitive impairment is an important non-motor symptom heralding the development of dementia. Effective treatments to slow down the rate of cognitive decline in PD patients with mild cognitive impairment are lacking. Here, we describe the design of the Parkin'Play study, which assesses the effects of a cognitive health game intervention on cognition in PD. …	2016	2016	Sjors C F van de Weijer; Annelien A Duitsstiaan R Bloem; Kessels, Roy P; Jansen, Jacobus F A; Kohler, Sebastian; Tissingh, Gerrit; Kuijf, Mark L	BMC Neurology
protocol for the Electroencephalography Guidance of Anesthesia to Alleviate Geriatric Syndromes (ENGAGES) study: a pragmatic, randomised clinical trial	Introduction Postoperative delirium, arbitrarily defined as occurring within 5 days of surgery, affects up to 50% of patients older than 60 after a major operation. This geriatric syndrome is associated with longer intensive care unit and hospital stay, readmission, persistent cognitive deterioration and mortality. No effective preventive methods have been identified, but preliminary evidence sug…	2016	2016	Wildes, T S; Winter, A C; Maybrier, H R; Mickle, A M; Lenze, E J; Stark, S; Lin, N; Inouye, S K; Schmitt, E M; McKinnon, S L; Muench, M R; Murphy, M R; Upadhyayula, R T; Fritz, B A; Escallier, K E; Apakama, G P; Emmert, D A; Graetz, T J; Stevens, T W; Palanca, B J; Hueneke, R L; Melby, S; Torres, B; Leung, J; Jacobsohn, E; Avidan, M S	BMJ Open
Study protocol: a randomised controlled trial of cognitive remediation for a national cohort of forensic mental health patients with schizophrenia or schizoaffective disorder	Background Evidence is accumulating that cognitive remediation therapy (CRT) is an effective intervention for patients with schizophrenia or schizoaffective disorder. To date there has been no randomised controlled trial (RCT) cohort study of cognitive remediation within a forensic hospital. The goal of this study is to examine the effectiveness of a trial of cognitive remediation for forensic me…	2016	2016	OReilly, Ken; Donohoe, Gary; OSullivan, Danny; Coyle, Ciaran; Mullaney, Ronan; OConnell, Paul; Maddock, Catherine; Nulty, Andrea; OFlynn, Padraic; OConnell, Carina; Kennedy, Harry G	BMC Psychiatry
Healthy Learning Mind - a school-based mindfulness and relaxation program: a study protocol for a cluster randomized controlled trial	Background Mindfulness has shown positive effects on mental health, mental capacity and well-being among adult population. Among children and adolescents, previous research on the effectiveness of mindfulness interventions on health and well-being has shown promising results, but studies with methodologically sound designs have been called for. Few intervention studies in this population have com…	2016	2016	Salla-maarit Volanen; Lassander, Maarit; Hankonen, Nelli; Santalahti, Paivi; Hintsanen, Mirka; Simonsen, Nina; Raevuori, Anu; Mullola, Sari; Vahlberg, Tero; But, Anna; Suominen, Sakari	BMC Psychology
Increasing physical activity among young children from disadvantaged communities: study protocol of a group randomised controlled effectiveness trial	Background Participation in regular physical activity (PA) during the early years helps children achieve healthy body weight and can substantially improve motor development, bone health, psychosocial health and cognitive development. Despite common assumptions that young children are naturally active, evidence shows that they are insufficiently active for health and developmental benefits. Explor…	2016	2016	Stanley, Rebecca M; Jones, Rachel A; Cliff, Dylan P; Trost, Stewart G; Berthelsen, Donna; Salmon, Jo; Batterham, Marijka; Eckermann, Simon; Reilly, John J; Brown, Ngiare; Mickle, Karen J; Howard, Steven J; Hinkley, Trina; Janssen, Xanne; Chandler, Paul; Cross, Penny	BMC Public Health
Cognitive remediation therapy (CRT) as a treatment enhancer of eating disorders and obsessive compulsive disorders: study protocol for a randomized controlled trial	Background Anorexia nervosa (AN) and Obsessive Compulsive Disorder (OCD) are among the most incapacitating and costly of mental disorders. Cognitive Behaviour Therapy (CBT), medication, and combination regimens, to which in AN personalised guidance on weight control is added, are moderately successful, leaving room for more effective treatment algorithms. An underlying deficit which the two disor…	2016	2016	Boris van Passel; Danner, Unna; Dingemans, Alexandra; Eric van Furth; Sternheim, Lot; Annemarie van Elburg; Agnes van Minnen; van den Hout, Marcel; Hendriks, Gert-Jan; Cath, Danielle	BMC Psychiatry
A comparative randomized controlled pragmatic trial of neurofeedback and working memory training for children with attention-deficit/hyperactivity disorder: protocol	Today, the treatment for children and adolescents with attention-deficit/hyperactivity disorder (ADHD) is predominantly pharmacological. However, not all individuals respond to medication or some may experience problematic side effects. In addition, the compliance and treatment fidelity to medication is sometimes limited; thus, effective non-pharmacological treatment options are desirable. Neuroc…	2016	2016	Hasslinger, John; Sirviö, Seija; Berggren, Steve; Myers, Lynnea; Flygare, Oskar; Tammimies, Kristiina; Bölte, Sven	Translational Developmental Psychiatry
Physical activity as intervention for age-related loss of muscle mass and function: protocol for a randomised controlled trial (the LISA study)	Introduction Physical and cognitive function decline with age, accelerating during the 6th decade. Loss of muscle power (forcexvelocity product) is a dominant physical determinant for loss of functional ability, especially if the lower extremities are affected. Muscle strength training is known to maintain or even improve muscle power as well as physical function in older adults, but the optimal …	2016	2016	Eriksen, Christian Skou; Garde, Ellen; Reislev, Nina Linde; Wimmelmann, Cathrine Lawaetz; Bieler, Theresa; Ziegler, Andreas Kraag; Gylling, Anne Theil; Dideriksen, Kasper Juel; Siebner, Hartwig Roman; Mortensen, Erik Lykke; Kjaer, Michael	BMJ Open
The effect of a family-based mindfulness intervention on children with attention deficit and hyperactivity symptoms and their parents: design and rationale for a randomized, controlled clinical trial (Study protocol)	Background About 4 % of children in Hong Kong have attention deficit hyperactivity disorder (ADHD). The parents of children with ADHD report higher levels of stress and show more negative parenting behavior. Medication and behavior training are evidence-based treatments, but both show significant limitations. In short, medical treatment is not suitable for preschool children and would suppress gr…	2016	2016	Lo, Herman H M; Wong, Samuel Y S; Wong, Janet Y H; Wong, Simpson W L; Yeung, Jerf W K	BMC Psychiatry
Randomised controlled trial of a digitally assisted low intensity intervention to promote personal recovery in persisting psychosis: SMART-Therapy study protocol	Background Psychosocial interventions have an important role in promoting recovery in people with persisting psychotic disorders such as schizophrenia. Readily available, digital technology provides a means of developing therapeutic resources for use together by practitioners and mental health service users. As part of the Self-Management and Recovery Technology (SMART) research program, we have …	2016	2016	Thomas, Neil; Farhall, John; Foley, Fiona; Rossell, Susan L; Castle, David; Ladd, Emma; Meyer, Denny; Mihalopoulos, Cathrine; Leitan, Nuwan; Nunan, Cassy; Frankish, Rosalie; Smark, Tara; Farnan, Sue; McLeod, Bronte; Sterling, Leon; Murray, Greg	BMC Psychiatry
The effects of video observation of chewing during lunch on masticatory ability, food intake, cognition, activities of daily living, depression, and quality of life in older adults with dementia: a study protocol of an adjusted randomized controlled trial	Background Masticatory functioning alters with age. However, mastication has been found to be related to, for example, cognitive functioning, food intake, and some aspects of activities of daily living. Since cognitive functioning and activities of daily living show a decline in older adults with dementia, improving masticatory functioning may be of relevance to them. A possible way to improve ma…	2016	2016	Douma, Johanna G; Volkers, Karin M; Vuijk, Pieter Jelle; Scherder, Erik J A	BMC Geriatrics
"GET-UP" study rationale and protocol: a cluster randomised controlled trial to evaluate the effects of reduced sitting on toddlers cognitive development	Background The educational and cognitive differences associated with low socioeconomic status begin early in life and tend to persist throughout life. Coupled with the finding that levels of sedentary time are negatively associated with cognitive development, and time spent active tends to be lower in disadvantaged circumstances, this highlights the need for interventions that reduce the amount o…	2016	2016	Santos, Rute; Cliff, Dylan P; Howard, Steven J; Veldman, Sanne L; Wright, Ian M; Sousa-Sa, Eduarda; Pereira, Joao R; Okely, Anthony D	BMC Pediatrics
Investigating the efficacy of an individualized metacognitive therapy program (MCT+) for psychosis: study protocol of a multi-center randomized controlled trial	Background Psychological interventions are increasingly recommended as adjunctive treatments for psychosis, but their implementation in clinical practice is still insufficient. The individualized metacognitive therapy program (MCT+; www.uke.de/mct_plus) represents a low-threshold psychotherapeutic approach that synthesizes group metacognitive training (MCT) and cognitive behavioral therapy for ps…	2016	2016	Schneider, Brooke C; Brune, Martin; Bohn, Francesca; Veckenstedt, Ruth; Kolbeck, Katharina; Krieger, Eva; Becker, Anna; Kim, Alisha Drommelschmidt; Englisch, Susanne; Eisenacher, Sarah; Lee-Grimm, Sie-In; Nagel, Matthias; Zink, Mathias; Moritz, Steffen	BMC Psychiatry
A protocol for a randomised active-controlled trial to evaluate the effects of an online mindfulness intervention on executive control, critical thinking and key thinking dispositions in a university student sample	Background While most modern research focuses on the clinical benefits of mindfulness, an emerging body of work suggests that mindfulness can facilitate self-regulation of everyday thinking in typically developing individuals. This behaviour is best captured using critical thinking assessments. The aim of this paper is to describe a rigorous, pre-registered study which will investigate the effect…	2016	2016	Noone, Chris; Hogan, Michael J	BMC Psychology
Home-based exercise and support programme for people with dementia and their caregivers: study protocol of a randomised controlled trial	Abstract Background: Dementia affects the mood of people with dementia but also of their caregivers. In the coming years, the number of people with dementia will increase worldwide and most of them will continue to live in the community as long as possible. Home-based psychosocial interventions reducing the depressive symptoms of both people with dementia and their caregivers in their own home ar…	2011	2011	Prick, Anna-Eva; de Lange, Jacomine; Scherder, Erik; Pot, Anne Margriet	BMC Public Health
The effects of a rhythm and music-based therapy program and therapeutic riding in late recovery phase following stroke: a study protocol for a three-armed randomized controlled trial	Doc number: 141 Abstract Background: Stroke represents one of the most costly and long-term disabling conditions in adulthood worldwide and there is a need to determine the effectiveness of rehabilitation programs in the late phase after stroke. Limited scientific support exists for training incorporating rhythm and music as well as therapeutic riding and well-designed trials to determine the eff…	2012	2012	Bunketorp Käll, Lina; Lundgren-Nilsson, Åsa; Blomstrand, Christian; Pekna, Marcela; Pekny, Milos; Nilsson, Michael	BMC Neurology
Study protocol: a randomised controlled trial of the effects of a multi-modal exercise program on cognition and physical functioning in older women	Doc number: 60 Abstract Background: Intervention studies testing the efficacy of cardiorespiratory exercise have shown some promise in terms of improving cognitive function in later life. Recent developments suggest that a multi-modal exercise intervention that includes motor as well as physical training and requires sustained attention and concentration, may better elicit the actual potency of e…	2012	2012	Vaughan, Sue; Morris, Norm; Shum, David; O'Dwyer, Siobhan; Polit, Denise	BMC Geriatrics
Training dual-task walking in community-dwelling adults within 1 year of stroke: a protocol for a single-blind randomized controlled trial	Doc number: 129 Abstract Background: Community ambulation is a highly complex skill requiring the ability to adapt to increased environmental complexity and perform multiple tasks simultaneously. After stroke, individuals demonstrate a diminished ability to perform dual-tasks. Current evidence suggests that conventional rehabilitation does not adequately address gait-related dual-task impairments…	2012	2012	Plummer-D'Amato, Prudence; Kyvelidou, Anastasia; Sternad, Dagmar; Najafi, Bijan; Villalobos, Raymond M; Zurakowski, David	BMC Neurology
protocol for a randomized controlled trial evaluating the effect of physical activity on delaying the progression of white matter changes on MRI in older adults with memory complaints and mild cognitive impairment: The AIBL Active trial	Doc number: 167 Abstract Background: Older adults free of dementia but with subjective memory complaints (SMC) or mild cognitive impairment (MCI) are considered at increased risk of cognitive decline. Vascular risk factors (VRF), including hypertension, heart disease, smoking, hypercholesterolemia and lack of physical activity (PA) have been identified as modifiable risk factors contributing to c…	2012	2012	Cyarto, Elizabeth V; Lautenschlager, Nicola T; Desmond, Patricia M; Ames, David; Szoeke, Cassandra; Salvado, Olivier; Sharman, Matthew J; Ellis, Kathryn A; Phal, Pramit M; Masters, Colin L; Rowe, Christopher C; Martins, Ralph N; Cox, Kay L	BMC Psychiatry
A protocol for a randomized clinical trial of interactive video dance: potential for effects on cognitive function	Doc number: 23 Abstract Background: Physical exercise has the potential to affect cognitive function, but most evidence to date focuses on cognitive effects of fitness training. Cognitive exercise also may influence cognitive function, but many cognitive training paradigms have failed to provide carry-over to daily cognitive function. Video games provide a broader, more contextual approach to cog…	2012	2012	Jovancevic, Jelena; Rosano, Caterina; Perera, Subashan; Erickson, Kirk I; Studenski, Stephanie	BMC Geriatrics
Wide Awake Parenting: study protocol for a randomised controlled trial of a parenting program for the management of post-partum fatigue	Doc number: 26 Abstract Background: Exhaustion and fatigue are commonly experienced by parents during the post-partum period, and can have implications for daily functioning, mental health and parenting practices. There is a need for the development of effective interventions to assist parents with the management of fatigue. This paper outlines the procedure for a randomised controlled study whic…	2013	2013	Dunning, Melissa; Seymour, Monique; Cooklin, Amanda; Giallo, Rebecca	BMC Public Health
Intervention to prevent further falls in older people who call an ambulance as a result of a fall: a protocol for the iPREFER randomised controlled trial	Doc number: 360 Abstract Background: An increasing number of falls result in an emergency call and the subsequent dispatch of paramedics. In the absence of physical injury, abnormal physiological parameters or change in usual functional status, it could be argued that routine conveyance by ambulance to the Emergency Department (ED) is not the most effective or efficient use of resources. Further,…	2013	2013	Mikolaizak, A Stefanie; Simpson, Paul M; Tiedemann, Anne; Lord, Stephen R; Caplan, Gideon A; Bendall, Jason C; Howard, Kirsten; Close, Jacqueline CT	BMC Health Services Research
Increased masticatory activity and quality of life in elderly persons with dementia-a longitudinal matched cluster randomized single-blind multicenter intervention study	Doc number: 26 Abstract Background: Worldwide, millions of people are suffering from dementia and this number is rising. An index of quality of life (QoL) can describe the impact a disease or treatment has on a person's wellbeing. QoL comprises many variables, including physical health and function, and mental health and function. QoL is related to masticatory ability and physical activity. Anima…	2013	2013	Weijenberg, Roxane Anthea Francesca; Lobbezoo, Frank; Knol, Dirk Lucas; Tomassen, Jori; Scherder, Erik Johan Anton	BMC Neurology
ICT-based system to predict and prevent falls (iStoppFalls): study protocol for an international multicenter randomized controlled trial	Doc number: 91 Abstract Background: Falls are very common, especially in adults aged 65 years and older. Within the current international European Commission's Seventh Framework Program (FP7) project 'iStoppFalls' an Information and Communication Technology (ICT) based system has been developed to regularly assess a person's risk of falling in their own home and to deliver an individual and tailo…	2014	2014	Gschwind, Yves J; Eichberg, Sabine; Marston, Hannah R; Ejupi, Andreas; Rosario, Helios de; Kroll, Michael; Drobics, Mario; Annegarn, Janneke; Wieching, Rainer; Lord, Stephen R; Aal, Konstantin; Delbaere, Kim	BMC Geriatrics
Randomized control trial of computer-based rehabilitation of spatial neglect syndrome: the RESPONSE trial protocol	Doc number: 25 Abstract Background: Spatial neglect is a frequent and debilitating consequence of acquired brain injury and currently has no widely accepted standard of care. While previous interventions for spatial neglect have targeted patients' overt spatial deficits (e.g., reduced contralesional visual scanning), far fewer have directly targeted patients' non-spatial deficits (e.g., sustained…	2014	2014	Vleet, Thomas Van; DeGutis, Joseph; Dabit, Sawsan; Chiu, Christopher	BMC Neurology
Proactive outreach for smokers using VHA mental health clinics: protocol for a patient-randomized clinical trial	Doc number: 1294 Abstract Background: Persons with a mental health diagnosis have high rates of tobacco use and face numerous barriers to cessation including high levels of nicotine dependence, low rates of tobacco treatment referrals from mental health providers, and limited availability of tobacco treatment targeted to their needs. This manuscript describes the rationale and methods of a clinic…	2014	2014	Rogers, Erin S; Fu, Steven S; Krebs, Paul; Noorbaloochi, Siamak; Nugent, Sean M; Rao, Radha; Schlede, Carolyn; Sherman, Scott E	BMC Public Health
protocol for a randomized comparison of integrated versus consecutive dual task practice in Parkinson's disease: the DUALITY trial	Doc number: 61 Abstract Background: Multiple tasking is an integral part of daily mobility. Patients with Parkinson's disease have dual tasking difficulties due to their combined motor and cognitive deficits. Two contrasting physiotherapy interventions have been proposed to alleviate dual tasking difficulties: either to discourage simultaneous execution of dual tasks (consecutive training); or to…	2014	2014	Strouwen, Carolien; Molenaar, Esther ALM; Keus, Samyra HJ; Münks, Liesbeth; Munneke, Marten; Vandenberghe, Wim; Bloem, Bastiaan R; Nieuwboer, Alice	BMC Neurology
Persistent Lyme Empiric Antibiotic Study Europe (PLEASE) - design of a randomized controlled trial of prolonged antibiotic treatment in patients with persistent symptoms attributed to Lyme borreliosis	Doc number: 543 Abstract Background: Lyme borreliosis, a potentially severe tick-borne infection caused by Borrelia burgdorferi , can cause multi-system inflammatory disease. The incidence has been increasing, as has the number of patients with persistent symptoms attributed to Borrelia . These symptoms, also referred to as post-Lyme disease syndrome, may follow an erythema migrans or other Lyme …	2014	2014	Berende, Anneleen; ter Hofstede, Hadewych JM; Donders, A Rogier T; van Middendorp, Henriët; Kessels, Roy PC; Adang, Eddy MM; Vos, Fidel J; Evers, Andrea WM; Kullberg, Bart Jan	BMC Infectious Diseases
Beneficial effects of short-term combination exercise training on diverse cognitive functions in healthy older people: study protocol for a randomized controlled trial	BACKGROUND: Results of previous studies have shown that exercise training can improve cognitive functions in healthy older people. Some studies have demonstrated that long-term combination exercise training can facilitate memory function improvement better than either aerobic or strength exercise training alone. Nevertheless, it remains unclear whether short-term combination exercise training can…	2012	2012-10-29	Nouchi, Rui; Taki, Yasuyuki; Takeuchi, Hikaru; Hashizume, Hiroshi; Nozawa, Takayuki; Sekiguchi, Atsushi; Nouchi, Haruka; Kawashima, Ryuta	Trials
REFLEX, a social-cognitive group treatment to improve insight in schizophrenia: study protocol of a multi-center RCT	Abstract Background: Insight is impaired in a majority of people with schizophrenia. Impaired insight is associated with poorer outcomes of the disorder. Based on existing literature, we developed a model that explains which processes may possibly play a role in impaired insight. This model was the starting point of the development of REFLEX: a brief psychosocial intervention to improve insight i…	2011	2011	Pijnenborg, GHM; Van der Gaag, Mark; Bockting, Claudi LH; Van der Meer, Lisette; Aleman, André	BMC Psychiatry
Study protocol: EXERcise and Cognition In Sedentary adults with Early-ONset dementia (EXERCISE-ON)	Doc number: 75 Abstract Background: Although the development of early-onset dementia is a radical and invalidating experience for both patient and family there are hardly any non-pharmacological studies that focus on this group of patients. One type of a non-pharmacological intervention that appears to have a beneficial effect on cognition in older persons without dementia and older persons at ri…	2012	2012	Hooghiemstra, Astrid M; Eggermont, Laura HP; Scheltens, Philip; van der Flier, Wiesje M; Bakker, Jet; de Greef, Mathieu HG; Koppe, Peter A; Scherder, Erik JA	BMC Neurology
Study protocol: the Whitehall II imaging sub-study	Doc number: 159 Abstract Background: The Whitehall II (WHII) study of British civil servants provides a unique source of longitudinal data to investigate key factors hypothesized to affect brain health and cognitive ageing. This paper introduces the multi-modal magnetic resonance imaging (MRI) protocol and cognitive assessment designed to investigate brain health in a random sample of 800 members…	2014	2014	Filippini, Nicola; Zsoldos, Eniko; Haapakoski, Rita; Sexton, Claire E; Mahmood, Abda; Allan, Charlotte L; Topiwala, Anya; Valkanova, Vyara; Brunner, Eric J; Shipley, Martin J; Auerbach, Edward; Moeller, Steen; Ugurbil, Kâmil; Xu, Junqian; Yacoub, Essa; Andersson, Jesper; Bijsterbosch, Janine; Clare, Stuart; Griffanti, Ludovica; Hess, Aaron T; Jenkinson, Mark; Miller, Karla L; Salimi-Khorshidi, Gh…	BMC Psychiatry
Randomized trial of achieving healthy lifestyles in psychiatric rehabilitation: the ACHIEVE trial	Abstract Background: Overweight and obesity are highly prevalent among persons with serious mental illness. These conditions likely contribute to premature cardiovascular disease and a 20 to 30 percent shortened life expectancy in this vulnerable population. Persons with serious mental illness need effective, appropriately tailored behavioral interventions to achieve and maintain weight loss. Psy…	2010	2010	Casagrande, Sarah S; Jerome, Gerald J; Dalcin, Arlene T; Dickerson, Faith B; Anderson, Cheryl A; Appel, Lawrence J; Charleston, Jeanne; Crum, Rosa M; Young, Deborah R; Guallar, Eliseo; Frick, Kevin D; Goldberg, Richard W; Oefinger, Meghan; Finkelstein, Joseph; Gennusa, Joseph V, III; Fred-Omojole, Oladapo; Campbell, Leslie M; Wang, Nae-Yuh; Daumit, Gail L	BMC Psychiatry
Design and baseline characteristics of the ParkFit study, a randomized controlled trial evaluating the effectiveness of a multifaceted behavioral program to increase physical activity in Parkinson patients	Abstract Background: Many patients with Parkinson's disease (PD) lead a sedentary lifestyle. Promotion of physical activities may beneficially affect the clinical presentation of PD, and perhaps even modify the course of PD. However, because of physical and cognitive impairments, patients with PD require specific support to increase their level of physical activity. Methods: We developed the Park…	2010	2010	van Nimwegen, Marlies; Speelman, Arlène D; Smulders, Katrijn; Overeem, Sebastiaan; Borm, George F; Backx, Frank JG; Bloem, Bastiaan R; Munneke, Marten	BMC Neurology
Rationale, design and methods for a randomised and controlled trial to evaluate "Animal Fun" - a program designed to enhance physical and mental health in young children	Abstract Background: Children with poor motor ability have been found to engage less in physical activities than other children, and a lack of physical activity has been linked to problems such as obesity, lowered bone mineral density and cardiovascular risk factors. Furthermore, if children are confident with their fine and gross motor skills, they are more likely to engage in physical activitie…	2010	2010	Piek, Jan P; Straker, Leon M; Jensen, Lynn; Dender, Alma; Barrett, Nicholas C; McLaren, Sue; Roberts, Clare; Reid, Carly; Rooney, Rosie; Packer, Tanya; Bradbury, Greer; Elsley, Sharon	BMC Pediatrics
Does Written Emotional Disclosure about Stress Improve College Students' Academic Performance? Results from Three Randomized, Controlled Studies	Several early studies and subsequent reviews suggested that written emotional disclosure (WED)--writing repeatedly about personal stressful experiences--leads to improved academic performance of college students. A critical review of available studies casts some doubt on this conclusion, so we conducted three randomized, controlled experiments of the effects of WED versus control writing on grade…	2010	2010	Radcliffe, Alison M; Stevenson, Jennifer K; Lumley, Mark A; D'Souza, Pamela J; Kraft, Christina A	Journal of College Student Retention
Computer-based, personalized cognitive training versus classical computer games: a randomized double-blind prospective trial of cognitive stimulation	BACKGROUND: Many studies have suggested that cognitive training can result in cognitive gains in healthy older adults. We investigated whether personalized computerized cognitive training provides greater benefits than those obtained by playing conventional computer games. METHODS: This was a randomized double-blind interventional study. Self-referred healthy older adults (n = 155, 68 ± 7 years o…	2011	2011	Peretz, Chava; Korczyn, Amos D.; Shatil, Evelyn; Aharonson, Vered; Birnboim, Smadar; Giladi, Nir	Neuroepidemiology
Educational Effects of a Vocabulary Intervention on Preschoolers' Word Knowledge and Conceptual Development: A Cluster-Randomized Trial	The purpose of this study was to examine the hypothesis that helping preschoolers learn words through categorization may enhance their ability to retain words and their conceptual properties, acting as a bootstrap for self-learning. We examined this hypothesis by investigating the effects of the World of Words instructional program, a supplemental intervention for children in preschool designed t…	2011	2011	Neuman, Susan B; Newman, Ellen H; Dwyer, Julie	Reading Research Quarterly
Rationale and design of the B-PROOF study, a randomized controlled trial on the effect of supplemental intake of vitamin B12 and folic acid on fracture incidence	Abstract Background: Osteoporosis is a major health problem, and the economic burden is expected to rise due to an increase in life expectancy throughout the world. Current observational evidence suggests that an elevated homocysteine concentration and poor vitamin B 12 and folate status are associated with an increased fracture risk. As vitamin B12 and folate intake and status play a large role …	2011	2011	van Wijngaarden, Janneke P; Dhonukshe-Rutten, Rosalie AM; van Schoor, Natasja M; van der Velde, Nathalie; Swart, Karin MA; Enneman, Anke W; van Dijk, Suzanne C; Brouwer-Brolsma, Elske M; Zillikens, M Carola; van Meurs, Joyce BJ; Brug, Johannes; Uitterlinden, André G; Lips, Paul; de Groot, Lisette CPGM	BMC Geriatrics
The effects of multi-domain versus single-domain cognitive training in non-demented older people: a randomized controlled trial	Doc number: 30 Abstract Background: Whether healthy older people can benefit from cognitive training (CogTr) remains controversial. This study explored the benefits of CogTr in community dwelling, healthy, older adults and compared the effects of single-domain with multi-domain CogTr interventions. Methods: A randomized, controlled, 3-month trial of CogTr with double-blind assessments at baseline…	2012	2012	Cheng, Yan; Wu, Wenyuan; Feng, Wei; Wang, Jiaqi; Chen, You; Shen, Yuan; Li, Qingwei; Zhang, Xu; Li, Chunbo	BMC Medicine
A new mother-child play activity program to decrease parenting stress and improve child cognitive abilities: a cluster randomized controlled trial	BACKGROUND: We propose a new play activity intervention program for mothers and children. Our interdisciplinary program integrates four fields of child-related sciences: neuroscience, preschool pedagogy, developmental psychology, and child and maternal psychiatry. To determine the effect of this intervention on child and mother psychosocial problems related to parenting stress and on the children…	2012	2012	Tachibana, Yoshiyuki; Fukushima, Ai; Saito, Hitomi; Yoneyama, Satoshi; Ushida, Kazuo; Yoneyama, Susumu; Kawashima, Ryuta	PloS One
Physical activity and academic achievement across the curriculum (A + PAAC): rationale and design of a 3-year, cluster-randomized trial	Doc number: 307 Abstract Background: Improving academic achievement and reducing the rates of obesity in elementary school students are both of considerable interest. Increased physical activity during academic instruction time during school offers a potential intervention to address both issues. A program titled "Physical Activity Across the Curriculum" (PAAC) was developed in which classroom te…	2013	2013	Donnelly, Joseph E; Greene, Jerry L; Gibson, Cheryl A; Sullivan, Debra K; Hansen, David M; Hillman, Charles H; Poggio, John; Mayo, Matthew S; Smith, Bryan K; Lambourne, Kate; Herrmann, Stephen D; Scudder, Mark; Betts, Jessica L; Honas, Jeffery J; Washburn, Richard A	BMC Public Health
Randomized controlled trial to evaluate the effects of progressive resistance training compared to progressive muscle relaxation in breast cancer patients undergoing adjuvant radiotherapy: the BEST study	Doc number: 162 Abstract Background: Cancer-related fatigue (CRF) is one of the most common and distressing side effects of cancer and its treatment. During and after radiotherapy breast cancer patients often suffer from CRF which frequently impairs quality of life (QoL). Despite the high prevalence of CRF in breast cancer patients and the severe impact on the physical and emotional well-being, e…	2013	2013	Potthoff, Karin; Schmidt, Martina E; Wiskemann, Joachim; Hof, Holger; Klassen, Oliver; Habermann, Nina; Beckhove, Philipp; Debus, Juergen; Ulrich, Cornelia M; Steindorf, Karen	BMC Cancer
A pilot placebo-controlled, double-blind, and randomized study on the cognition-enhancing benefits of a proprietary chicken meat ingredient in healthy subjects	Doc number: 121 Abstract Background: It has long been postulated that the relative abundance of specific nutrients can affect cognitive processes and emotions. Newly described influences of dietary factors on neuronal function and synaptic plasticity have revealed some of the vital mechanisms that could be responsible for the action of diet on brain health and cognitive function. Here, through a …	2013	2013	Azhar, Zain M; Zubaidah, Jamil O; Norjan, Khin ON; Zhuang, Candy Yi-Jing; Tsang, Fai	Nutrition Journal
The Improvement of Emotion and Attention Regulation after a 6-Week Training of Focused Meditation: A Randomized Controlled Trial	Self-regulatory trainings can be an effective complementary treatment for mental health disorders. We investigated the effects of a six-week-focused meditation training on emotion and attention regulation in undergraduates randomly allocated to a meditation, a relaxation, or a wait-list control group. Assessment comprised a discrimination task that investigates the relationship between attentiona…	2013	2013	Carolina Baptista Menezes; Maria Clara de Paula Couto; Buratto, Luciano G; Erthal, Fatima; Pereira, Mirtes G; Bizarro, Lisiane	Evidence - Based Complementary and Alternative Medicine
Brain training game boosts executive functions, working memory and processing speed in the young adults: a randomized controlled trial	BACKGROUND: Do brain training games work? The beneficial effects of brain training games are expected to transfer to other cognitive functions. Yet in all honesty, beneficial transfer effects of the commercial brain training games in young adults have little scientific basis. Here we investigated the impact of the brain training game (Brain Age) on a wide range of cognitive functions in young adu…	2013	2013	Nouchi, Rui; Taki, Yasuyuki; Takeuchi, Hikaru; Hashizume, Hiroshi; Nozawa, Takayuki; Kambara, Toshimune; Sekiguchi, Atsushi; Miyauchi, Carlos Makoto; Kotozaki, Yuka; Nouchi, Haruka; Kawashima, Ryuta	PloS One
Interventions to improve executive functioning and working memory in school-aged children with AD(H)D: a randomised controlled trial and stepped-care approach	Doc number: 23 Abstract Background: Deficits in executive functioning are of great significance in attention-deficit/hyperactivity disorder (ADHD). One of these executive functions, working memory, plays an important role in academic performance and is often seen as the core deficit of this disorder. There are indications that working memory problems and academic performance can be improved by sc…	2013	2013	van der Donk, Marthe LA; Hiemstra-Beernink, Anne-Claire; Tjeenk-Kalff, Ariane C; van der Leij, Aryan V; Lindauer, Ramón JL	BMC Psychiatry
A Randomized Controlled Neurophysiological Study of a Chinese Chan-Based Mind-Body Intervention in Patients with Major Depressive Disorder	Our previous studies have reported the therapeutic effects of 10-session Chinese Chan-based Dejian mind-body interventions (DMBI) in reducing the intake of antidepressants, improving depressive symptoms, and enhancing the attentional abilities of patients with depression. This study aims to explore the possible neuroelectrophysiological mechanisms underlying the previously reported treatment effe…	2013	2013	Chan, Agnes S; Han, Yvonne M Y; Sze, Sophia L; Wong, Queenie Y; Mei-chun Cheung	Evidence - Based Complementary and Alternative Medicine
V-TIME: a treadmill training program augmented by virtual reality to decrease fall risk in older adults: study design of a randomized controlled trial	Doc number: 15 Abstract Background: Recent work has demonstrated that fall risk can be attributed to cognitive as well as motor deficits. Indeed, everyday walking in complex environments utilizes executive function, dual tasking, planning and scanning, all while walking forward. Pilot studies suggest that a multi-modal intervention that combines treadmill training to target motor function and a v…	2013	2013	Mirelman, Anat; Rochester, Lynn; Reelick, Miriam; Nieuwhof, Freek; Pelosin, Elisa; Abbruzzese, Giovanni; Dockx, Kim; Nieuwboer, Alice; Hausdorff, Jeffrey M	BMC Neurology
Cognitive intervention through a training program for picture book reading in community-dwelling older adults: a randomized controlled trial	Doc number: 122 Abstract Background: Non-pharmacological interventions are expected to be important strategies for reducing the age-adjusted prevalence of senile dementia, considering that complete medical treatment for cognitive decline has not yet been developed. From the viewpoint of long-term continuity of activity, it is necessary to develop various cognitive stimulating programs. The aim of…	2014	2014	Suzuki, Hiroyuki; Kuraoka, Masataka; Yasunaga, Masashi; Nonaka, Kumiko; Sakurai, Ryota; Takeuchi, Rumi; Murayama, Yoh; Ohba, Hiromi; Fujiwara, Yoshinori	BMC Geriatrics
Beneficial effects of treatment with sensory isolation in flotation-tank as a preventive health-care intervention - a randomized controlled pilot trial	Doc number: 417 Abstract Background: Sensory isolation in a flotation tank is a method known for inducing deep relaxation and subsequent positive health effects for patients suffering from e.g. stress or muscle tensions pains. Very few studies have investigated this method as a preventive health-care intervention. The purpose of this study was to evaluate the effects in healthy participants after…	2014	2014	Kjellgren, Anette; Westman, Jessica	BMC Complementary and Alternative Medicine
A pilot three-month sitagliptin treatment increases serum adiponectin level in Japanese patients with type 2 diabetes mellitus- a randomized controlled trial START-J study	Doc number: 96 Abstract Background: The dipeptidyl-peptidase-IV (DPP-4) inhibitors, including sitagliptin, are used for the treatment of type 2 diabetes mellitus (T2DM). Adiponectin, an adipocyte-derived circulating protein, has anti-atherosclerotic and anti-diabetic properties and is effectively elevated in bloodstream by thiazolidinediones, an insulin sensitizer. However, the effect of sitaglip…	2014	2014	Hibuse, Toshiyuki; Maeda, Norikazu; Kishida, Ken; Kimura, Takekazu; Minami, Tomoko; Takeshita, Eriko; Hirata, Ayumu; Nakagawa, Yasuhiko; Kashine, Susumu; Oka, Akemi; Hayashi, Masumi; Nishizawa, Hitoshi; Funahashi, Tohru; Shimomura, Iichiro	Cardiovascular Diabetology
Sleep architecture and cognitive changes in olanzapine-treated patients with depression: A double blind randomized placebo controlled trial	Doc number: 202 Abstract Background: Disturbance in sleep quality is a symptom of Major Depressive Disorder (MDD) and Bipolar Disorder (BD) and thus improving quality of sleep is an important aspect of successful treatment. Here, a prospective, double-blind, randomized, placebo-controlled study examined the effect of olanzapine (an atypical antipsychotic) augmentation therapy on sleep architectur…	2014	2014	Lazowski, Lauren K; Townsend, Ben; Hawken, Emily R; Jokic, Ruzica; du Toit, Regina; Milev, Roumen	BMC Psychiatry
Effectiveness of a primary care based multifactorial intervention to improve frailty parameters in the elderly: a randomised clinical trial: rationale and study design	Doc number: 125 Abstract Background: Frailty is a highly prevalent condition in old age leading to vulnerability and greater risk of adverse health outcomes and disability. Detecting and tackling frailty at an early stage can prevent disability. The purpose of this study is to evaluate the effectiveness of a multifactorial intervention program to modify frailty parameters, muscle strength, and ph…	2014	2014	Romera, Laura; Orfila, Francesc; Segura, Josep Maria; Ramirez, Anna; Möller, Mercedes; Fabra, Maria Lluïsa; Lancho, Santiago; Bastida, Núria; Foz, Gonçal; Fabregat, Maria Assumpta; Martí, Núria; Cullell, Montserrat; Martinez, Dolors; Giné, Maria; Bistuer, Anna; Cendrós, Patricia; Pérez, Elena	BMC Geriatrics
Investigating neural mechanisms of change of cognitive behavioural therapy for chronic fatigue syndrome: a randomized controlled trial	Background Chronic fatigue syndrome (CFS) is characterized by profound and disabling fatigue with no known somatic explanation. Cognitive behavioral therapy (CBT) has proven to be a successful intervention leading to a reduction in fatigue and disability. Based on previous neuroimaging findings, it has been suggested that central neural mechanisms may underlie CFS symptoms and play a role in the …	2015	2015	Marieke E van Der Schaaf; Schmits, Iris C; Roerink, Megan; Geurts, Dirk EM; Toni, Ivan; Roelofs, Karin; De Lange, Floris P; Nater, Urs M; Jos WM van der Meer; Knoop, Hans	BMC Psychiatry
Transcranial Magnetic Stimulation to Address Mild Cognitive Impairment in the Elderly: A Randomized Controlled Study	Transcranial magnetic stimulation (TMS) is a noninvasive brain stimulation technique with potential to improve memory. Mild cognitive impairment (MCI), which still lacks a specific therapy, is a clinical syndrome associated with increased risk of dementia. This study aims to assess the effects of high-frequency repetitive TMS (HF rTMS) on everyday memory of the elderly with MCI. We conducted a do…	2015	2015	Hellen Livia Drumond Marra; Myczkowski, Martin Luiz; Claudia Maia Memoria; Arnaut, Debora; Philip Leite Ribeiro; Carlos Gustavo Sardinha Mansur; Rodrigo Lancelote Alberto; Bianca Boura Bellini; Adriano Alves Fernandes da Silva; Tortella, Gabriel	Behavioural Neurology
Does multicomponent physical exercise with simultaneous cognitive training boost cognitive performance in older adults? A 6-month randomized controlled trial with a 1-year follow-up	BACKGROUND: Cognitive impairment is a health problem that concerns almost every second elderly person. Physical and cognitive training have differential positive effects on cognition, but have been rarely applied in combination. This study evaluates synergistic effects of multicomponent physical exercise complemented with novel simultaneous cognitive training on cognition in older adults. We hypo…	2015	2015	Eggenberger, Patrick; Schumacher, Vera; Angst, Marius; Theill, Nathan; de Bruin, Eling D.	Clinical Interventions in Aging
Influence of a lifestyle intervention in preschool children on physiological and psychological parameters (Ballabeina): study design of a cluster randomized controlled trial	Background: Childhood obesity and physical inactivity are increasing dramatically worldwide. Children of low socioeconomic status and/or children of migrant background are especially at risk. In general, the overall effectiveness of school-based programs on health-related outcomes has been disappointing. A special gap exists for younger children and in high risk groups. Methods/Design: This paper…	2009	2009-03-31	Niederer, Iris; Kriemler, Susi; Zahner, Lukas; Buergi, Flavia; Ebenegger, Vincent; Hartmann, Tim; Meyer, Ursina; Schindler, Christian; Nydegger, Andreas; Marques-Vidal, Pedro; Puder, Jardena J.	Bmc Public Health
Resistance training and executive functions: a 12-month randomized controlled trial	BACKGROUND: Cognitive decline among seniors is a pressing health care issue. Specific exercise training may combat cognitive decline. We compared the effect of once-weekly and twice-weekly resistance training with that of twice-weekly balance and tone exercise training on the performance of executive cognitive functions in senior women. METHODS: In this single-blinded randomized trial, 155 commun…	2010	2010-01-25	Liu-Ambrose, Teresa; Nagamatsu, Lindsay S.; Graf, Peter; Beattie, B. Lynn; Ashe, Maureen C.; Handy, Todd C.	Archives of Internal Medicine
Effects of a physical education intervention on cognitive function in young children: randomized controlled pilot study	BACKGROUND: Randomized controlled trials (RCT) are required to test relationships between physical activity and cognition in children, but these must be informed by exploratory studies. This study aimed to inform future RCT by: conducting practical utility and reliability studies to identify appropriate cognitive outcome measures; piloting an RCT of a 10 week physical education (PE) intervention …	2011	2011-10-28	Fisher, Abigail; Boyle, James M. E.; Paton, James Y.; Tomporowski, Phillip; Watson, Christine; McColl, John H.; Reilly, John J.	BMC pediatrics
Glycaemic index and glycaemic load of breakfast predict cognitive function and mood in school children: a randomised controlled trial	The macronutrient composition of a breakfast that could facilitate performance after an overnight fast remains unclear. As glucose is the brain's major energy source, the interest is in investigating meals differing in their blood glucose-raising potential. Findings vary due to unaccounted differences in glucoregulation, arousal and cortisol secretion. We investigated the effects of meals differi…	2011	2011-11-28	Micha, Renata; Rogers, Peter J; Nelson, Michael	The British Journal of Nutrition
Effects of n-3 fatty acids, EPA v. DHA, on depressive symptoms, quality of life, memory and executive function in older adults with mild cognitive impairment: a 6-month randomized controlled trial	Depressive symptoms may increase the risk of progressing from mild cognitive impairment (MCI) to dementia. Consumption of n-3 PUFA may alleviate both cognitive decline and depression. The aim of the present study was to investigate the benefits of supplementing a diet with n-3 PUFA, DHA and EPA, for depressive symptoms, quality of life (QOL) and cognition in elderly people with MCI. We conducted …	2012	2012-06-14	Sinn, Natalie; Milte, Catherine M; Street, Steven J; Buckley, Jonathan D; Coates, Alison M; Petkov, John; Howe, Peter R C	The British Journal of Nutrition
Mindfulness training improves attentional task performance in incarcerated youth: a group randomized controlled intervention trial	We investigated the impact of cognitive behavioral therapy and mindfulness training (CBT/MT) on attentional task performance in incarcerated adolescents. Attention is a cognitive system necessary for managing cognitive demands and regulating emotions. Yet persistent and intensive demands, such as those experienced during high-stress intervals like incarceration and the events leading to incarcera…	2013	2013-11-08	Leonard, Noelle R.; Jha, Amishi P.; Casarjian, Bethany; Goolsarran, Merissa; Garcia, Cristina; Cleland, Charles M.; Gwadz, Marya V.; Massey, Zohar	Frontiers in Psychology
Effects of a multi-micronutrient-fortified beverage, with and without sugar, on growth and cognition in South African schoolchildren: a randomised, double-blind, controlled intervention	Little is known about the effects of combined micronutrient and sugar consumption on growth and cognition. In the present study, we investigated the effects of micronutrients and sugar, alone and in combination, in a beverage on growth and cognition in schoolchildren. In a 2 × 2 factorial design, children (n 414, 6-11 years) were randomly allocated to consume beverages containing (1) micronutrien…	2013	2013-12-28	Taljaard, Christine; Covic, Namukolo M; van Graan, Averalda E; Kruger, Herculina S; Smuts, Cornelius M; Baumgartner, Jeannine; Kvalsvig, Jane D; Wright, Hattie H; van Stuijvenberg, Martha E; Jerling, Johann C	The British Journal of Nutrition
An Eight Month Randomized Controlled Exercise Intervention Alters Resting State Synchrony in Overweight Children	Children with low aerobic fitness have altered brain function compared to higher-fit children. This study examined the effect of an 8-month exercise intervention on resting state synchrony. Twenty-two sedentary, overweight (body mass index >= 85th percentile) children 8-11 years old were randomly assigned to one of two after-school programs: aerobic exercise (n = 13) or sedentary attention contro…	2014	2014-01-03	Krafft, C. E.; Pierce, J. E.; Schwarz, N. F.; Chi, L.; Weinberger, A. L.; Schaeffer, D. J.; Rodrigue, A. L.; Camchong, J.; Allison, J. D.; Yanasak, N. E.; Liu, T.; Davis, C. L.; McDowell, J. E.	Neuroscience
Brain training with non-action video games enhances aspects of cognition in older adults: a randomized controlled trial	Age-related cognitive and brain declines can result in functional deterioration in many cognitive domains, dependency, and dementia. A major goal of aging research is to investigate methods that help to maintain brain health, cognition, independent living and wellbeing in older adults. This randomized controlled study investigated the effects of 20 1-h non-action video game training sessions with…	2014	2014-10-14	Ballesteros, Soledad; Prieto, Antonio; Mayas, Julia; Toril, Pilar; Pita, Carmen; Ponce de Leon, Laura; Reales, Jose M.; Waterworth, John	Frontiers in Aging Neuroscience
Ketamine interactions with biomarkers of stress: A randomized placebo-controlled repeated measures resting-state fMRI and PCASL pilot study in healthy men	Ketamine, an NMDA receptor antagonist, is increasingly used to study the link between glutamatergic signaling dysregulation and mood and chronic pain disorders. Glutamatergic neurotransmission and stress corticosteroids (cortisol in human) are critical for Ca2+mediated neuroplasticity and behavioral adaptation. The mechanisms of action of glutamatergic neurotransmission and stress corticosteroids…	2015	2015-03-01	Khalili-Mahani, Najmeh; Niesters, Marieke; van Osch, Matthias J; Oitzl, Melly; Veer, Ilya; de Rooij, Mark; van Gerven, Joop; van Buchem, Mark A; Beckmann, Christian F; Rombouts, Serge ARB; Dahan, Albert	NeuroImage
The effects of Nordic school meals on concentration and school performance in 8- to 11-year-old children in the OPUS School Meal Study: a cluster-randomised, controlled, cross-over trial	It is widely assumed that nutrition can improve school performance in children; however, evidence remains limited and inconclusive. In the present study, we investigated whether serving healthy school meals influenced concentration and school performance of 8- to 11-year-old Danish children. The OPUS (Optimal well-being, development and health for Danish children through a healthy New Nordic Diet…	2015	2015-04-28	Sørensen, Louise B; Dyssegaard, Camilla B; Damsgaard, Camilla T; Petersen, Rikke A; Dalskov, Stine-Mathilde; Hjorth, Mads F; Andersen, Rikke; Tetens, Inge; Ritz, Christian; Astrup, Arne; Lauritzen, Lotte; Michaelsen, Kim F; Egelund, Niels	The British Journal of Nutrition
A 2 year multidomain intervention of diet, exercise, cognitive training, and vascular risk monitoring versus control to prevent cognitive decline in at-risk elderly people (FINGER): a randomised controlled trial	Modifiable vascular and lifestyle-related risk factors have been associated with dementia risk in observational studies. In the Finnish Geriatric Intervention Study to Prevent Cognitive Impairment and Disability (FINGER), a proof-of-concept randomised controlled trial, we aimed to assess a multidomain approach to prevent cognitive decline in at-risk elderly people from the general population. Met…	2015	2015-06-06	Ngandu, Tiia; Lehtisalo, Jenni; Solomon, Alina; Levälahti, Esko; Ahtiluoto, Satu; Antikainen, Riitta; Bäckman, Lars; Hänninen, Tuomo; Jula, Antti; Laatikainen, Tiina; Lindström, Jaana; Mangialasche, Francesca; Paajanen, Teemu; Pajala, Satu; Peltonen, Markku; Rauramaa, Rainer; Stigsdotter-Neely, Anna; Strandberg, Timo; Tuomilehto, Jaakko; Soininen, Hilkka; Kivipelto, Miia	The Lancet
The Effects of Supplementation with a Vitamin and Mineral Complex with Guaraná Prior to Fasted Exercise on Affect, Exertion, Cognitive Performance, and Substrate Metabolism: A Randomized Controlled Trial	Exercise undertaken in a fasted state can lead to higher post-exercise mental fatigue. The administration of a vitamin and mineral complex with guaraná (MVM + G) has been shown to attenuate mental fatigue and improve performance during cognitively demanding tasks. This placebo-controlled, double-blind, randomized, balanced cross-over study examined the effect of MVM + G consumed prior to morning …	2015	2015-07-27	Veasey, Rachel C.; Haskell-Ramsay, Crystal F.; Kennedy, David O.; Wishart, Karl; Maggini, Silvia; Fuchs, Caspar J.; Stevenson, Emma J.	Nutrients
The effect of group-based exercise on cognitive performance and mood in seniors residing in intermediate care and self-care retirement facilities: a randomised controlled trial	OBJECTIVE: To determine the effect of a general group-based exercise programme on cognitive performance and mood among seniors without dementia living in retirement villages. DESIGN: Randomised controlled trial. SETTING: Four intermediate care and four self-care retirement village sites in Sydney, Australia. PARTICIPANTS: 154 seniors (19 men, 135 women; age range 62 to 95 years), who were residen…	2009	2009-08	Brown, A. K.; Liu-Ambrose, T.; Tate, R.; Lord, S. R.	British Journal of Sports Medicine
A small-scale randomized controlled trial of the revised new forest parenting programme for preschoolers with attention deficit hyperactivity disorder	The revised new forest parenting programme (NFPP) is an 8-week psychological intervention designed to treat ADHD in preschool children by targeting, amongst other things, both underlying impairments in self-regulation and the quality of mother-child interactions. Forty-one children were randomized to either the revised NFPP or treatment as usual conditions. Outcomes were ADHD and ODD symptoms mea…	2009	2009-10	Thompson, Margaret J; J; Laver-bradbury, Cathy; Ayres, Michelle; Le Poidevin, Emma; Mead, Sarah; Dodds, Catherine; Psychogiou, Lamprini; Bitsakou, Paraskevi; Daley, David; Weeks, Anne; Brotman, Laurie Miller; Abikoff, Howard; Thompson, Penny; Sonuga-barke, Edmund J; S	European Child & Adolescent Psychiatry
Systematic video game training in surgical novices improves performance in virtual reality endoscopic surgical simulators: a prospective randomized study	BACKGROUND: Previous studies have shown a correlation between previous video game experience and performance in minimally invasive surgical simulators. The hypothesis is that systematic video game training with high visual-spatial demands and visual similarity to endoscopy would show a transfer effect on performance in virtual reality endoscopic surgical simulation. METHODS: A prospective randomi…	2009	2009-11	Schlickum, Marcus Kolga; Hedman, Leif; Enochsson, Lars; Kjellin, Ann; Felländer-Tsai, Li	World Journal of Surgery
Armodafinil for Treatment of Excessive Sleepiness Associated With Shift Work Disorder: A Randomized Controlled Study	To assess the effect of armodafinil, 150 mg, on the physiologic propensity for sleep and cognitive performance during usual night shift hours in patients with excessive sleepiness associated with chronic (> or =3 months) shift work disorder (SWD) of moderate or greater severity. This 12-week, randomized controlled study was conducted at 42 sleep research facilities in North America from April 2 t…	2009	2009-11	Czeisler, Charles A, PHD, MD; Walsh, James K, PHD; Wesnes, Keith A, PHD; Arora, Sanjay, PHD; Roth, Thomas, PHD	Mayo Clinic Proceedings
Complex mental and physical activity in older women and cognitive performance: a 6-month randomized controlled trial	BACKGROUND: Several reports suggest beneficial impacts of either physical or mental activity on cognitive function in old age. However, the differential effects of complex mental and physical activities on cognitive performance in humans remain to be clarified. METHODS: This randomized controlled trial evaluates a cognitive and a physical standardized 6-month activity intervention (3 x 1.5 h/wk) …	2010	2010-06	Klusmann, Verena; Evers, Andrea; Schwarzer, Ralf; Schlattmann, Peter; Reischies, Friedel M.; Heuser, Isabella; Dimeo, Fernando C.	The Journals of Gerontology. Series A, Biological Sciences and Medical Sciences
Mindfulness Training Modifies Cognitive, Affective, and Physiological Mechanisms Implicated in Alcohol Dependence: Results of a Randomized Controlled Pilot Trial[dagger]	Mindfulness training may disrupt the risk chain of stress-precipitated alcohol relapse. In 2008, 53 alcohol-dependent adults (mean age = 40.3) recruited from a therapeutic community located in the urban southeastern U.S. were randomized to mindfulness training or a support group. Most participants were male (79.2%), African American (60.4%), and earned less than $20,000 annually (52.8%). Self-rep…	2010	2010-06	Garland, Eric L, PhD, LCSW; Gaylord, Susan A, PhD; Boettiger, Charlotte A, PhD; Howard, Matthew O, PhD	Journal of Psychoactive Drugs
Neuroprotective Effects of Cognitive Enhancement Therapy Against Gray Matter Loss in Early Schizophrenia Results From a 2-Year Randomized Controlled Trial	Context: Cognitive rehabilitation has shown efficacy in improving cognition in patients with schizophrenia but the underlying neurobiologic changes that occur during these treatments and support cognitive improvement are not well known. Objective: To examine differential changes in brain morphology in early course schizophrenia during cognitive rehabilitation vs supportive therapy. Design: Random…	2010	2010-07	Eack, Shaun M.; Hogarty, Gerard E.; Cho, Raymond Y.; Prasad, Konasale M. R.; Greenwald, Deborah P.; Hogarty, Susan S.; Keshavan, Matcheri S.	Archives of General Psychiatry
Neurofeedback Intervention in Fibromyalgia Syndrome; a Randomized, Controlled, Rater Blind Clinical Trial	We designed a randomized, rater blind study to assess the efficacy of EEG Biofeedback (Neurofeedback-NFB) in patients with fibromyalgia syndrome (FMS). Eighteen patients received twenty sessions of NFB-sensory motor rhythm (SMR) treatment (NFB group) during 4 weeks, and eighteen patients were given 10 mg per day escitalopram treatment (control group) for 8 weeks. Visual Analog Scales for pain and…	2010	2010-12	Kayiran, Sadi; Dursun, Erbil; Dursun, Nigar; Ermutlu, Numan; Karamürsel, Sacit	Applied Psychophysiology and Biofeedback
Cognitive stimulation therapy in the treatment of neuropsychiatric symptoms in Alzheimer's disease: a randomized controlled trial	Objective: To determine the efficacy of cognitive stimulation therapy (CST) in the treatment of neuropsychiatric symptoms in patients with Alzheimer's disease. Design: A randomized, controlled, rater-blind clinical trial. Setting: The military sanatorium. Subjects: Thirty-two patients with mild to moderate Alzheimer's disease exhibiting marked neuropsychiatric symptoms were included in the study.…	2010	2010-12	Niu, Yi-Xuan; Tan, Ji-Ping; Guan, Jin-Qun; Zhang, Zeng-Qiang; Wang, Lu-Ning	Clinical Rehabilitation
Influence of zolpidem and sleep inertia on balance and cognition during nighttime awakening: a randomized placebo-controlled trial	OBJECTIVES: To determine whether sleep inertia (grogginess upon awakening from sleep) with or without zolpidem impairs walking stability and cognition during awakenings from sleep. DESIGN: Three within-subject conditions hypnotic medication (zolpidem), placebo (sleep inertia), and wakefulness control randomized using balanced Latin square design. SETTING: Sleep laboratory. PARTICIPANTS: Twelve ol…	2011	2011-01	Frey, Danielle J.; Ortega, Justus D.; Wiseman, Courtney; Farley, Claire T.; Wright, Kenneth P.	Journal of the American Geriatrics Society
Improving Attention and Preventing Reading Difficulties among Low-Income First-Graders: A Randomized Study	Students' inattention is predictive of reading problems and of non-response to effective reading intervention. In this randomized study, 58 first-grade classrooms located in 30 schools were assigned to a control condition or to one of two intervention conditions. In these last two conditions, peer-tutoring activities were conducted to improve classroom reading instruction. In one of the intervent…	2011	2011-03	Dion, Eric; Roux, Catherine; Landry, Danika; Fuchs, Douglas; Wehby, Joseph; Dupéré, Véronique	Prevention Science
Effect of Methylphenidate and/or Levodopa Combined with Physiotherapy on Mood and Cognition after Stroke: A Randomized, Double-Blind, Placebo-Controlled Trial	Background/Aim: Stimulant medications can enhance mood and cognition in stroke rehabilitation, but human clinical trial results are inconclusive. We sought to prospectively study the effects of levodopa (LD) and/or methylphenidate (MPH) in combination with physiotherapy on mood and cognition following stroke in human subjects. Methods: Ischemic stroke patients were enrolled in our study 15 to 180…	2011	2011-08	Delbari, Ahmad; Salman-roghani, Reza; Lokk, Johan	European Neurology
Effect of Psychological Skills Training During Military Survival School: A Randomized, Controlled Field Study	In this randomized, controlled field study, we examined the effects of a brief psychological skills training (PST) intervention on stress responses during military survival school. A second purpose was to build upon prior research in this unique environment by extending the follow-up window to 3 months. Baseline subjective distress (dissociative) symptoms were measured in 65 male military subject…	2011	2011-12	Taylor, Marcus K, PhD; Stanfill, Katherine E, MA; Padilla, Genieleah A, BA; Markham, Amanda E, MPH; Ward, Michael D, PhD; Koehler, Matthew M, DO; Anglero, Antonio, MSC USN; Adams, Barry D, MSC USN	Military Medicine
Computerised Cognitive Training for Older Persons With Mild Cognitive Impairment: A Pilot Study Using a Randomised Controlled Trial Design	The results of a pilot randomised controlled trial of computerised cognitive training in older adults with mild cognitive impairment (MCI) are reported. Participants (N = 25) were randomised into either the treatment or waitlist training groups. Sixteen participants completed the 30-session computerised cognitive training program using exercises that target a range of cognitive functions includin…	2011	2011-12	Finn, Maurice; McDonald, Skye	Brain Impairment
Effects of dual task balance training on dual task performance in elderly people: a randomized controlled trial	Objective: To investigate the effects of dual task balance training in the elderly on standing postural control while performing a cognitive task. Design: A randomized two-group parallel controlled trial. Participants: Forty-three subjects (all >65 years old) were enrolled in the study and were assigned randomly to either an experimental group (n=21) or a control group (n=22). Interventions: Subj…	2012	2012-01	Hiyamizu, Makoto; Morioka, Shu; Shomoto, Koji; Shimada, Tomoaki	Clinical Rehabilitation
Improved cognitive performance following supplementation with a mixed-grain diet in high school students: A randomized controlled trial	Adolescence is a stage of rapid growth, when rich nutritional supplementation is important. Maintaining optimal cognitive functioning is critical in high school students, who are under considerable academic pressure. The objectives of this study were to identify the effects of a 9-wk randomly assigned diet of mixed grains versus a regular diet on cognitive performance and on levels of plasma brai…	2012	2012-02	Chung, Young-Chul; Park, Chul-Hyun; Kwon, Hye-Kyung; Park, Young-Min; Kim, Young Soo; Doo, Jae-Kyun; Shin, Dong-Hwa; Jung, Eun-Soo; Oh, Mi-Ra; Chae, Soo Wan	Nutrition
The Effects of Guided Imagery on Affect, Cognition, and Pain in Older Adults in Residential Care: A Randomized Controlled Study from Thailand	Few studies have examined the effects of guided imagery on older adults in residential care. This study aimed to evaluate the outcome of group-delivered guided imagery over a 16-day period with a sample of Thai older adults in residential care (N = 31). Residents were randomly allocated to the guided imagery treatment group or usual care control group. No significant differences were found betwee…	2012	2012-04	Elsegood, Kelly J., BA (Hons), DClinPsych; Wongpakaran, Nahathai, MD, FRCPsychT	Research in Gerontological Nursing
A four-week walking exercise programme in patients with knee osteoarthritis improves the ability of dual-task performance: a randomized controlled trial	Objective: To investigate whether a four-week walking exercise programme in patients with knee osteoarthritis improves the ability of dual-task performance in older adults with knee osteoarthritis. Design: A randomized controlled trial with two groups: a walking group and a control group. Subjects: Forty older adults with knee osteoarthritis, 20 participants in each group. Intervention: The walki…	2012	2012-05	Hiyama, Yoshinori; Yamada, Minoru; Kitagawa, Akira; Tei, Norihiro; Okada, Shuichi	Clinical Rehabilitation
Effect of medical Qigong on cognitive function, quality of life, and a biomarker of inflammation in cancer patients: a randomized controlled trial	Cancer patients often experience diminished cognitive function (CF) and quality of life (QOL) due to the side effects of treatment and the disease symptoms. This study evaluates the effects of medical Qigong (MQ; combination of gentle exercise and meditation) on CF, QOL, and inflammation in cancer patients. Eighty-one cancer patients recruited between October 2007 and May 2008 were randomly assig…	2012	2012-06	Oh, Byeongsang; Butow, Phyllis N; Mullan, Barbara A; Clarke, Stephen J; Beale, Philip J; Pavlakis, Nick; Lee, Myeong Soo; Rosenthal, David S; Larkey, Linda; Vardy, Janette	Supportive Care in Cancer
The Benefits of Expressive Writing on Autobiographical Memory Specificity: A Randomized Controlled Trial	This study provided a preliminary investigation of an expressive writing intervention, which has been found to reduce rumination and avoidance, in reducing overgeneral memory among 207 non-depressed college students. Participants were randomized to one of three writing conditions: traditional expressive writing, specific expressive writing, or control writing. Study results showed that compared t…	2012	2012-06	Maestas, Kacey Little; Rude, Stephanie S	Cognitive Therapy and Research
Effect of vitamin D3 supplementation on relapses, disease progression, and measures of function in persons with multiple sclerosis: exploratory outcomes from a double-blind randomised controlled trial	High vitamin D levels may reduce the risk of relapses and disease progression in multiple sclerosis. This 96-week randomised controlled trial was designed to assess the effect of vitamin D(3) supplementation on bone mineral density in persons with multiple sclerosis. Supplementation with 20,000 IU vitamin D(3) weekly raised median serum 25-hydroxy vitamin D (25[OH]D) to 121 nmol/L. The modified i…	2012	2012-08	Kampman, Margitta T; Steffensen, Linn H; Mellgren, Svein I; Jørgensen, Lone	Multiple Sclerosis Journal
Impact of Anthelminthic Treatment in Pregnancy and Childhood on Immunisations, Infections and Eczema in Childhood: A Randomised Controlled Trial	Background Helminth infections may modulate immune responses to unrelated pathogens and allergens; these effects may commence prenatally. We addressed the hypothesis that anthelminthic treatment in pregnancy and early childhood would improve responses to immunisation and modulate disease incidence in early childhood with both beneficial and detrimental effects. Methods and Findings A randomised, …	2012	2012-12	Ndibazza, Juliet; Mpairwe, Harriet; Webb, Emily L; Mawa, Patrice A; Nampijja, Margaret; Muhangi, Lawrence; Kihembo, Macklyn; Lule, Swaib A; Rutebarika, Diana; Apule, Barbara; Akello, Florence; Akurut, Hellen; Oduru, Gloria; Naniima, Peter; Kizito, Dennison; Kizza, Moses; Kizindo, Robert; Tweyongere, Robert; Alcock, Katherine J; Muwanga, Moses; Elliott, Alison M	PLoS One
Docosahexaenoic acid-concentrated fish oil supplementation in subjects with mild cognitive impairment (MCI): a 12-month randomised, double-blind, placebo-controlled trial	Epidemiological studies have suggested a beneficial effect of fish oil supplementation in halting the initial progression of Alzheimerâ[euro](TM)s disease. However, it remains unclear whether fish oil affects cognitive function in older people with mild cognitive impairment (MCI). This study investigated the effects of fish oil supplementation on cognitive function in elderly person with MCI. Thi…	2013	2013-02	Lee, Lai Kuan; Shahar, Suzana; Chin, Ai-vyrn; Yusoff, Noor Aini; Mohd	Psychopharmacology
Putting Brain Training to the Test in the Workplace: A Randomized, Blinded, Multisite, Active-Controlled Trial	Background Cognitive training (CT) is effective at improving cognitive outcomes in children with and without clinical impairment as well as older individuals. Yet whether CT is of any preventative health benefit to working age adults is controversial. Our objective was therefore to investigate the real-world efficacy of CT in the workplace, involving employees from across the working-age spectrum…	2013	2013-03	Borness, Catherine; Proudfoot, Judith; Crawford, John; Valenzuela, Michael	PLoS One
A randomized controlled pilot study assessing the feasibility of combined motor-cognitive training and its effect on gait characteristics in the elderly	(1) To develop a motor-cognition training programme; (2) to evaluate the ability to recruit and retain elderly people; (3) to assess the effects of the interventions. Pilot randomized controlled trial. Assisted living facility. Sixteen subjects (11 female) living in an assisted living facility were randomized to a motor or motor-cognition group. Both groups received machine-driven strength traini…	2013	2013-03	de Bruin, Eling D; van het Reve, Eva; Murer, Kurt	Clinical Rehabilitation
A Randomized Controlled Trial of Multicomponent Exercise in Older Adults with Mild Cognitive Impairment	Background To examine the effect of multicomponent exercise program on memory function in older adults with mild cognitive impairment (MCI), and identify biomarkers associated with improvement of cognitive functions. Methodology/Principal Findings Subjects were 100 older adults (mean age, 75 years) with MCI. The subjects were classified to an amnestic MCI group (n = 50) with neuroimaging measures…	2013	2013-04	Suzuki, Takao; Shimada, Hiroyuki; Makizako, Hyuma; Doi, Takehiko; Yoshida, Daisuke; Ito, Kengo; Shimokata, Hiroshi; Washimi, Yukihiko; Endo, Hidetoshi; Kato, Takashi	PLoS One
Antifatigue Effects of Panax ginseng C.A. Meyer: A Randomised, Double-Blind, Placebo-Controlled Trial	The present study investigated the antifatigue effects of Panax ginseng C.A. Meyer in 90 subjects (21 men and 69 women) with idiopathic chronic fatigue (ICF) in a randomised, double-blind, placebo-controlled and parallel designed trial. A bespoke 20% ethanol extract of P. ginseng (1 g or 2 g day-1) or a placebo was administered to each group for 4 weeks, and then fatigue severity was monitored us…	2013	2013-04	Kim, Hyeong-Geug; Cho, Jung-Hyo; Yoo, Sa-Ra; Lee, Jin-Seok; Han, Jong-Min; Lee, Nam-Hun; Ahn, Yo-Chan; Son, Chang-Gue	PLoS One
Influence of Erythropoietin on Cognitive Performance during Experimental Hypoglycemia in Patients with Type 1 Diabetes Mellitus: A Randomized Cross-Over Trial	Introduction The incidence of severe hypoglycemia in type 1 diabetes has not decreased over the past decades. New treatment modalities minimizing the risk of hypoglycemic episodes and attenuating hypoglycemic cognitive dysfunction are needed. We studied if treatment with the neuroprotective hormone erythropoietin (EPO) enhances cognitive function during hypoglycemia. Materials and Methods Eleven …	2013	2013-04	Kristensen, Peter Lommer; Pedersen-Bjergaard, Ulrik; Kjær, Troels Wesenberg; Olsen, Niels Vidiendal; Dela, Flemming; Holst, Jens Juul; Faber, Jens; Tarnow, Lise; Thorsteinsson, Birger	PLoS One
Randomized clinical trial of yoga-based intervention in residents from elderly homes: Effects on cognitive function	Context: Elderly have increased risk for cognitive impairment and dementia. Yoga therapy may be helpful in elderly to improve cognitive function. Aims: We examined the benefits of yoga-based intervention compared with waitlist control group on cognitive function in the residents of elderly homes. Settings and Design: Single blind controlled study with block randomization of elderly homes. Materia…	2013	2013-07	Hariprasad, V; Koparde, V; Sivakumar, P; Varambally, S; Thirthalli, J; Varghese, M; Basavaraddi, I; Gangadhar, B	Indian Journal of Psychiatry
Goal Management Training of Executive Functions in Patients with Spina Bifida: A Randomized Controlled Trial	Abstract Executive dysfunction causes significant real-life disability for patients with spina bifida (SB). However, no previous research has been directed toward the amelioration of executive functioning deficits amongst persons with SB. Goal Management Training (GMT) is a compensatory cognitive rehabilitation approach, addressing underlying deficits in sustained attention to improve executive f…	2013	2013-07	Stubberud, Jan; Langenbahn, Donna; Levine, Brian; Stanghelle, Johan; Schanke, Anne-Kristine	Journal of the International Neuropsychological Society : JINS
A Chinese Mind-Body Exercise Improves Self-Control of Children with Autism: A Randomized Controlled Trial	Self-control problems commonly manifest as temper outbursts and repetitive/rigid/impulsive behaviors, in children with autism spectrum disorders (ASD), which often contributes to learning difficulties and caregiver burden. The present study aims to compare the effect of a traditional Chinese Chan-based mind-body exercise, Nei Yang Gong, with that of the conventional Progressive Muscle Relaxation …	2013	2013-07	Chan, Agnes S; Sze, Sophia L; Siu, Nicolson Y; Lau, Eliza M; Cheung, Mei-chun	PLoS One
Working memory training in survivors of pediatric cancer: a randomized pilot study	OBJECTIVES: Survivors of pediatric brain tumors and acute lymphoblastic leukemia (ALL) are at increased risk for neurocognitive deficits, but few empirically supported treatment options exist. We examined the feasibility and preliminary efficacy of a home-based, computerized working memory training program, CogmedRM, with survivors of childhood cancer. METHODS: Survivors of brain tumors or ALL (n…	2013	2013-08	Hardy, Kristina K.; Willard, Victoria W.; Allen, Taryn M.; Bonner, Melanie J.	Psycho-Oncology
Cognitive rehabilitation for early post-surgery inpatients affected by primary brain tumor: a randomized, controlled trial	Cognitive impairment is one of the most common neurological disorders in neuro-oncological patients and exerts a deep negative impact on quality of life interfering with familiar, social and career-related activities. To test the effectiveness of early cognitive rehabilitation treatment for inpatients affected by primary brain tumors. Out of 109 consecutive patients enrolled in the study, 58 pati…	2013	2013-08	Zucchella, Chiara; Capone, Annarita; Codella, Valentina; De Nunzio, Alessandro Marco; Vecchione, Carmine; Sandrini, Giorgio; Pace, Andrea; Pierelli, Francesco; Bartolo, Michelangelo	Journal of Neuro - Oncology
Efficacy of Functional Remediation in Bipolar Disorder: A Multicenter Randomized Controlled Study	Objective: The authors sought to assess the efficacy of functional remediation, a novel intervention program, on functional improvement in a sample of euthymic patients with bipolar disorder. Method: In a multicenter, randomized, rater-blind clinical trial involving 239 outpatients with DSM-IV bipolar disorder, functional remediation (N=77) was compared with psychoeducation (N=82) and treatment a…	2013	2013-08	Torrent, Carla; Bonnin, Caterina del Mar; Martínez-Arán, Anabel; Valle, Jesús; Amann, Benedikt L; González-Pinto, Ana; Crespo, José Manuel; Ibáñez, Ángela; Garcia-Portilla, Mari Paz; Tabarés-Seisdedos, Rafael; Arango, Celso; Colom, Francesc; Solé, Brisa; Pacchiarotti, Isabella; Rosa, Adriane R; Ayuso-Mateos, Jose Luis; Anaya, Celia; Fernández, Patricia; Landín-Romero, Ramon; Alonso-Lana, Silvia; …	The American Journal of Psychiatry
A small-scale randomized controlled trial of the self-help version of the New Forest Parent Training Programme for children with ADHD symptoms	The efficacy of a self-help parent training programme for children with attention deficit hyperactivity disorder (ADHD) was evaluated. The New Forest Parenting Programme Self-help (NFPP-SH) is a 6-week written self-help psychological intervention designed to treat childhood ADHD. Forty-three children were randomised to either NFPP-SH intervention or a waiting list control group. Outcomes were chi…	2013	2013-09	Daley, David; O'brien, Michelle	European Child & Adolescent Psychiatry
RCT of Working Memory Training in ADHD: Long-Term Near-Transfer Effects	Objective The aim of the study is to evaluate the long-term near-transfer effects of computerized working memory (WM) training on standard WM tasks in children with Attention-Deficit/Hyperactivity Disorder (ADHD). Method Sixty-seven children aged 10-12 years in Vestfold/Telemark counties (Norway) diagnosed with F90.0 Hyperkinetic disorder (ICD-10) were randomly assigned to training or control gro…	2013	2013-12	Hovik, Kjell Tore; Saunes, Brit-Kari; Aarlien, Anne Kristine; Egeland, Jens	PLoS One
An 8-Month Randomized Controlled Exercise Trial Alters Brain Activation During Cognitive Tasks in Overweight Children	Children who are less fit reportedly have lower performance on tests of cognitive control and differences in brain function. This study examined the effect of an exercise intervention on brain function during two cognitive control tasks in overweight children. Participants included 43 unfit, overweight (BMI ≥ 85th percentile) children 8- to 11-years old (91% Black), who were randomly divided into…	2014	2014-01	Krafft, Cynthia E; Schwarz, Nicolette F; Chi, Lingxi; Weinberger, Abby L; Schaeffer, David J; Pierce, Jordan E; Rodrigue, Amanda L; Yanasak, Nathan E; Miller, Patricia H; Tomporowski, Phillip D; Davis, Catherine L; McDowell, Jennifer E	Obesity
Neuropsychological rehabilitation does not improve cognitive performance but reduces perceived cognitive deficits in patients with multiple sclerosis: a randomised, controlled, multi-centre trial	There is preliminary evidence on the positive effects of neuropsychological rehabilitation on cognition in multiple sclerosis (MS), but the generalisability of the findings is limited by methodological problems. The aim of the present study was to determine the effects of strategy-oriented neuropsychological rehabilitation on MS. A total of 102 relapsing-remitting MS patients with subjective and …	2014	2014-01	Mäntynen, Anu; Rosti-Otajärvi, Eija; Koivisto, Keijo; Lilja, Arja; Huhtala, Heini; Hämäläinen, Päivi	Multiple Sclerosis Journal
Computer-assisted rehabilitation of attention in patients with multiple sclerosis: results of a randomized, double-blind trial	There is controversial information on the efficacy of cognitive rehabilitation in multiple sclerosis (MS). The objective of this paper is to test a home-based computerized program for retraining attention dysfunction in MS. Relapsing-remitting patients who failed > 2 tests of attention on an extensive neuropsychological battery were randomized to specific or nonspecific computerized training (ST,…	2014	2014-01	Amato, MP; Goretti, B; Viterbo, RG; Portaccio, E; Niccolai, C; Hakiki, B; Iaffaldano, P; Trojano, M	Multiple Sclerosis Journal
An occupation-based strategy training approach to managing age-related executive changes: a pilot randomized controlled trial	To determine the feasibility of recruitment and retention of healthy older adults and the effectiveness of an intervention designed to manage age-related executive changes. A pilot randomized controlled trial. Research centre and participants' homes. Nineteen healthy, community dwelling older adults with complaints of cognitive difficulties and everyday problems, but no evidence of mild cognitive…	2014	2014-02	Dawson, Deirdre; Richardson, Julie; Troyer, Angie; Binns, Malcolm; Clark, Amanda; Polatajko, Helene; Winocur, Gordon; Hunt, Anne; Bar, Yael	Clinical Rehabilitation
Effects of exercise on fitness and cognition in progressive MS: a randomized, controlled pilot trial	Exercise may have beneficial effects on both well-being and walking ability in multiple sclerosis (MS). Exercise is shown to be neuroprotective in rodents and may also enhance cognitive function in humans. It may, therefore, be particularly useful for MS patients with pronounced neurodegeneration. To investigate the potential of standardized exercise as a therapeutic intervention for progressive …	2014	2014-03	Briken, S; Gold, SM; Patra, S; Vettorazzi, E; Harbs, D; Tallner, A; Ketels, G; Schulz, KH; Heesen, C	Multiple Sclerosis Journal
A dual-task home-based rehabilitation programme for improving balance control in patients with acquired brain injury: a single-blind, randomized controlled pilot study	To evaluate the safety, feasibility and effectiveness of a dual-task home-based rehabilitation programme on balance impairments among adult patients with acquired brain injury. Single-blind, randomized controlled pilot study. Single rehabilitation centre. Sixteen participants between 12 and 18 months post-acquired brain injury with balance impairments and a score <10 seconds on the One-Leg Stance…	2014	2014-04	Peirone, Eliana; Goria, Paolo Filiberto; Anselmino, Arianna	Clinical Rehabilitation
Four weeks of combination exercise training improved executive functions, episodic memory, and processing speed in healthy elderly people: evidence from a randomized controlled trial	Previous reports have described that long-term combination exercise training improves cognitive functions in healthy elderly people. This study investigates the effects of 4 weeks of short-term combination exercise training on various cognitive functions of elderly people. We conducted a single-blinded randomized controlled trial with two parallel groups. Sixty-four healthy older adults were assi…	2014	2014-04	Nouchi, Rui; Taki, Yasuyuki; Takeuchi, Hikaru; Sekiguchi, Atsushi; Hashizume, Hiroshi; Nozawa, Takayuki; Nouchi, Haruka; Kawashima, Ryuta	Age (Dordrecht, Netherlands)
Effect of resistance-type exercise training with or without protein supplementation on cognitive functioning in frail and pre-frail elderly: secondary analysis of a randomized, double-blind, placebo-controlled trial	Physical activity has been proposed as one of the most effective strategies to prevent cognitive decline. Protein supplementation may exert an additive effect. The effect of resistance-type exercise training with or without protein supplementation on cognitive functioning in frail and pre-frail elderly people was assessed in a secondary analysis. Two 24-week, double-blind, randomized, placebo-con…	2014	2014-04	van de Rest, Ondine; van der Zwaluw, Nikita L.; Tieland, Michael; Adam, Jos J.; Hiddink, Gert Jan; van Loon, Luc J. C.; de Groot, Lisette C. P. G. M.	Mechanisms of Ageing and Development
No Sustained Attention Differences in a Longitudinal Randomized Trial Comparing Mindfulness Based Stress Reduction versus Active Control	Background Mindfulness Based Stress Reduction (MBSR) is a secular form of meditation training. The vast majority of the extant literature investigating the health effects of mindfulness interventions relies on wait-list control comparisons. Previous studies have found that meditation training over several months is associated with improvements in cognitive control and attention. Methodology/Princ…	2014	2014-06	MacCoon, Donal G; MacLean, Katherine A; Davidson, Richard J; Saron, Clifford D; Lutz, Antoine	PLoS One
A naturalistic, randomized, controlled trial combining cognitive remediation with cognitive-behavioural therapy after first-episode non-affective psychosis	Background Cognitive remediation (CR) preceding cognitive-behavioural therapy for psychosis (CBTp) was trialled within routine clinical services, with the hypothesis that following first-episode non-affective psychosis CR would enhance CBTp efficacy by improving neuropsychological performance. Method A total of 61 patients with DSM-IV non-affective psychoses waiting for routine CBTp were randomiz…	2014	2014-07	Drake, R J; Day, C J; Picucci, R; Warburton, J; Larkin, W; Husain, N; Reeder, C; Wykes, T; Marshall, M	Psychological Medicine
A Randomized Controlled Trial of the Effectiveness of Computer-Assisted Cognitive Remediation (CACR) in Adolescents with Psychosis or at High Risk of Psychosis	Background: Computer assisted cognitive remediation (CACR) was demonstrated to be efficient in improving cognitive deficits in adults with psychosis. However, scarce studies explored the outcome of CACR in adolescents with psychosis or at high risk. Aims: To investigate the effectiveness of a computer-assisted cognitive remediation (CACR) program in adolescents with psychosis or at high risk. Met…	2014	2014-07	Holzer, Laurent; Urben, Sebastien; Passini, Christina Moses; Jaugey, Laure; Herzog, Michael H; Halfon, Olivier; Pihet, Sandrine	Behavioural and Cognitive Psychotherapy
Zinc Supplementation Sustained Normative Neurodevelopment in a Randomized, Controlled Trial of Peruvian Infants Aged 6-18 Months1,2	A double-blind, randomized clinical trial was conducted to determine the effects of prevention of zinc deficiency on cognitive and sensorimotor development during infancy. At 6 mo of age, infants were randomly assigned to be administered a daily liquid supplement containing 10 mg/d of zinc (zinc sulfate), 10 mg/d of iron (ferrous sulfate), and 0.5 mg/d of copper (copper oxide), or an identical da…	2014	2014-08	Colombo, John; Zavaleta, Nelly; Kannass, Kathleen N; Lazarte, Fabiola; Albornoz, Carla; Kapa, Leah L; Caulfield, Laura E	The Journal of Nutrition
Effects of Two Chinese Herbal Formulae for the Treatment of Moderate to Severe Stable Chronic Obstructive Pulmonary Disease: A Multicenter, Double-Blind, Randomized Controlled Trial	Objective The study aims to evaluate the efficacy and safety of two Chinese herbal formulae for the treatment of stable COPD. Methods A multicenter, double-blind, double-dummy, and randomized controlled trial (RCT) was conducted. All groups were treated with additional conventional medicines. There were a 6-month treatment and a 12-month follow-up for 5 times. Primary outcomes included lung funct…	2014	2014-08	Wang, Genfa; Liu, Baojun; Cao, Yuxue; Du, Yijie; Zhang, Hongying; Luo, Qingli; Li, Bei; Wu, Jinfeng; Lv, Yubao; Sun, Jing; Jin, Hualiang; Wei, Kai; Zhao, Zhengxiao; Kong, Lingwen; Zhou, Xianmei; Miao, Qing; Wang, Gang; Zhou, Qingwei; Dong, Jingcheng	PLoS One
Effects of the FITKids Randomized Controlled Trial on Executive Control and Brain Function	OBJECTIVE: To assess the effect of a physical activity (PA) intervention on brain and behavioral indices of executive control in preadolescent children. METHODS: Two hundred twenty-one children (7-9 years) were randomly assigned to a 9-month afterschool PA program or a wait-list control. In addition to changes in fitness (maximal oxygen consumption), electrical activity in the brain (P3-ERP) and …	2014	2014-10	Hillman, Charles H.; Pontifex, Matthew B.; Castelli, Darla M.; Khan, Naiman A.; Raine, Lauren B.; Scudder, Mark R.; Drollette, Eric S.; Moore, Robert D.; Wu, Chien-Ting; Kamijo, Keita	Pediatrics
Effects of functional tasks exercise on older adults with cognitive impairment at risk of Alzheimer's disease: a randomised controlled trial	Objective: the aim of this study was to compare the effects of a functional tasks exercise programme to a cognitive training programme in older adults with mild cognitive impairment. Design: a single-blind randomised control trial with the intervention group compared with an active control group. Setting: out-patient clinic. Participants: older adults with mild cognitive impairment (n = 83) aged …	2014	2014-11	Law, Lawla L. F.; Barnett, Fiona; Yau, Matthew K.; Gray, Marion A.	Age and Ageing
Measuring the impact of cognitive and psychosocial interventions in persons with mild cognitive impairment with a randomized single-blind controlled trial: rationale and design of the MEMO+ study	Background: Several studies have suggested that cognitive training is a potentially effective way to improve cognition and postpone cognitive decline in older adults with mild cognitive impairment (MCI). The MEMO+ study is a randomized, controlled, single-blind trial designed to test the efficacy, specificity, and long-term effect of a cognitive training intervention and a psychosocial interventi…	2015	2015-03	Bier, Nathalie; Grenier, Sébastien; Brodeur, Catherine; Gauthier, Serge; Gilbert, Brigitte; Hudon, Carol; Lepage, Émilie; Ouellet, Marie-Christine; Viscogliosi, Chantal; Belleville, Sylvie	International Psychogeriatrics
Safety and Feasibility of Transcranial Direct Current Stimulation in Pediatric Hemiparesis: Randomized Controlled Preliminary Study	The primary objective of this study was to explore the safety and feasibility of single-session tDCS through an adverse events profile and symptom assessment within a double-blind, randomized placebo-controlled preliminary study in children with congenital hemiparesis. A secondary objective was to assess the stability of hand and cognitive function. The study was conducted in a university pediatr…	2015	2015-03	Gillick, Bernadette T; Feyma, Tim; Menk, Jeremiah; Usset, Michelle; Vaith, Amy; Wood, Teddi Jean; Worthington, Rebecca; Krach, Linda E	Physical Therapy
Would Older Adults with Mild Cognitive Impairment Adhere to and Benefit from a Structured Lifestyle Activity Intervention to Enhance Cognition?: A Cluster Randomized Controlled Trial	Background Epidemiologic evidence suggests that cognitive and physical activities are associated with better cognition in late life. The present study was conducted to examine the possible benefits of four structured lifestyle activity interventions and compare their effectiveness in optimizing cognition for older adults with mild cognitive impairment (MCI). Method and Findings This was a 12-mont…	2015	2015-03	Lam, Linda Chiu-wa; Chan, Wai Chi; Leung, Tony; Fung, Ada Wai-tung; Leung, Edward Man-fuk	PLoS One
Acute mood but not cognitive improvements following administration of a single multivitamin and mineral supplement in healthy women aged 50 and above: a randomised controlled trial	A number of randomised controlled trials have indicated that multivitamin/mineral supplementation for a period of 4 weeks or greater can enhance mood and cognition. To date, no studies have investigated whether a single multivitamin dose can benefit mental function in older adults. This study investigated the acute effects of a single multivitamin and mineral and herbal (MVMH) supplement versus p…	2015	2015-06	Macpherson, H; Rowsell, R; Cox, K H; M; Scholey, A; Pipingas, A	Age
Effects of Short-Term Cognitive Remediation on Cognitive Dysfunction in Partially or Fully Remitted Individuals with Bipolar Disorder: Results of a Randomised Controlled Trial	Introduction Cognitive dysfunction is common in bipolar disorder (BD) but is not sufficiently addressed by current treatments. Cognitive remediation (CR) may improve cognitive function in schizophrenia but no randomised controlled trial has investigated this intervention in BD. The present study aimed to investigate the effects of CR on persistent cognitive dysfunction in BD. Method Patients with…	2015	2015-06	Demant, Kirsa M; Vinberg, Maj; Kessing, Lars V; Miskowiak, Kamilla W	PLoS One
A 12-Week Physical and Cognitive Exercise Program Can Improve Cognitive Function and Neural Efficiency in Community-Dwelling Older Adults: A Randomized Controlled Trial	ObjectivesTo investigate whether a 12-week physical and cognitive exercise program can improve cognitive function and brain activation efficiency in community-dwelling older adults. DesignRandomized controlled trial. SettingKyoto, Japan. ParticipantsCommunity-dwelling older adults (N=48) were randomized into an exercise group (n=24) and a control group (n=24). InterventionExercise group participa…	2015	2015-07	Nishiguchi, Shu; Yamada, Minoru; Tanigawa, Takanori; Sekiyama, Kaoru; Kawagoe, Toshikazu; Suzuki, Maki; Yoshikawa, Sakiko; Abe, Nobuhito; Otsuka, Yuki; Nakai, Ryusuke; Aoyama, Tomoki; Tsuboyama, Tadao	Journal of the American Geriatrics Society
A randomized, controlled, single-blind, 6-month pilot study to evaluate the efficacy of MS-Line!: a cognitive rehabilitation programme for patients with multiple sclerosis	Background: MS-Line! was created to provide an effective treatment for cognitive impairment in multiple sclerosis (MS) patients. Objective: To assess the efficacy of MS-Line!. Methods: A randomized, controlled, single-blind, 6-month pilot study. Patients were randomly assigned to an experimental group (cognitive rehabilitation with the programme) or to a control group (no cognitive rehabilitation…	2015	2015-09	Gich, Jordi; Freixanet, Jordi; García, Rafael; Vilanova, Joan Carles; Genís, David; Silva, Yolanda; Montalban, Xavier; Ramió-Torrentà, Lluís	Multiple Sclerosis Journal
Exercise improves cognition in Parkinson's disease: The PRET-PD randomized, clinical trial	BACKGROUND: This article reports on the findings of the effect of two structured exercise interventions on secondary cognitive outcomes that were gathered as part of the Progressive Resistance Exercise Training in Parkinson's disease (PD) randomized, controlled trial. METHODS: This study was a prospective, parallel-group, single-center trial. Fifty-one nondemented patients with mild-to-moderate P…	2015	2015-10	David, Fabian J.; Robichaud, Julie A.; Leurgans, Sue E.; Poon, Cynthia; Kohrt, Wendy M.; Goldman, Jennifer G.; Comella, Cynthia L.; Vaillancourt, David E.; Corcos, Daniel M.	Movement Disorders: Official Journal of the Movement Disorder Society
Effect of Standing or Walking at a Workstation on Cognitive Function: A Randomized Counterbalanced Trial	OBJECTIVE: In the present study, we examined the effect of working while seated, while standing, or while walking on measures of short-term memory, working memory, selective and sustained attention, and information-processing speed. BACKGROUND: The advent of computer-based technology has revolutionized the adult workplace, such that average adult full-time employees spend the majority of their wo…	2016	2016-02	Bantoft, Christina; Summers, Mathew J.; Tranent, Peter J.; Palmer, Matthew A.; Cooley, P. Dean; Pedersen, Scott J.	Human Factors
Shaolin Dan Tian Breathing Fosters Relaxed and Attentive Mind: A Randomized Controlled Neuro-Electrophysiological Study	Neuro-electrophysiological studies on meditative breathing revealed its association with either a relaxed or an attentive state. The present study aimed to investigate whether the Shaolin Dan Tian Breathing (DTB) technique, which consists of the Passive and Active subtypes and can be considered as a relaxation exercise and Qigong, would induce both relaxed and attentive states. Twenty-two adults …	2011	2011	Chan, Agnes S; Mei-Chun Cheung; Sze, Sophia L; Leung, Winnie Wing-Man; Shi, Dejian	Evidence - Based Complementary and Alternative Medicine
Effects of supplementation with n-3 polyunsaturated fatty acids on cognitive performance and cardiometabolic risk markers in healthy 51 to 72 years old subjects: a randomized controlled cross-over study	Doc number: 99 Abstract Background: Higher plasma n-3 polyunsaturated fatty acids (PUFA) have been associated with a lower risk of age related cognitive decline, and to beneficially affect cardiometabolic risk factors. A relation exists between metabolic disorders such as diabetes type 2 and cognitive decline. Results regarding the potential effects of n-3 PUFA on risk factors in healthy subjects…	2012	2012	Nilsson, Anne; Radeborg, Karl; Salo, Ilkka; Björck, Inger	Nutrition Journal
Does combined cognitive training and physical activity training enhance cognitive abilities more than either alone? A four-condition randomized controlled trial among healthy older adults	Cognitive training and aerobic training are known to improve cognitive functions. To examine the separate and combined effects of such training on cognitive performance, four groups of healthy older adults embarked on a 4 months cognitive and/or mild aerobic training. A first group [n = 33, mean age = 80 (66-90)] engaged in cognitive training, a second [n = 29, mean age = 81 (65-89)] in mild aero…	2013	2013	Shatil, Evelyn	Frontiers in Aging Neuroscience
Plasticity of attentional functions in older adults after non-action video game training: a randomized controlled trial	A major goal of recent research in aging has been to examine cognitive plasticity in older adults and its capacity to counteract cognitive decline. The aim of the present study was to investigate whether older adults could benefit from brain training with video games in a cross-modal oddball task designed to assess distraction and alertness. Twenty-seven healthy older adults participated in the s…	2014	2014	Mayas, Julia; Parmentier, Fabrice B. R.; Andrés, Pilar; Ballesteros, Soledad	PloS One
Efficacy of an executive function intervention programme in MS: a placebo-controlled and pseudo-randomized trial	We evaluated a rehabilitation programme for executive deficits in multiple sclerosis patients by comparing outcome scores of a cognitive intervention group (CIG; n = 11) with those of a placebo group (n = 14) and an untreated group (n = 15). Executive functioning and verbal learning improved significantly more in the CIG. The treatment effect on verbal learning was still present at 1-year follow-…	2010	2010-09	Fink, Frauke; Rischkau, Eva; Butt, Martina; Klein, Jan; Eling, Paul; Hildebrandt, Helmut	Multiple Sclerosis
Mobilisation of Hematopoietic CD34+ Precursor Cells in Patients with Acute Stroke Is Safe - Results of an Open-Labeled Non Randomized Phase I/II Trial	Background Regenerative strategies in the treatment of acute stroke may have great potential. Hematopoietic growth factors mobilize hematopoietic stem cells and may convey neuroprotective effects. We examined the safety, potential functional and structural changes, and CD34+ cell-mobilization characteristics of G-CSF treatment in patients with acute ischemic stroke. Methods and Results Three coho…	2011	2011-08	Boy, Sandra; Sauerbruch, Sophie; Kraemer, Mathias; Schormann, Thorsten; Schlachetzki, Felix; Schuierer, Gerhard; Luerding, Ralph; Hennemann, Burkhard; Orso, Evelyn; Dabringhaus, Andreas; Winkler, Jürgen; Bogdahn, Ulrich; Group, Study	PLoS One
A Randomized Trial on Mineralocorticoid Receptor Blockade in Men: Effects on Stress Responses, Selective Attention, and Memory	Corticosteroids, released in high amounts after stress, exert their effects via two different receptors in the brain: glucocorticoid receptors (GRs) and mineralocorticoid receptors (MRs). GRs have a role in normalizing stress-induced effects and promoting consolidation, while MRs are thought to be important in determining the threshold for activation of the hypothalamic-pituitary-adrenal (HPA) ax…	2011	2011-12	Cornelisse, Sandra; Joëls, Marian; Smeets, Tom	Neuropsychopharmacology
The effect of aerobic exercise on cortical architecture in patients with chronic schizophrenia: a randomized controlled MRI study	Via influencing brain plasticity, aerobic exercise could contribute to the treatment of schizophrenia patients. As previously shown, physical exercise increases hippocampus volume and improves short-term memory. We now investigated gray matter density and brain surface expansion in this sample using MRI-based cortical pattern matching methods. Comparing schizophrenia patients to healthy controls …	2013	2013-09	Falkai, Peter; Malchow, Berend; Wobrock, Thomas; Gruber, Oliver; Schmitt, Andrea; Honer, William G; Pajonk, Frank-gerald; Sun, Frank; Cannon, Tyrone D	European Archives of Psychiatry and Clinical Neuroscience
Group memory rehabilitation for people with multiple sclerosis: a feasibility randomized controlled trial		2014	2014-06	Carr, Sara E; das Nair, Roshan; Schwartz, Annette F; Lincoln, Nadina B	Clinical Rehabilitation
Raloxifene adjunctive therapy for postmenopausal women suffering from chronic schizophrenia: a randomized double-blind and placebo controlled trial	Cumulative evidence from epidemiological, preclinical and clinical studies suggests estrogens may have psychoprotective effects in schizophrenic patients. Selective Estrogen Receptor Modulators could have therapeutic benefits in schizophrenia for both sexes without being hazardous to gynecological tissues or having feminizing effects. This was an 8-week, parallel-group, placebo-controlled trial u…	2014	2014-07	Kianimehr, Gilda; Fatehi, Farzad; Hashempoor, Sara; Khodaei-Ardakani, Mohammad-Reza; Rezaei, Farzin; Nazari, Ali; Kashani, Ladan; Akhondzadeh, Shahin	Daru
Exercise and Cognitive Function: A Randomized Controlled Trial Examining Acute Exercise and Free-Living Physical Activity and Sedentary Effects		2015	2015-04	Loprinzi, Paul D, PhD; Kane, Christy J, PhD	Mayo Clinic Proceedings
Aerobic Exercise Improves Cognition for Older Adults with Glucose Intolerance, A Risk Factor for Alzheimer's Disease	Impaired glucose regulation is a defining characteristic of type 2 diabetes mellitus (T2DM) pathology and has been linked to increased risk of cognitive impairment and dementia. Although the benefits of aerobic exercise for physical health are well-documented, exercise effects on cognition have not been examined for older adults with poor glucose regulation associated with prediabetes and early T…	2010	2010	Baker, Laura D.; Frank, Laura L.; Foster-Schubert, Karen; Green, Pattie S.; Wilkinson, Charles W.; McTiernan, Anne; Cholerton, Brenna A.; Plymate, Stephen R.; Fishel, Mark A.; Watson, G. Stennis; Duncan, Glen E.; Mehta, Pankaj D.; Craft, Suzanne	Journal of Alzheimers Disease
Functional neural correlates of reduced physiological falls risk	Abstract Background: It is currently unclear whether the function of brain regions associated with executive cognitive processing are independently associated with reduced physiological falls risk. If these are related, it would suggest that the development of interventions targeted at improving executive neurocognitive function would be an effective new approach for reducing physiological falls …	2011	2011	Nagamatsu, Lindsay S; Hsu, Chun Liang; Handy, Todd C; Liu-Ambrose, Teresa	Behavioral and Brain Functions
Chemotherapy-induced cognitive impairment is associated with decreases in cell proliferation and histone modifications	Abstract Background: In this study, we examined the effects of cyclophosphamide, methothrexate, and 5-Fluorouracil (CMF) drug combination on various aspects of learning and memory. We also examined the effects of CMF on cell proliferation and chromatin remodeling as possible underlying mechanisms to explain chemotherapy-associated cognitive dysfunction. Twenty-four adult female Wistar rats were i…	2011	2011	Briones, Teresita L; Woods, Julie	BMC Neuroscience
Cognitive demand and predictive adaptational responses in dynamic stability control	We studied the effects of a concurrent cognitive task on predictive motor control, a feedforward mechanism of dynamic stability control, during disturbed gait in young and old adults. Thirty-two young and 27 elderly male healthy subjects participated and were randomly assigned to either control or dual task groups. By means of a covered exchangeable element the surface condition on a gangway coul…	2012	2012	Bohm, Sebastian; Mersmann, Falk; Bierbaum, Stefanie; Dietrich, Ralf; Arampatzis, Adamantios	Journal of Biomechanics
Acute aerobic exercise impacts selective attention: an exceptional boost in lower-income children	Educational research suggests that lower-income children exhibit poor general executive functioning relative to their higher-income peers. Meanwhile, sports psychology research suggests that an acute bout of aerobic exercise improves executive functioning in children. Yet, it has never been determined if such exercise (1) specifically improves the selective attention aspect of executive functioni…	2012	2012	Tine, Michele T.; Butler, Allison G.	Educational Psychology
The Effect Of Speed Reading Instruction On Japanese High School Students' English Reading Comprehension And Vocabulary Development	This study investigated the effects of a six-month course in speed reading in three areas of reading proficiency development: 1) general reading comprehension, 2) knowledge of high-frequency vocabulary, and 3) reading-rate and accuracy. The participants (N = 105) were Japanese students studying English as a foreign language in Grade 10 at a Japanese private senior high school, randomly assigned t…	2012	2012	Underwood, Paul; Myskow, Gordon; Hattori, Takahiko	Journal of International Education Research
The Efficacy of Eye Movement Desensitization Reprocessing in Resolving the Trauma Caused by the Road Accidents in the Sultanate of Oman	The purpose of this study was to investigate the efficacy of eye movement desensitization and reprocessing (EMDR) in resolving the trauma caused by the road accidents in the Sultanate of Oman. Three measures were used in this study, trauma symptoms inventory, subjective units of distress scale and the dissociative experiences scale. Fifty-one volunteer participants from the University of Nizwa st…	2012	2012	Aldahadha, Basim; Al-Harthy, Hussain; Sulaiman, Suad	Journal of Instructional Psychology
Effects of multimedia characteristics on novice CAD learners' practice performance	Based on the assumption that providing information using multiple modalities improves learners' performance, the teaching of computer-aided design (CAD) in the built environment is increasingly shifting from printed material to a multimedia approach. Yet, the evidence base suggests that presenting information by using multiple modalities does not always enhance learning. This paper reports on an …	2012	2012	Mahdjoubi, Lamine; A-Rahman, Mosa Allafi	Architectural Engineering and Design Management
Comparative effectiveness of videotape and handout mode of instructions for teaching exercises: skill retention in normal children	Abstract Background: Teaching of motor skills is fundamental to physical therapy practice. In order to optimize the benefits of these teaching and training efforts, various forms of patient education material are developed and handed out to patients. One very important fact has been overlooked. While comparative effectiveness of various modes of instruction has been studied in adults, attention h…	2012	2012	Gupta, Garima; Sehgal, Stuti	Pediatric Rheumatology
Training-induced improvement of response selection and error detection in aging assessed by task switching: effects of cognitive, physical, and relaxation training	Cognitive control functions decline with increasing age. The present study examines if different types of group-based and trainer-guided training effectively enhance performance of older adults in a task switching task, and how this expected enhancement is reflected in changes of cognitive functions, as measured in electrophysiological brain activity (event-related potentials). One hundred forty-…	2012	2012	Gajewski, Patrick D.; Falkenstein, Michael	Frontiers in Human Neuroscience
Obstacle course: Users' maneuverability and movement efficiency when using Otto Bock C-Leg, Otto Bock 3R60, and CaTech SNS prosthetic knee joints	The performance and movement efficiency of prosthesis users while traversing a multisectional obstacle course (OC) were evaluated using a crossover design with random allocation of three prosthetic knee joints: the SNS (CaTech; Dayton, Ohio) the C-Leg (Otto Bock; Duderstadt, Germany), and the 3R60 (Otto Bock). Twelve users completed the OC twice with each joint, once without and once with a menta…	2012	2012	Meier, Margrit R, PhD; Hansen, Andrew H, PhD; Gard, Steven A, PhD; McFadyen, Angus K, PhD	Journal of Rehabilitation Research and Development
Advancement of physical process by mental activation: a prospective controlled study	According to the literature, patients who are significantly impaired by physical mobility limitations can be rehabilitated if the patient's working memory is used to capacity. The conclusion that periodic mental activity improves physical rehabilitation should be evaluated. This is a prospective, controlled, and randomized open study of patients who underwent a total hip arthroplasty (THA). Sixte…	2012	2012	Lehrl, S.; Gusinde, J.; Schulz-Drost, S.; Rein, A.; Schlechtweg, P. M.; Jacob, H.; Krinner, S.; Gelse, K.; Pauser, J.; Brem, Matthias H.	Journal of Rehabilitation Research and Development
Managing Cognitive Load While Teaching Human Gait to Novice Health Care Science Students	Human working memory becomes increasingly prone to errors as learning tasks become more complex. This is of particular importance to those working with instruction that requires the novice learner to simultaneously maintain and manipulate many elements of information for learning with understanding to occur. Under such circumstances, cognitive load theory provides support for the use of instructi…	2013	2013	Pociask, Fredrick D, PT, PhD, OCS; Morrison, Gary R, EdD; Reid, Kristina R, PT, MS	Journal of Physical Therapy Education
Effects of a commercial product containing guaraná on psychological well-being, anxiety and mood: a single-blind, placebo-controlled study in healthy subjects	Doc number: 9 Abstract Background: Guaranà (Paulinia cupana ) seed extracts are increasingly popular worldwide for their stimulant, cognitive and behavioral effects. To assess the effects on psychological well-being, anxiety and mood of a commercially available guaranà preparation taken regularly over several days according to the labelled dosages and instructions, 27 healthy volunteers were enro…	2013	2013	Silvestrini, Gianluca Ivan; Marino, Franca; Cosentino, Marco	Journal of Negative Results in Biomedicine
A diet based on multiple functional concepts improves cognitive performance in healthy subjects	Doc number: 49 Abstract Background: Disorders such as the metabolic syndrome (MetS), impaired glucose tolerance and diabetes, are associated with increased risk of cognitive decline. Also several of the individual key features that define the MetS, e.g. hypertension, impaired glucose regulation, dyslipidemia, obesity, and inflammation, are related to an increased risk of cognitive decline. Conseq…	2013	2013	Nilsson, Anne; Tovar, Juscelino; Johansson, Maria; Radeborg, Karl; Björck, Inger	Nutrition & Metabolism
Development of an Adaptive Learning System with Multiple Perspectives based on Students' Learning Styles and Cognitive Styles	In this study, an adaptive learning system is developed by taking multiple dimensions of personalized features into account. A personalized presentation module is proposed for developing adaptive learning systems based on the field dependent/independent cognitive style model and the eight dimensions of Felder-Silverman's learning style. An experiment has been conducted to evaluate the performance…	2013	2013	Yang, Tzu-Chi; Hwang, Gwo-Jen; Yang, Stephen Jen-Hwa	Journal of Educational Technology & Society
Pomegranate Juice Augments Memory and fMRI Activity in Middle-Aged and Older Adults with Mild Memory Complaints	Despite increasing emphasis on the potential of dietary antioxidants in preventing memory loss and on diet as a precursor of neurological health, rigorous studies investigating the cognitive effects of foods and their components are rare. Recent animal studies have reported memory and other cognitive benefits of polyphenols, found abundantly in pomegranate juice. We performed a preliminary, place…	2013	2013	Bookheimer, Susan Y; Renner, Brian A; Ekstrom, Arne; Li, Zhaoping; Henning, Susanne M; Brown, Jesse A; Jones, Mike; Moody, Teena; Small, Gary W	Evidence - Based Complementary and Alternative Medicine
Using Singing and Movement to Teach Pre-reading Skills and Word Reading to Kindergarten Children: An Exploratory Study	Kindergarten classrooms were randomly assigned to a songs group (n = 44) that used choral singing and movement to teach phonological skills, letter-sounds, and word reading, or to a control group (n = 49) where children received their regular language and literacy programs for equal amounts of time. The songs group teaching involved choral singing and movements created for the project to teach ph…	2014	2014	Walton, Patrick	Language and Literacy
Detecting and Correcting Fractions Computation Error Patterns	This article describes a follow-up analysis of findings from a randomized study that tested the efficacy of a blended version of Enhanced Anchored Instruction (EAI) designed to improve both the computation and problem-solving performances of middle school students with disabilities. The goals of the secondary analysis were to track overall error patterns of students in computing with fractions an…	2014	2014	Bottge, Brian A; Ma, Xin; Gassaway, Linda; Butler, Mark; Toland, Michael D	Exceptional Children
The LIFE Cognition Study: design and baseline characteristics	Observational studies have shown beneficial relationships between exercise and cognitive function. Some clinical trials have also demonstrated improvements in cognitive function in response to moderate-high intensity aerobic exercise; however, these have been limited by relatively small sample sizes and short durations. The Lifestyle Interventions and Independence for Elders (LIFE) Study is the l…	2014	2014	Sink, Kaycee M.; Espeland, Mark A.; Rushing, Julia; Castro, Cynthia M.; Church, Timothy S.; Cohen, Ronald; Gill, Thomas M.; Henkin, Leora; Jennings, Janine M.; Kerwin, Diana R.; Manini, Todd M.; Myers, Valerie; Pahor, Marco; Reid, Kieran F.; Woolard, Nancy; Rapp, Stephen R.; Williamson, Jeff D.	Clinical Interventions in Aging
Virtual exercises to promote cognitive recovery in stroke patients: the comparison between head mounted displays versus screen exposure methods	The cognitive rehabilitation of stroke is often related to improvement of executive functioning through repeated and systematic training of memory and attention exercises, in which virtual reality may be a valid approach. Several devices have been used as visual outputs. Head mounted displays (HMD) and desktop screens displays are among them. HMDs are usually perceived as being more immersive tha…	2014	2014	Gamito, Pedro; Oliveira, Jorge; Santos, Nuno; Pacheco, José; Morais, Diogo; Saraiva, Tomaz; Soares, Fábio; Mayor, Catarina S; Barata, Ana F	International Journal on Disability and Human Development
Does rTMS Alter Neurocognitive Functioning in Patients with Panic Disorder/Agoraphobia? An fNIRS-Based Investigation of Prefrontal Activation during a Cognitive Task and Its Modulation via Sham-Controlled rTMS	Objectives. Neurobiologically, panic disorder (PD) is supposed to be characterised by cerebral hypofrontality. Via functional near-infrared spectroscopy (fNIRS), we investigated whether prefrontal hypoactivity during cognitive tasks in PD-patients compared to healthy controls (HC) could be replicated. As intermittent theta burst stimulation (iTBS) modulates cortical activity, we furthermore inves…	2014	2014	Deppermann, Saskia; Vennewald, Nadja; Diemer, Julia; Sickinger, Stephanie; Haeussinger, Florian B; Notzon, Swantje; Laeger, Inga; Arolt, Volker; Ann-Christine Ehlis; Zwanzger, Peter; Fallgatter, Andreas J	BioMed Research International
Aerobic exercise increases hippocampal volume and improves memory in multiple sclerosis: preliminary findings	Multiple sclerosis leads to prominent hippocampal atrophy, which is linked to memory deficits. Indeed, 50% of multiple sclerosis patients suffer memory impairment, with negative consequences for quality of life. There are currently no effective memory treatments for multiple sclerosis either pharmacological or behavioral. Aerobic exercise improves memory and promotes hippocampal neurogenesis in n…	2014	2014	Leavitt, V. M.; Cirnigliaro, C.; Cohen, A.; Farag, A.; Brooks, M.; Wecht, J. M.; Wylie, G. R.; Chiaravalloti, N. D.; DeLuca, J.; Sumowski, J. F.	Neurocase
Facilitation of corticospinal excitability by virtual reality exercise following anodal transcranial direct current stimulation in healthy volunteers and subacute stroke subjects	Doc number: 124 Abstract Background: There is growing evidence that the combination of non-invasive brain stimulation and motor skill training is an effective new treatment option in neurorehabilitation. We investigated the beneficial effects of the application of transcranial direct current stimulation (tDCS) combined with virtual reality (VR) motor training. Methods: In total, 15 healthy, right…	2014	2014	Kim, Yeun Joon; Ku, Jeonghun; Cho, Sangwoo; Kim, Hyun Jung; Cho, Yun Kyung; Lim, Teo; Kang, Youn Joo	Journal of Neuroengineering and Rehabilitation
MENTAL TAI CHI-BASED EXERCISE PROGRAMME VS TAI-CHI FOR INDIAN MULTIPLE SCLEROSIS PATIENTS: A PILOT STUDY	Background: Tai Chi postures have recently been shown in a number of randomized controlled trials to improve balance and posture in a variety of patient groups. Balance and mobility are problems commonly encountered by people with Multiple Scle- rosis (MS). This pilot study examines the effect of Tai-Chi ± Mental practise on balance, gait and mobility in people with MS. Objective: To determine th…	2014	2014	Kaur, Darshpreet; Kaur, Kirandeep; Billore, Nidhi; Kumar, Gunjan; Singh, Ajay Kumar	International Journal of Current Research and Review
The effect of basic neuropsychological interventions on performance of students with dyscalculia	Objective: There are many children who have dyscalculia. The aim of the current research was to investigate the effectiveness of basic neuropsychological interventions in improving mathematics performance of girl students (8-9 years old) with dyscalculia (mathematics learning disabilities) in Isfahan city of Iran. Material and methods: The research method was experimental with pretest, posttest a…	2014	2014	Faramarzi, Salar; Sadri, Sima	Neuropsychiatria i Neuropsychologia
Working memory training and poetry-based stimulation programs: Are there differences in cognitive outcome in healthy older adults?	BACKGROUND: Neuropsychological interventions have been mainly applied with clinical populations, in spite of the need of preventing negative changes across life span. Among the few studies of cognitive stimulation in elderly, surprisingly there is no enough research comparing direct and indirect active stimulation programs. OBJECTIVE: This study aims to verify wheter there are differences between…	2014	2014	Zimmermann, Nicolle; Amodeo, Maria Teresa	NeuroRehabilitation
Isoflavones inhibit poly(I:C)-induced serum, brain, and skin inflammatory mediators - relevance to chronic fatigue syndrome	Doc number: 168 Abstract Background: Chronic Fatigue Syndrome (CFS) is a neuroimmunoendocrine disease affecting about 1% of the US population, mostly women. It is characterized by debilitating fatigue for six or more months in the absence of cancer or other systemic diseases. Many CFS patients also have fibromyalgia and skin hypersensitivity that worsen with stress. Corticotropin-releasing hormon…	2014	2014	Vasiadi, Magdalini; Newman, Jennifer; Theoharides, Theoharis C	Journal of Neuroinflammation
Effect of trataka on cognitive functions in the elderly	Background: Trataka, a type of yoga practice is considered to improve cognitive functions. The aim of this study was to test the effect of trataka on cognitive functions of the elderly. Materials and Methods: Elderly subjects were recruited based on inclusion and exclusion criteria (n = 60) and randomly divided using randomized block design into two groups: Trataka and wait list control group. Tr…	2014	2014	Talwadkar, Shubhada; Jagannathan, Aarti; Raghuram, Nagarathna	International Journal of Yoga
The effectiveness of racket-sport intervention on visual perception and executive functions in children with mild intellectual disabilities and borderline intellectual functioning	Background: This study aimed to investigate the effects of table tennis training (TTT) versus standard occupational therapy (SOT) on visual perception and executive functions in school-age children with mild intellectual disabilities and borderline intellectual functioning. Subjects and methods: Children (n=91) were randomly assigned to intervention with either SOT (n=46, 20 females, mean age = 1…	2015	2015	Chen, Ming-De; Tsai, Hsien-Yu; Wang, Chih-Chung; Wuang, Yee-Pay	Neuropsychiatric Disease and Treatment
Yoga May Mitigate Decreases in High School Grades	This study involves an exploratory examination of the effects of a 12-week school-based yoga intervention on changes in grade point average (GPA) in 9th and 10th grade students. Participants included 95 high school students who had registered for physical education (PE) in spring 2010. PE class sections were group randomized to receive either a yoga intervention or a PE-as-usual control condition…	2015	2015	Butzer, Bethany; Max van Over; Noggle Taylor, Jessica J; Sat Bir S. Khalsa	Evidence - Based Complementary and Alternative Medicine
Effects of Different Types of Cognitive Training on Cognitive Function, Brain Structure, and Driving Safety in Senior Daily Drivers: A Pilot Study	Background. Increasing proportion of the elderly in the driving population raises the importance of assuring their safety. We explored the effects of three different types of cognitive training on the cognitive function, brain structure, and driving safety of the elderly. Methods. Thirty-seven healthy elderly daily drivers were randomly assigned to one of three training groups: Group V trained in…	2015	2015	Nozawa, Takayuki; Taki, Yasuyuki; Kanno, Akitake; Akimoto, Yoritaka; Ihara, Mizuki; Yokoyama, Ryoichi; Kotozaki, Yuka; Nouchi, Rui; Sekiguchi, Atsushi; Takeuchi, Hikaru; Carlos Makoto Miyauchi; Ogawa, Takeshi; Goto, Takakuni; Sunda, Takashi; Shimizu, Toshiyuki	Behavioural Neurology
Does Short-Term Dietary Omega-3 Fatty Acid Supplementation Influence Brain Hippocampus Gene Expression of Zinc Transporter-3?	Dietary omega-3 fatty acids have been recognized to improve brain cognitive function. Deficiency leads to dysfunctional zinc metabolism associated with learning and memory impairment. The objective of this study is to explore the effect of short-term dietary omega-3 fatty acids on hippocampus gene expression at the molecular level in relation to spatial recognition memory in mice. A total of 24 m…	2015	2015	Sopian, Nur Farhana Ahmad; Ajat, Mokrish; Shafie, Nurul' Izzati; Noor, Mohd Hezmee Mohd; Ebrahimi, Mehdi; Rajion, Mohamed Ali; Meng, Goh Yong; Ahmad, Hafandi	International Journal of Molecular Sciences
Propranolol selectively blocks the enhanced parietal old/new effect during long-term recollection of unpleasant pictures: A high density ERP study	Evidence from both animal and human research suggests that the formation of emotional memories is triggered by the beta-adrenergic system. To confirm whether modulation of central beta-adrenergic transmission is specifically involved in the neural signature of memory performance, the pre-encoding effect of propranolol (80 mg) on event-related potentials (ERPs) was measured in a placebo-controlled…	2010	2010-02-01	Weymar, Mathias; Löw, Andreas; Modess, Christiane; Engel, Georg; Gründling, Matthias; Petersmann, Astrid; Siegmund, Werner; Hamm, Alfons O	NeuroImage
The independent contribution of executive functions to health related quality of life in older women	BACKGROUND: Cognition is a multidimensional construct and to our knowledge, no previous studies have examined the independent contribution of specific domains of cognition to health related quality of life. To determine whether executive functions are independently associated with health related quality of life assessed using Quality Adjusted Life Years (QALYs) calculated from the EuroQol EQ-5D (…	2010	2010-04-01	Davis, Jennifer C.; Marra, Carlo A.; Najafzadeh, Mehdi; Liu-Ambrose, Teresa	BMC geriatrics
Changes in executive functions and self-efficacy are independently associated with improved usual gait speed in older women	BACKGROUND: Improved usual gait speed predicts substantial reduction in mortality. A better understanding of the modifiable factors that are independently associated with improved gait speed would ensure that intervention strategies are developed based on a valid theoretical framework. Thus, we examined the independent association of change in executive functions and change in falls-related self-…	2010	2010-05-19	Liu-Ambrose, Teresa; Davis, Jennifer C.; Nagamatsu, Lindsay S.; Hsu, Chun Liang; Katarynych, Lindsay A.; Khan, Karim M.	BMC geriatrics
Brain activity in goal-directed movements in a real compared to a virtual environment using the Nintendo Wii	Low budget virtual environments like the Nintendo Wii increased in popularity and may play a role in motor learning related to sports and exercise. But nothing was known about the comparability of cortical activity of motor tasks in real and virtual environments. The aim of the study was to examine cortical differences between real and Wii based virtual sports performances using the golf putt as …	2010	2010-08-30	Baumeister, Jochen; Reinecke, Kirsten; Cordes, Marjolijn; Lerch, Christiane; Weiss, Michael	Neuroscience Letters
Impact of mindfulness-based stress reduction training on intrinsic brain connectivity	The beneficial effects of mindful awareness and mindfulness meditation training on physical and psychological health are thought to be mediated in part through changes in underlying brain processes. Functional connectivity MRI (fcMRI) allows identification of functional networks in the brain. It has been used to examine state-dependent activity and is well suited for studying states such as medit…	2011	2011-05-01	Kilpatrick, Lisa A; Suyenobu, Brandall Y; Smith, Suzanne R; Bueller, Joshua A; Goodman, Trudy; Creswell, J David; Tillisch, Kirsten; Mayer, Emeran A; Naliboff, Bruce D	NeuroImage
Beyond acute social stress: Increased functional connectivity between amygdala and cortical midline structures	Whereas we know a fair amount on the role of the amygdala in the acute stress response, virtually nothing is known about its role during the recovery period after the stress has waned. Functional connectivity analysis of the amygdala during this period might be useful in revealing brain circuits promoting adaptive recovery from a stressful event, as well as consolidation of emotionally relevant i…	2011	2011-08-15	Veer, Ilya M; Oei, Nicole YL; Spinhoven, Philip; van Buchem, Mark A; Elzinga, Bernet M; Rombouts, Serge ARB	NeuroImage
Increased risk of cognitive and functional decline in patients with atrial fibrillation: results of the ONTARGET and TRANSCEND studies	The role of atrial fibrillation in cognitive impairment and dementia, independent of stroke, is uncertain. We sought to determine the association of atrial fibrillation with cognitive and physical impairment in a large group of patients at high cardiovascular risk. We conducted a post-hoc analysis of two randomized controlled trials involving 31,546 patients, the aims of which were to evaluate th…	2012	2012-04-03	Marzona, Irene, MSc, PharmD; O'Donnell, Martin, MB, PhD; Teo, Koon, MB, PhD; Gao, Peggy, MSc; Anderson, Craig, MD, PhD; Bosch, Jackie, BScOT MSc; Yusuf, Salim, MD, DPhil	Canadian Medical Association. Journal
Effects of walnut consumption on cognitive performance in young adults	Walnuts contain a number of potentially neuroprotective compounds like vitamin E, folate, melatonin, several antioxidative polyphenols and significant amounts of n-3 [alpha]-linolenic fatty acid. The present study sought to determine the effect of walnuts on verbal and non-verbal reasoning, memory and mood. A total of sixty-four college students were randomly assigned to two treatment sequences i…	2012	2012-05-14	Pribis, Peter; Bailey, Rudolph N; Russell, Andrew A; Kilsby, Marcia A; Hernandez, Magaly; Craig, Winston J; Grajales, Tevni; Shavlik, David J; Sabatè, Joan	The British Journal of Nutrition
Evaluation of a Combined Treatment Paradigm Consisting of Environmental Enrichment and the 5-HT1A Receptor Agonist Buspirone after Experimental Traumatic Brain Injury	Environmental enrichment (EE) and serotonin[sub]1A (5-HT[sub]1A)-receptor agonists provide significant benefit after experimental traumatic brain injury (TBI). The aim of this study was to test the hypothesis that combining these therapies would produce an effect that is more robust than either therapy alone. Anesthetized adult male rats received a cortical impact or sham injury and then were ran…	2012	2012-07-01	Kline, Anthony E; Olsen, Adam S; Sozda, Christopher N; Hoffman, Ann N; Cheng, Jeffrey P	Journal of Neurotrauma
Traumatic Brain Injury-Induced Cognitive and Histological Deficits Are Attenuated by Delayed and Chronic Treatment with the 5-HT1A-Receptor Agonist Buspirone	The aim of this study was to evaluate the potential efficacy of the serotonin[sub]1A (5-HT[sub]1A) receptor agonist buspirone (BUS) on behavioral and histological outcome after traumatic brain injury (TBI). Ninety-six isoflurane-anesthetized adult male rats were randomized to receive either a controlled cortical impact or sham injury, and then assigned to six TBI and six sham groups receiving one…	2012	2012-07-01	Olsen, Adam S; Sozda, Christopher N; Cheng, Jeffrey P; Hoffman, Ann N; Kline, Anthony E	Journal of Neurotrauma
Efficacy of walking exercise in promoting cognitive-psychosocial functions in men with prostate cancer receiving androgen deprivation therapy	BACKGROUND: Prostate cancer is the most commonly diagnosed non-melanoma cancer among men. Androgen deprivation therapy (ADT) has been the core therapy for men with advanced prostate cancer. It is only in recent years that clinicians began to recognize the cognitive-psychosocial side effects from ADT, which significantly compromise the quality of life of prostate cancer survivors. The objectives o…	2012	2012-07-30	Lee, C. Ellen; Kilgour, Andrea; Lau, Y. K. James	BMC cancer
A Relatively Brief Exposure to Environmental Enrichment after Experimental Traumatic Brain Injury Confers Long-Term Cognitive Benefits	It is well established that a relatively brief exposure to environmental enrichment (EE) enhances motor and cognitive performance after experimental traumatic brain injury (TBI), but it is not known whether the benefits can be sustained after EE is discontinued. To address this important rehabilitation-relevant concern, anesthetized rats received a controlled cortical impact (CCI) or sham injury,…	2012	2012-11-20	Cheng, Jeffrey P; Shaw, Kaitlyn E; Monaco, Christina M; Hoffman, Ann N; Sozda, Christopher N; Olsen, Adam S; Kline, Anthony E	Journal of Neurotrauma
Donepezil Is Ineffective in Promoting Motor and Cognitive Benefits after Controlled Cortical Impact Injury in Male Rats	The acetylcholinesterase (AChE) inhibitor donepezil is used as a therapy for Alzheimer's disease and has been recommended as a treatment for enhancing attention and memory after traumatic brain injury (TBI). Although select clinical case studies support the use of donepezil for enhancing cognition, there is a paucity of experimental TBI studies assessing the potential efficacy of this pharmacothe…	2013	2013-04-01	Shaw, Kaitlyn E; Bondi, Corina O; Light, Samuel H; Massimino, Lire A; McAloon, Rose L; Monaco, Christina M; Kline, Anthony E	Journal of Neurotrauma
Treatment of Mild Traumatic Brain Injury with an Erythropoietin-Mimetic Peptide	Mild traumatic brain injury (mTBI) results in an estimated 75-90% of the 1.7 million TBI-related emergency room visits each year. Post-concussion symptoms, which can include impaired memory problems, may persist for prolonged periods of time in a fraction of these cases. The purpose of this study was to determine if an erythropoietin-mimetic peptide, pyroglutamate helix B surface peptide (pHBSP),…	2013	2013-05-01	Robertson, Claudia S; Garcia, Robert; Gaddam, Samson Sujit Kumar; Grill, Raymond J; Cerami Hand, Carla; Tian, Tian Siva; Hannay, H Julia	Journal of Neurotrauma
The effect of beverages varying in glycaemic load on postprandial glucose responses, appetite and cognition in 10-12-year-old school children	Reducing glycaemic index (GI) and glycaemic load (GL) inconsistently improves aspects of cognitive function and appetite in children. Whether altering the GL by lowering carbohydrate relative to protein and fat has a role in these effects is unknown. Therefore, we assessed the differential effects of beverages varying in GL and dairy composition on appetite, energy intake and cognitive function i…	2013	2013-08-14	Brindal, Emily; Baird, Danielle; Slater, Amy; Danthiir, Vanessa; Wilson, Carlene; Bowen, Jane; Noakes, Manny	The British Journal of Nutrition
Physical and Cognitive Performance of Patients with Acute Lung Injury 1 Year after Initial Trophic versus Full Enteral Feeding: EDEN Trial Follow-up	We hypothesized that providing patients with acute lung injury two different protein/calorie nutritional strategies in the intensive care unit may affect longer-term physical and cognitive performance. To assess physical and cognitive performance 6 and 12 months after acute lung injury, and to evaluate the effect of trophic versus full enteral feeding, provided for the first 6 days of mechanical …	2013	2013-09-01	Needham, Dale M; Dinglas, Victor D; Morris, Peter E; Jackson, James C; Hough, Catherine L; Mendez-Tellez, Pedro A; Wozniak, Amy W; Colantuoni, Elizabeth; Ely, E Wesley; Rice, Todd W; Hopkins, Ramona O	American Journal of Respiratory and Critical Care Medicine
Breakfast high in whey protein or carbohydrates improves coping with workload in healthy subjects	Dietary components may affect brain function and influence behaviour by inducing the synthesis of neurotransmitters. The aim of the present study was to examine the influence of consumption of a whey protein-containing breakfast drink v. a carbohydrate drink v. control on subjective and physiological responses to mental workload in simulated work. In a randomised cross-over design, ten healthy su…	2013	2013-11-14	Sihvola, Nora; Korpela, Riitta; Henelius, Andreas; Holm, Anu; Huotilainen, Minna; Müller, Kiti; Poussa, Tuija; Pettersson, Kati; Turpeinen, Anu; Peuhkuri, Katri	The British Journal of Nutrition
Response variability to glucose facilitation of cognitive enhancement	Glucose facilitation of cognitive function has been widely reported in previous studies (including our own). However, several studies have also failed to detect glucose facilitation. There is sparsity of research examining the factors that modify the effect of glucose on cognition. The aims of the present study were to (1) demonstrate the previously observed enhancement of cognition through gluco…	2013	2013-11-28	Owen, Lauren; Scholey, Andrew; Finnegan, Yvonne; Sünram-Lea, Sandra I	The British Journal of Nutrition
Limited Health Literacy and Decline in Executive Function in Older Adults	Limited health literacy is associated with worse executive function, but the association between limited health literacy and decline in executive function has not been established because of a lack of longitudinal studies. The authors aimed to examine this association by studying a prospective cohort in the setting of a randomized controlled trial to promote walking in older adults. Participants …	2013	2013-12-04	Sequeira, Shwetha S.; Eggermont, Laura H. P.; Silliman, Rebecca A.; Bickmore, Timothy W.; Henault, Lori E.; Winter, Michael R.; Nelson, Kerrie; Paasche-Orlow, Michael K.	Journal of Health Communication
Cognitive training with casual video games: Points to consider	Brain training programs have proliferated in recent years, with claims that video games or computer-based tasks can broadly enhance cognitive function. However, benefits are commonly seen only in trained tasks. Assessing generalized improvement and practicality of laboratory exercises complicates interpretation and application of findings. In this study, we addressed these issues by using active …	2014	2014-01-07	Baniqued, Pauline L.; Kranz, Michael B.; Voss, Michelle W.; Lee, Hyunkyu; Cosman, Joshua D.; Severson, Joan; Kramer, Arthur F.	Frontiers in Psychology
Neurocognitive enhancement in older adults: comparison of three cognitive training tasks to test a hypothesis of training transfer in brain connectivity	The ultimate goal of cognitive enhancement as an intervention for age-related cognitive decline is transfer to everyday cognitive functioning. Development of training methods that transfer broadly to untrained cognitive tasks (far transfer) requires understanding of the neural bases of training and far transfer effects. We used cognitive training to test the hypothesis that far transfer is associ…	2014	2014-01-15	Strenziok, Maren; Parasuraman, Raja; Clarke, Ellen; Cisler, Dean S.; Thompson, James C.; Greenwood, Pamela M.	NeuroImage
Improvements to executive function during exercise training predict maintenance of physical activity over the following year	Previous studies have shown that exercise training benefits cognitive, neural, and physical health markers in older adults. It is likely that these positive effects will diminish if participants return to sedentary lifestyles following training cessation. Theory posits that that the neurocognitive processes underlying self-regulation, namely executive function (EF), are important to maintaining p…	2014	2014-05-27	Best, John R.; Nagamatsu, Lindsay S.; Liu-Ambrose, Teresa	Frontiers in Human Neuroscience
MMP-9 Inhibitor SB-3CT Attenuates Behavioral Impairments and Hippocampal Loss after Traumatic Brain Injury in Rat	The aim of this study was to evaluate the potential efficacy of SB-3CT, a matrix metallopeptidase 9 inhibitor, on behavioral and histological outcomes after traumatic brain injury (TBI) in rats. Adult male Sprague-Dawley rats were randomly divided into three groups (n=15/group): TBI with SB-3CT treatment, TBI with saline, and sham injury. The TBI model was induced by a fluid percussion TBI device…	2014	2014-07-01	Jia, Feng; Yin, Yu Hua; Gao, Guo Yi; Wang, Yu; Cen, Lian; Jiang, Ji-yao	Journal of Neurotrauma
Effects of Hypothermia for Perinatal Asphyxia on Childhood Outcomes	Background In the Total Body Hypothermia for Neonatal Encephalopathy Trial (TOBY), newborns with asphyxial encephalopathy who received hypothermic therapy had improved neurologic outcomes at 18 months of age, but it is uncertain whether such therapy results in longer-term neurocognitive benefits. Methods We randomly assigned 325 newborns with asphyxial encephalopathy who were born at a gestationa…	2014	2014-07-10	Azzopardi, Denis; Strohm, Brenda; Marlow, Neil; Brocklehurst, Peter; Deierl, Aniko; Eddama, Oya; Goodwin, Julia; Halliday, Henry L; Juszczak, Edmund; Kapellou, Olga; Levene, Malcolm; Linsell, Louise; Omar, Omar; Thoresen, Marianne; Tusor, Nora; Whitelaw, Andrew; Edwards, A David	The New England Journal of Medicine
Regional gray matter volume increases following 7days of voluntary wheel running exercise: A longitudinal VBM study in rats	The effects of physical exercise on brain morphology in rodents have been well documented in histological studies. However, to further understandwhenandwheremorphological changes occur in the whole brain, a noninvasive neuroimaging method allowing an unbiased, comprehensive, and longitudinal investigation of brain morphology should be used. In this study, we investigated the effects of 7days of v…	2014	2014-09-01	Sumiyoshi, Akira; Taki, Yasuyuki; Nonaka, Hiroi; Takeuchi, Hikaru; Kawashima, Ryuta	NeuroImage
Intensive cognitive training in schizophrenia enhances working memory and associated prefrontal cortical efficiency in a manner that drives long-term functional gains	We investigated whether intensive computerized cognitive training in schizophrenia could improve working memory performance and increase signal efficiency of associated middle frontal gyri (MFG) circuits in a functionally meaningful manner. Thirty schizophrenia participants and 13 healthy comparison participants underwent fMRI scanning during a letterN-back working memory task. Schizophrenia part…	2014	2014-10-01	Subramaniam, Karuna; Luks, Tracy L; Garrett, Coleman; Chung, Cleo; Fisher, Melissa; Nagarajan, Srikantan; Vinogradov, Sophia	NeuroImage
Mindfulness training modulates value signals in ventromedial prefrontal cortex through input from insular cortex	Neuroimaging research has demonstrated that ventromedial prefrontal cortex (vmPFC) encodes value signals that can be modulated by top-down cognitive input such as semantic knowledge, price incentives, and monetary favors suggesting that such biases may have an identified biological basis. It has been hypothesized that mindfulness training (MT) provides one path for gaining control over such top-d…	2014	2014-10-15	Kirk, Ulrich; Gu, Xiaosi; Harvey, Ann H; Fonagy, Peter; Montague, P Read	NeuroImage
A Combined Therapeutic Regimen of Buspirone and Environmental Enrichment Is More Efficacious than Either Alone in Enhancing Spatial Learning in Brain-Injured Pediatric Rats	Buspirone, a 5-HT[sub]1A receptor agonist, and environmental enrichment (EE) enhance cognition and reduce histopathology after traumatic brain injury (TBI) in adult rats, but have not been fully evaluated after pediatric TBI, which is the leading cause of death in children. Hence, the aims of this study were to assess the efficacy of buspirone alone (Experiment 1) and in combination with EE (Expe…	2014	2014-12-01	Monaco, Christina M; Gebhardt, Kory M; Chlebowski, Sarah M; Shaw, Kaitlyn E; Cheng, Jeffrey P; Henchir, Jeremy J; Zupa, Margaret F; Kline, Anthony E	Journal of Neurotrauma
Vitamin A deficiency induces structural and functional alterations in the molecular constituents of the rat hippocampus	To date, no structural study has been carried out on the effects of vitamin A deficiency (VAD) on hippocampal macromolecules. Therefore, in the present study, the effect of dietary VAD on the structure, content and function of rat hippocampal molecules was investigated using Fourier transform IF spectroscopy. Male Wistar rats were randomly divided into three groups: an experimental group maintain…	2015	2015-01-14	Elibol-Can, Birsen; Simsek-Ozek, Nihal; Severcan, Feride; Severcan, Mete; Jakubowska-Dogru, Ewa	The British Journal of Nutrition
Divergent Long-Term Consequences of Chronic Treatment with Haloperidol, Risperidone, and Bromocriptine on Traumatic Brain Injury-Induced Cognitive Deficits	Antipsychotic drugs (APDs) are provided in the clinic to manage traumatic brain injury (TBI)-induced agitation and aggression. Experimental TBI studies consistently show that daily administration of the APDs, haloperidol (HAL) and risperidone (RISP), hinder recovery. However, it is unknown how long the adverse effects remain after cessation of treatment. To elucidate this clinically relevant issu…	2015	2015-04-15	Phelps, Thomas I; Bondi, Corina O; Ahmed, Rashid H; Olugbade, Yewande T; Kline, Anthony E	Journal of Neurotrauma
Cognitive and perceptual responses during passive heat stress in younger and older adults	We tested the hypothesis that attention, memory, and executive function are impaired to a greater extent in passively heat-stressed older adults than in passively heat-stressed younger adults. In a randomized, crossover design, 15 older (age: 69 +/- 5 yr) and 14 younger (age: 30 +/- 4 yr) healthy subjects underwent passive heat stress and time control trials. Cognitive tests (outcomes: accuracy a…	2015	2015-05-15	Schlader, Zachary J.; Gagnon, Daniel; Adams, Amy; Rivas, Eric; Cullum, C. Munro; Crandall, Craig G.	American Journal of Physiology-Regulatory Integrative and Comparative Physiology
Midlife plasma vitamin D concentrations and performance in different cognitive domains assessed 13 years later	25-Hydroxyvitamin D (25(OH)D) insufficiency is very common in many countries. Yet, the extent to which 25(OH)D status affects cognitive performance remains unclear. The objective of the present study was to evaluate the cross-time association between midlife plasma 25(OH)D concentrations and subsequent cognitive performance, using a subsample from the French 'SUpplémentation en Vitamines et Minér…	2015	2015-05-28	Assmann, Karen E; Touvier, Mathilde; Andreeva, Valentina A; Deschasaux, Mélanie; Constans, Thierry; Hercberg, Serge; Galan, Pilar; Kesse-Guyot, Emmanuelle	The British Journal of Nutrition
The Effect of Breakfast Prior to Morning Exercise on Cognitive Performance, Mood and Appetite Later in the Day in Habitually Active Women	Pre-exercise nutritional practices for active females exercising for mood, cognitive and appetite benefits are not well established. Results from an initial field pilot study showed that higher energy intake at breakfast was associated with lower fatigue and higher overall mood and alertness post-exercise (all p < 0.05). In a follow-up, randomised, controlled trial, 24 active women completed thre…	2015	2015-07-14	Veasey, Rachel C.; Haskell-Ramsay, Crystal F.; Kennedy, David O.; Tiplady, Brian; Stevenson, Emma J.	Nutrients
Embodied cognitive flexibility and neuroplasticity following Quadrato Motor Training	Quadrato Motor Training (QMT) is a whole-body movement contemplative practice aimed at increasing health and well-being. Previous research studying the effect of one QMT session suggested that one of its means for promoting health is by enhancing cognitive flexibility, an important dimension of creativity. Yet, little is known about the effect of a longer QMT practice on creativity, or the relati…	2015	2015-07-22	Ben-Soussan, Tal D.; Berkovich-Ohana, Aviva; Piervincenzi, Claudia; Glicksohn, Joseph; Carducci, Filippo	Frontiers in Psychology
Hydration Status of Air Force Military Basic Trainees After Implementation of the Back-Mounted Hydration System	The Air Force makes an extraordinary effort to prevent heat-related illnesses associated with basic military training (BMT) in south Texas. However, inadequate hydration can still contribute to lost training time and qualified trainees leaving military service without completing BMT. The purpose of the present study was to determine whether equipping BMTs with back-mounted hydration systems (BM) …	2009	2009-08	Fogt, Donovan L, PhD; Brosch, Lorie C, USAF MC; Dacey, Danny C, USAF BSC; Kalns, John E, PhD; Ketchum, Norma S, MS; Rohrbeck, Patricia, USAF BSC; Venuto, Margaret M, MA, MPH; Tchandja, Juste B, MPH; Bunning, Mike L, USAF BSC	Military Medicine
Alcohol-Influenced Nonverbal Behaviors During Discussions About a Relationship Problem	We examined the effect of alcohol intoxication on the display of nonverbal behaviors during discussions with dating partners about a relationship problem. Forty-four heterosexual dyads engaged in a 7-min conversation about a hypothetical infidelity. Males were randomly assigned to drinking condition (sober or .08 g/dl) and their behaviors were coded for behavioral expressivity, verbal expressivit…	2009	2009-09	Samp, Jennifer A; Monahan, Jennifer L	Journal of Nonverbal Behavior
TASK COMPLEXITY, FOCUS ON FORM, AND SECOND LANGUAGE DEVELOPMENT	Tasks have received increased attention in SLA research for the past decade, as has the role of focus on form. However, few empirical studies have investigated the relationship among tasks, focus-on-form techniques, and second language (L2) learning outcomes. To help address this gap, the present study examined how the task variable +/- contextual support combined with the focus-on-form technique…	2009	2009-09	Révész, Andrea	Studies in Second Language Acquisition
The Cognitive Cost of Anticholinergic Burden: Decreased Response to Cognitive Training in Schizophrenia	Schizophrenia is treated with medications that raise serum anticholinergic activity and are known to adversely affect cognition. The authors examined the relationship between serum anticholinergic activity and baseline cognitive performance and response to computerized cognitive training in outpatients with schizophrenia. Fifty-five patients were randomly assigned to either computerized cognitive…	2009	2009-09	Vinogradov, Sophia, MD; Fisher, Melissa, PhD; Warm, Heather, BA; Holland, Christine, BA; Kirshner, Margaret A, BA; Pollock, Bruce G, MD, PhD	The American Journal of Psychiatry
Soya isoflavone supplementation enhances spatial working memory in men	Females perform better in certain memory-related tasks than males. Sex differences in cognitive performance may be attributable to differences in circulating oestrogen acting on oestrogen beta receptors (ERbeta) which are prevalent in brain regions such as the hippocampus, frontal lobe and cortex that mediate cognitive functions. Since soya isoflavones are known to activate ERbeta, chronic isofla…	2009	2009-11	Thorp, Alicia A.; Sinn, Natalie; Buckley, Jonathan D.; Coates, Alison M.; Howe, Peter R. C.	The British Journal of Nutrition
Steroid hormones in the saliva of adolescents after different exercise intensities and their influence on working memory in a school setting	Little is known, about the influence of different exercise intensities on cognition, the concentration of steroid hormones (SHs), and their interaction in adolescents. Sixty high school students from the 9th grade were randomly assigned to two experimental (EG 1, EG 2) and a control group (CG). Saliva collection took place after a normal school lesson (t1) and after a 12-min resting control or ex…	2010	2010-04	Budde, Henning; Voelcker-Rehage, Claudia; Pietrassyk-Kendziorra, Sascha; Machado, Sergio; Ribeiro, Pedro; Arafat, Ayman M.	Psychoneuroendocrinology
Robot-assisted modifications of gait in healthy individuals	This study investigated whether short-term modifications of gait could be induced in healthy adults and whether a combination of kinetic (a compliant force resisting deviation of the foot from the prescribed footpath) and visual guidance was superior to either kinetic guidance or visual guidance alone in producing this modification. Thirty-nine healthy adults, 20-33 years old, were randomly assig…	2010	2010-05	Kim, Seok Hun; Banala, Sai K; Brackbill, Elizabeth A; Agrawal, Sunil K; Krishnamoorthy, Vijaya; Scholz, John P	Experimental Brain Research
Empirical Comparison of Typical and Atypical Environmental Enrichment Paradigms on Functional and Histological Outcome after Experimental Traumatic Brain Injury	Several studies have shown that housing rats in an enriched environment (EE) after traumatic brain injury (TBI) improves functional and histological outcome. The typical EE includes exploratory, sensory, and social components in cages that are often vastly larger than standard (STD) housing. It is uncertain, however, whether a single or specific component is sufficient to confer these benefits af…	2010	2010-06	Sozda, Christopher N; Hoffman, Ann N; Olsen, Adam S; Cheng, Jeffrey P; Zafonte, Ross D; Kline, Anthony E	Journal of Neurotrauma
EFFECTS OF FORM-FOCUSED PRACTICE AND FEEDBACK ON CHINESE EFL LEARNERS' ACQUISITION OF REGULAR AND IRREGULAR PAST TENSE FORMS	Conducted in English-as-a-foreign-language (EFL) classrooms at the university level in China, this quasi-experimental study compared the effects of three different corrective feedback treatments on 72 Chinese learners' use of regular and irregular English past tense. Three classes were randomly assigned to a prompt group, a recast group, or a control group and then participated in form-focused pr…	2010	2010-06	Yang, Yingli; Lyster, Roy	Studies in Second Language Acquisition
Effects of high-dose B vitamin complex with vitamin C and minerals on subjective mood and performance in healthy males	A significant proportion of the general population report supplementing their diet with one or more vitamins or minerals, with common reasons for doing so being to combat stress and fatigue and to improve mental functioning. Few studies have assessed the relationship between supplementation with vitamins/minerals and psychological functioning in healthy cohorts of non-elderly adults. The present …	2010	2010-07	Kennedy, David O; Veasey, Rachel; Watson, Anthony; Dodd, Fiona; Jones, Emma; Maggini, Silvia; Haskell, Crystal F	Psychopharmacology
High-intensity stress elicits robust cortisol increases, and impairs working memory and visuo-spatial declarative memory in Special Forces candidates: A field experiment	While running a selection procedure, 27 male Belgian Special Forces candidates, with a mean age of 27.4 years (SD = 5.1), were randomly assigned to a no-stress control (n = 14) or a high-intensity stress group (n = 13). Participants in the latter group were exposed to an extremely strenuous mock prisoner of war (POW) exercise. Immediately after stress or control treatment, working memory and visu…	2010	2010-07	Taverniers, John; Van Ruysseveldt, Joris; Smeets, Tom; von Grumbkow, Jasper	Stress (Amsterdam, Netherlands)
Increased heart rate variability and executive performance after aerobic training in the elderly	This study examined the effects of two short physical training programs on various parameters of heart rate variability (HRV) and on executive performance in older people. Twenty-four sedentary men and women aged 65-78 years were randomly assigned to an aerobic exercise program or a stretching program three times a week for 12 weeks. Resting HRV was measured in time and frequency domains in each …	2010	2010-07	Albinet, Cédric T; Boucard, Geoffroy; Bouquet, Cédric A; Audiffren, Michel	European Journal of Applied Physiology
The acute effects of glucose ingestion on attentional control in fasting healthy older adults	Glucose enhancing effects have been observed in older adults mainly for episodic memory, but have been under-investigated for attentional functions, which are very sensitive to aging. The present study examined the acute effects of glucose ingestion on different attentional tasks in fasting healthy older adults. In a between-subjects design, 44 participants (60 years and older) were randomly assi…	2010	2010-08	Gagnon, Christine; Greenwood, Carol E; Bherer, Louis	Psychopharmacology
Prefrontal Cortical Changes Following Cognitive Training in Patients with Chronic Schizophrenia: Effects of Practice, Generalization, and Specificity	Cognitive training is increasingly used in the treatment of schizophrenia, but it remains unknown how this training affects functional neuroanatomy. Practice on specific cognitive tasks generally leads to automaticity and decreased prefrontal cortical activity, yet broad-based cognitive training programs may avoid automaticity and increase prefrontal cortex (PFC) activity. This study used quasi-r…	2010	2010-08	Haut, Kristen M; Lim, Kelvin O; Macdonald, Angus, Iii	Neuropsychopharmacology
COHERENCE TRAINING IN CHILDREN WITH ATTENTION-DEFICIT HYPERACTIVITY DISORDER: COGNITIVE FUNCTIONS AND BEHAVIORAL CHANGES	Attention-deficit hyperactivity disorder (ADHD) is the most prevalent behavioral diagnosis in children, with an estimated 500 000 children affected in the United Kingdom alone. The need for an appropriate and effective intervention for children with ADHD is a growing concern for educators and childcare agencies. This randomized controlled clinical trial evaluated the impact of the HeartMath self-…	2010	2010-08	Lloyd, Anthony, PhD; Brett, David, BSc; Wesnes, Keith, PhD	Alternative Therapies in Health and Medicine
Testing Tic Suppression: Comparing the Effects of Dexmethylphenidate to No Medication in Children and Adolescents with Attention-Deficit/Hyperactivity Disorder and Tourette's Disorder	Objective: The aim of this study was to conduct a pilot study testing whether single-dose, immediate-release dexmethylphenidate (dMPH) can facilitate tic suppression in children and adolescents with attention-deficit/hyperactivity disorder (ADHD) and Tourette's disorder (TD) or chronic tic disorders. The primary hypothesis is that dMPH will improve behaviorally reinforced tic suppression in a sta…	2010	2010-08	Lyon, Gholson J; Samar, Stephanie M; Conelea, Christine; Trujillo, Marcel R; Lipinski, Christina M; Bauer, Christopher C; Brandt, Bryan C; Kemp, Joshua J; Lawrence, Zoe E; Howard, Jonathan; Castellanos, F Xavier; Woods, Douglas; Coffey, Barbara J	Journal of Child and Adolescent Psychopharmacology
Effect of Growth Hormone Replacement Therapy on Cognition after Traumatic Brain Injury	Traumatic brain injury (TBI) is a major public health issue, and yet medical science has little to offer for the persistent symptoms that prevent many of these individuals from fully re-entering society. Post-traumatic hypopituitarism, and specifically growth hormone deficiency (GHD), has been found in a large percentage of individuals with chronic moderate to severe TBI. Presently, there are no …	2010	2010-09	High Jr, Walter M; Briones-Galang, Maria; Clark, Jessica A; Gilkison, Charles; Mossberg, Kurt A; Zgaljardic, Dennis J; Masel, Brent E; Urban, Randall J	Journal of Neurotrauma
Effects of Guanfacine Extended Release on Oppositional Symptoms in Children Aged 6-12 Years with Attention-Deficit Hyperactivity Disorder and Oppositional Symptoms	Objective: To evaluate the efficacy and safety of guanfacine extended release (XR, Intuniv(TM); Shire Development Inc., Wayne, PA, USA) in the treatment of oppositional symptoms in children aged 6-12 years with a diagnosis of attention-deficit hyperactivity disorder (ADHD) and the presence of oppositional symptoms. Subjects and Methods: In this randomized, double-blind, placebo-controlled, multic…	2010	2010-09	Connor, Daniel F; Findling, Robert L; Kollins, Scott H; Sallee, Floyd; López, Frank A; Lyne, Andrew; Tremblay, Gerald	CNS Drugs
Glucocorticoid use in acute lymphoblastic leukaemia	Glucocorticoids (prednisone and dexamethasone) play an essential part in the treatment of acute lymphoblastic leukaemia (ALL), but their optimum doses and bioequivalence have not been established. Results of preclinical studies have shown that dexamethasone has a longer half-life and better CNS penetration than does prednisone. In prospective randomised trials, dexamethasone improved control of C…	2010	2010-11	Inaba, Hiroto; Pui, Ching-Hon	Lancet Oncology
Evaluation of a Combined Therapeutic Regimen of 8-OH-DPAT and Environmental Enrichment after Experimental Traumatic Brain Injury	When provided individually, both the serotonin (5-HT[sub]1A)-receptor agonist 8-hydroxy-2-(di-n-propylamino)tetralin (8-OH-DPAT) and environmental enrichment (EE) enhance behavioral outcome and reduce histopathology after experimental traumatic brain injury (TBI). The aim of this study was to determine whether combining these therapies would yield greater benefit than either used alone. Anestheti…	2010	2010-11	Kline, Anthony E; McAloon, Rose L; Henderson, Kate A; Bansal, Utsav K; Ganti, Bhaskar M; Ahmed, Rashid H; Gibbs, Robert B; Sozda, Christopher N	Journal of Neurotrauma
Acupressure as a Non-Pharmacological Intervention for Traumatic Brain Injury (TBI)	Acupressure is a complementary and alternative medicine (CAM) treatment using fingertips to stimulate acupoints on the skin. Although suggested to improve cognitive function, acupressure has not been previously investigated with a controlled design in traumatic brain injury (TBI) survivors, who could particularly benefit from a non-pharmacological intervention for cognitive impairment. A randomiz…	2011	2011-01	McFadden, Kristina L; Healy, Kyle M; Dettmann, Miranda L; Kaye, Jesse T; Ito, Tiffany A; Hernández, Theresa D	Journal of Neurotrauma
The effects on cognitive functions of a movement-based intervention in patients with Alzheimer's type dementia: a pilot study	OBJECTIVE: To explore the effect of a non-aerobic movement based activity on cognition in people with Alzheimer's type dementia (AD). METHODS: The sample consisted of 27 patients fulfilling the AD ICD-10 diagnostic criteria. The patient sample was randomly divided into two groups: The Exercise Group received 6 weeks movement training and comprised 15 participants with a mean age of 70.5 years (SD…	2011	2011-02	Yágüez, Lidia; Shaw, Kendra N.; Morris, Robin; Matthews, David	International Journal of Geriatric Psychiatry
The Effects of Prior Cognitive Control Task Exposure on Responses to Emotional Tasks in Healthy Participants	Background: Recent advances have been made in the application of cognitive training strategies as interventions for mental disorders. One novel approach, cognitive control training (CCT), uses computer-based exercises to chronically increase prefrontal cortex recruitment. Activation of prefrontal control mechanisms have specifically been identified with attenuation of emotional responses. However…	2011	2011-03	Calkins, Amanda W; Deveney, Christen M; Weitzman, Meara L; Hearon, Bridget A; Siegle, Greg J; Otto, Michael W	Behavioural and Cognitive Psychotherapy
Neurocognitive prediction of illness knowledge after psychoeducation in schizophrenia: results from the Munich COGPIP study	Background: Many patients with schizophrenia exhibit neurocognitive impairments, namely, in attentional, mnestic and executive functions. While these deficits limit psychosocial rehabilitation, their effect on psychoeducation is unknown. Within the framework of the longitudinal Munich Cognitive Determinants of Psychoeducation and Information in Schizophrenic Psychoses (COGPIP) study, we examined:…	2011	2011-03	Jahn, T; Pitschel-Walz, G; Gsottschneider, A; Froböse, T; Kraemer, S; Bäuml, J	Psychological Medicine
Effect of virtual reality on time perception in patients receiving chemotherapy	Virtual reality (VR) during chemotherapy has resulted in an elapsed time compression effect, validating the attention diversion capabilities of VR. Using the framework of the pacemaker-accumulator cognitive model of time perception, this study explored the influence of age, gender, state anxiety, fatigue, and cancer diagnosis in predicting the difference between actual time elapsed during receipt…	2011	2011-04	Schneider, Susan M; Kisby, Cassandra K; Flint, Elizabeth P	Supportive Care in Cancer
Academic, Behavioral, and Cognitive Effects of OROS? Methylphenidate on Older Children with Attention-Deficit/Hyperactivity Disorder	Objective: To assess the effect of Osmotic-Release Oral System (OROS) methylphenidate (MPH) on a variety of measures evaluating academic performance, cognition, and social behavior in children with attention-deficit/hyperactivity disorder (ADHD). Methods: This double-blind, randomized, placebo-controlled, crossover laboratory school study enrolled 78 children aged 9-12 years with ADHD who respond…	2011	2011-04	Wigal, Sharon B; Wigal, Tim; Schuck, Sabrina; Brams, Matthew; Williamson, David; Armstrong, Robert B; Starr, H Lynn	Journal of Child and Adolescent Psychopharmacology
Improving cognition by adherence to physical or mental exercise: a moderated mediation analysis	BACKGROUND: The role of adherence to an intervention is examined to further understand the relationship between performing new challenging activities (either mental or physical ones) and their putative cognitive benefits. METHOD: Healthy older women (N = 229, age range: 70-93 years) took part in a six-month randomised controlled trial, covering either a physical or mental activity (three × weekly…	2011	2011-05	Evers, Andrea; Klusmann, Verena; Schwarzer, Ralf; Heuser, Isabella	Aging & Mental Health
Effectiveness of Occupational Goal Intervention for Clients With Schizophrenia	The effectiveness of Occupational Goal Intervention (OGI) in clients with schizophrenia was compared with that of the Frontal Executive Program and a control group. We used a quasi-experimental design with 18 adult participants ages 20-38 who were randomly assigned to three groups. Testing was performed before treatment, after treatment, and at 6-mo follow-up (Time 2). Instruments assessed execut…	2011	2011-06	Katz, Noomi; Keren, Navah	The American Journal of Occupational Therapy
Fish Oil Supplementation During Lactation: Effects on Cognition and Behavior at 7 Years of Age	Early accumulation of n-3 long-chain PUFA (LCPUFA) in the brain may contribute to differences in later cognitive abilities. In this study, our objective was to examine whether fish oil (FO) supplementation during lactation affects processing speed, working memory, inhibitory control, and socioemotional development at 7 years. Danish mothers (n = 122) were randomized to FO [1.5 g/d n-3 LCPUFA] or …	2011	2011-07	Cheatham, Carol L; Nerhammer, Anne Sofie; Asserhøj, Marie; Michaelsen, Kim F; Lauritzen, Lotte	Lipids
A description of a cognitive rehabilitation programme evaluated in brain tumour patients with mild to moderate cognitive deficits	This series of articles for rehabilitation in practice aims to cover a knowledge element of the rehabilitation medicine curriculum. Nevertheless they are intended to be of interest to a multidisciplinary audience. The competency addressed in this article is cognitive rehabilitation. Background: There is a paucity of literature on the rationale, design, and content of successful cognitive rehabili…	2011	2011-08	Gehring, K; Aaronson, NK; Taphoorn, MJB; Sitskoorn, MM	Clinical Rehabilitation
The relation between time spent on the written recall task and the memory of L2 text	The free recall task has gained popularity among researchers in the field of second language reading research recently. Because of its prevalent use in L2 reading research, increased attention is being given to an examination of the use of the recall task as a measure of L2 reading comprehension. An examination of the existing literature revealed that studies employing the recall task to measure …	2011	2011-09	Chang, Yuh-fang	Reading and Writing
The effects of an afterschool physical activity program on working memory in preadolescent children	The present study examined the effects of a 9-month randomized control physical activity intervention aimed at improving cardiorespiratory fitness on changes in working memory performance in preadolescent children relative to a waitlist control group. Participants performed a modified Sternberg task, which manipulated working memory demands based on encoding set sizes, while task performance and …	2011	2011-09	Kamijo, Keita; Pontifex, Matthew B.; O'Leary, Kevin C.; Scudder, Mark R.; Wu, Chien-Ting; Castelli, Darla M.; Hillman, Charles H.	Developmental Science
Nurse-Enhanced Memory Intervention in Heart Failure: the MEMOIR study	BACKGROUND: Many patients with heart failure (HF) have cognitive deficits, including memory loss. OBJECTIVES: The aim of this study was to evaluate the efficacy of a cognitive training intervention on memory (primary outcome), working memory, psychomotor speed, executive function, and performance of cognitive activities and instrumental activities of daily living (IADLs). METHODS AND RESULTS: For…	2011	2011-10	Pressler, Susan J.; Therrien, Barbara; Riley, Penny L.; Chou, Cheng-Chen; Ronis, David L.; Koelling, Todd M.; Smith, Dean G.; Sullivan, Barbara Jean; Frankini, Ann-Marie; Giordani, Bruno	Journal of Cardiac Failure
Mechanism of functional recovery after repetitive transcranial magnetic stimulation (rTMS) in the subacute cerebral ischemic rat model: neural plasticity or anti-apoptosis?	Repetitive transcranial magnetic stimulation (rTMS) has been studied increasingly in recent years to determine whether it has a therapeutic benefit on recovery after stroke. However, the underlying mechanisms of rTMS in stroke recovery remain unclear. Here, we evaluated the effect of rTMS on functional recovery and its underlying mechanism by assessing proteins associated with neural plasticity a…	2011	2011-10	Yoon, Kyung Jae; Lee, Yong-taek; Han, Tai Ryoon	Experimental Brain Research
A Field Experiment Examining the Effects of Accounting Equation Emphasis and Transaction Scope on Students Learning to Journalize	Financial accounting textbooks introduce the journalizing process in varying ways. Some texts emphasize the accounting equation, others do not. Some begin with a restricted set of transactions affecting only balance sheet accounts, whereas others begin with an expanded set of transactions affecting both balance sheet and income statement accounts. Based on Scaffolding Theory, we examine the poten…	2011	2011-11	Phillips, Fred; Heiser, Lindsay	Issues in Accounting Education
Mild dehydration impairs cognitive performance and mood of men	The present study assessed the effects of mild dehydration on cognitive performance and mood of young males. A total of twenty-six men (age 20·0 (sd 0·3) years) participated in three randomised, single-blind, repeated-measures trials: exercise-induced dehydration plus a diuretic (DD; 40 mg furosemide); exercise-induced dehydration plus placebo containing no diuretic (DN); exercise while maintaini…	2011	2011-11	Ganio, Matthew S.; Armstrong, Lawrence E.; Casa, Douglas J.; McDermott, Brendon P.; Lee, Elaine C.; Yamamoto, Linda M.; Marzano, Stefania; Lopez, Rebecca M.; Jimenez, Liliana; Le Bellego, Laurent; Chevillotte, Emmanuel; Lieberman, Harris R.	The British Journal of Nutrition
Effects of Acute Exercise on Long-Term Memory	In this study, we tested the effect of acute exercise on long-term memory, specifically the timing of exercise relative to the memory challenge. We assessed memory via paragraph recall, in which participants listened to two paragraphs (exposure) and recounted them following a 35-min delay. Participants (n = 48) were randomly assigned to one of three groups: exercise prior to exposure, exercise af…	2011	2011-12	Labban, Jeffrey D; Etnier, Jennifer L	Research Quarterly for Exercise and Sport
Effects of Acute Exercise on Executive Function: A Study With a Tower of London Task	The purpose of this study is to extend the literature by examining the effects of an acute bout of moderate to vigorous intensity aerobic exercise on the executive functions of planning and problem solving assessed using a Tower of London Task (TOL Task). Forty-two participants were randomly assigned into either exercise or control group, and performed the TOL Task, before and immediately followi…	2011	2011-12	Chang, Yu-Kai; Tsai, Chia-Liang; Hung, Tsung-Min; So, Edmund Cheung; Chen, Feng-Tzu; Etnier, Jennifer L.	Journal of Sport & Exercise Psychology
Promoting vocabulary, phonological awareness and concept about print among children at risk for learning disability: can e-books help?	The purpose of the present study was to investigate the effect of activity with an educational electronic book (e-book), as compared with adult reading of the printed version of the same book, on the vocabulary, phonological awareness as well as concept about print of preschool children at risk for learning disabilities. The study involved the participation of 110 children aged 5-7. All participa…	2012	2012-01	Shamir, Adina; Korat, Ofra; Fellah, Renat	Reading and Writing
Impact of Structure of Early Practice on Student Performance in Transaction Analysis	In introductory accounting textbooks, virtually all end-of-chapter problems on transaction analysis follow the same familiar format: a collection of transactions performed by a given business during a specified time period. Modern research-based models of human cognitive architecture suggest, however, that this format is suboptimal for beginning students. An approach better aligned with this lear…	2012	2012-02	Johnson, Benny G; Slayter, Erik	Issues in Accounting Education
The Effect of Sleep Deprivation on Choice Reaction Time and Anaerobic Power of College Student Athletes	Purpose: The aim of this study was to determine the effect of one night's sleep deprivation on anaerobic performance and reaction time of subjects in the morning of the following day. Methods: Eighteen male college student athletes were studied twice in a balanced, randomized design. Subjects were measured for peak power, mean power and reaction time. Results: The performance showed no significan…	2012	2012-03	Taheri, Morteza; Arabameri, Elaheh	Asian Journal of Sports Medicine
Dissociation of Motor Task-Induced Cortical Excitability and Pain Perception Changes in Healthy Volunteers	Background There is evidence that interventions aiming at modulation of the motor cortex activity lead to pain reduction. In order to understand further the role of the motor cortex on pain modulation, we aimed to compare the behavioral (pressure pain threshold) and neurophysiological effects (transcranial magnetic stimulation (TMS) induced cortical excitability) across three different motor task…	2012	2012-03	Volz, Magdalena S; Mendonca, Mariana; Pinheiro, Fernando S; Cui, Huashun; Santana, Marcus; Fregni, Felipe	PLoS One
Heart Rate Variability and Exercise in Aging Women	Background: Our group has shown a positive dose-response in maximal cardiorespiratory exercise capacity (VO2max) and heart rate variability (HRV) to 6months of exercise training but no improvement in VO2max for women >= 60 years. Here, we examine the HRVresponse to exercise training in postmenopausal women younger and older than 60 years. Methods: We examined 365 sedentary, overweight, hypertensi…	2012	2012-03	Earnest, Conrad P.; Blair, Steven N.; Church, Timothy S.	Journal of Womens Health
The Effects of Two Types of Sleep Deprivation on Visual Working Memory Capacity and Filtering Efficiency	Sleep deprivation has adverse consequences for a variety of cognitive functions. The exact effects of sleep deprivation, though, are dependent upon the cognitive process examined. Within working memory, for example, some component processes are more vulnerable to sleep deprivation than others. Additionally, the differential impacts on cognition of different types of sleep deprivation have not bee…	2012	2012-04	Drummond, Sean PA; Anderson, Dane E; Straus, Laura D; Vogel, Edward K; Perez, Veronica B	PLoS One
Online discussion compensates for suboptimal timing of supportive information presentation in a digitally supported learning environment	This study used a sequential set-up to investigate the consecutive effects of timing of supportive information presentation (information before vs. information during the learning task clusters) in interactive digital learning materials (IDLMs) and type of collaboration (personal discussion vs. online discussion) in computer-supported collaborative learning (CSCL) on student knowledge constructio…	2012	2012-04	Noroozi, Omid; Busstra, Maria C; Mulder, Martin; Biemans, Harm J; A; Tobi, Hilde; Geelen, Anouk; Van't Veer, Pieter; Chizari, Mohammad	Educational Technology, Research and Development
The influence of exercise-induced fatigue on cognitive function	Although anecdotal reports suggest that information processing and decision making is impaired immediately following prolonged periods of physical activity, results obtained from laboratory studies of exercise-induced fatigue have been inconsistent. Fatigue effects may be task specific and related to the time of post-exercise testing. The present study examined the effects on adults’ performance …	2012	2012-05	Moore, Robert D.; Romine, Mathew W.; O'Connor, Patrick J.; Tomporowski, Phillip D.	Journal of Sports Sciences
Walk on the Bright Side: Physical Activity and Affect in Major Depressive Disorder	Although prescribed exercise has been found to improve affect and reduce levels of depression, we do not know how self-initiated everyday physical activity influences levels of positive affect (PA) and negative affect (NA) in depressed persons. Fifty-three individuals diagnosed with Major Depressive Disorder (MDD) and 53 never-depressed controls participated in a seven-day experience sampling stu…	2012	2012-05	Mata, Jutta; Thompson, Renee J.; Jaeggi, Susanne M.; Buschkuehl, Martin; Jonides, John; Gotlib, Ian H.	Journal of Abnormal Psychology
"Mind the Trap": Mindfulness Practice Reduces Cognitive Rigidity	Two experiments examined the relation between mindfulness practice and cognitive rigidity by using a variation of the Einstellung water jar task. Participants were required to use three hypothetical jars to obtain a specific amount of water. Initial problems were solvable by the same complex formula, but in later problems ("critical" or "trap" problems) solving was possible by an additional much …	2012	2012-05	Greenberg, Jonathan; Reiner, Keren; Meiran, Nachshon	PLoS One
Testing the Structured Free Recall Intervention for Reducing the Impact of Bodyweight-Based Stereotypes on Performance Ratings in Immediate and Delayed Contexts	This article investigates the efficacy of the Structured Free Recall Intervention (SFRI; J Bus Psychol 15:229-246, 2000a; Organ Behav Hum Decis Process 82:237-267, 2000b ) for reducing the impact of bodyweight-based stereotype endorsement on performance ratings, both immediately and when a time delay occurs between the observation and rating of performance. 512 undergraduates participated in a 2 …	2012	2012-06	Rudolph, Cort W; Baltes, Boris B; Zhdanova, Ludmila S; Clark, Malissa A; Bal, Anne C	Journal of Business and Psychology
Will Working Memory Training Generalize to Improve Off-Task Behavior in Children with Attention-Deficit/Hyperactivity Disorder?	Issue Title: New Directions for Therapeutics in ADHD Computerized working memory and executive function training programs designed to target specific impairments in executive functioning are becoming increasingly available, yet how well these programs generalize to improve functional deficits in disorders, such as attention-deficit/hyperactivity disorder (ADHD), beyond the training context is not…	2012	2012-07	Green, Chloe T; Long, Debra L; Green, David; Iosif, Ana-maria; Dixon, J Faye; Miller, Meghan R; Fassbender, Catherine; Schweitzer, Julie B	Neurotherapeutics
Combined Cognitive Remediation and Functional Skills Training for Schizophrenia: Effects on Cognition, Functional Competence, and Real-World Behavior	Objective: Cognitive remediation is an efficacious treatment for schizophrenia and, when used within broader psychosocial treatments, improves transfer to real-world behavior change. The authors examined whether cognitive remediation effectively generalizes to functional competence and real-world functioning as a standalone treatment and when combined with a functional skills treatment. Method: O…	2012	2012-07	Bowie, Christopher R, PhD; McGurk, Susan R, PhD; Mausbach, Brent, PhD; Patterson, Thomas L, PhD; Harvey, Philip D, PhD	The American Journal of Psychiatry
Factors Associated with Sustained Attention during an Activity Intervention in Persons with Dementia	Background/Aims: Are the noncognitive factors of self-reported mood and personality related to sustained attention in nursing home residents with dementia during an activity intervention? Methods: Intervention data from a randomized clinical trial were used to address the aim of this project. Subjects were 128 nursing home residents who were assessed for mood, personality, behavioral indicators o…	2012	2012-07	Kolanowski, Ann; Bossen, Ann; Hill, Nikki; Guzman-velez, Edmarie; Litaker, Mark	Dementia and Geriatric Cognitive Disorders
MDMA (ecstasy) effects on actual driving performance before and after sleep deprivation, as function of dose and concentration in blood and oral fluid	Experimental research has shown that 3,4-methylenedioxymethamphetamine (MDMA) can improve some psychomotor driving skills when administered during the day. In real life, however, MDMA is taken during the night, and driving may likely occur early in the morning after a night of "raving" and sleep loss. The present study assessed the effects of MDMA on road-tracking and car-following performance in…	2012	2012-08	Bosker, Wendy M; Kuypers, Kim P; C; Conen, Silke; Kauert, Gerold F; Toennes, Stefan W; Skopp, Gisela; Ramaekers, Johannes G	Psychopharmacology
Dairy consumption and working memory performance in overweight and obese adults	All individuals will experience some degree of cognitive impairment in their later years. Diet is one readily modifiable factor that may influence cognitive function and psychological well-being. Very little research has considered the potential role of dairy foods in modulating cognitive and psychological functions. The objective of this study was to determine the effect of a high intake of redu…	2012	2012-08	Crichton, Georgina E; Murphy, Karen J; Howe, Peter RC; Buckley, Jonathan D; Bryan, Janet	Appetite
Effects of Acute Physical Exercise on Executive Functions: A Comparison Between Aerobic and Strength Exercise	The aim of this study was to compare the effects of acute aerobic and strength exercises on selected executive functions. A counterbalanced, crossover, randomized trial was performed. Forty-two healthy women were randomly submitted to three different conditions: (1) aerobic exercise, (2) strength exercise, and (3) control condition. Before and after each condition, executive functions were measur…	2012	2012-08	Rodrigues Alves, Christiano Robles; Gualano, Bruno; Takao, Pollyana Pereira; Avakian, Paula; Fernandes, Rafael Mistura; Morine, Diego; Takito, Monica Yuri	Journal of Sport & Exercise Psychology
A Single Bout of Exercise Improves Motor Memory	Regular physical activity has a positive impact on cognition and brain function. Here we investigated if a single bout of exercise can improve motor memory and motor skill learning. We also explored if the timing of the exercise bout in relation to the timing of practice has any impact on the acquisition and retention of a motor skill. Forty-eight young subjects were randomly allocated into three…	2012	2012-09	Roig, Marc; Skriver, Kasper; Lundbye-Jensen, Jesper; Kiens, Bente; Nielsen, Jens Bo	PLoS One
Effects of augmented proprioceptive cues on the parameters of gait of individuals with Parkinson's disease	Context : Impairment of initiating sequential movements and processing of proprioception contribute to characteristic Parkinson's disease (PD) gait abnormalities. Many studies have used a single external cue or 2 different cues to correct PD gait. Aim: An aim of this study was to determine the influence of paired proprioceptive cues on gait parameters of individuals with PD. Setting and Design: D…	2012	2012-10	El-Tamawy, Mohamed; Darwish, Moshera; Khallaf, Mohamed	Annals of Indian Academy of Neurology
Ingesting breakfast meals of different glycaemic load does not alter cognition and satiety in children	Background/Objectives: The effect of Glycemic Index (GI) and Load (GL) of breakfasts on satiety and aspects of cognitive function in children is inconclusive. We aimed to assess if isocaloric breakfasts differing in GL (by replacing high-GI carbohydrate foods with dairy protein foods) acutely alter cognitive function and satiety in 10- to 12-year-old children. Subjects/Methods: A total of 39 chil…	2012	2012-10	Brindal, E; Baird, D; Danthiir, V; Wilson, C; Bowen, J; Slater, A; Noakes, M	European Journal of Clinical Nutrition
Effects of Growth Hormone-Releasing Hormone on Cognitive Function in Adults With Mild Cognitive Impairment and Healthy Older Adults Results of a Controlled Trial	Background: Growth hormone-releasing hormone (GHRH), growth hormone, and insulin-like growth factor 1 have potent effects on brain function, their levels decrease with advancing age, and they likely play a role in the pathogenesis of Alzheimer disease. Previously, we reported favorable cognitive effects of short-term GHRH administration in healthy older adults and provided preliminary evidence to…	2012	2012-11	Baker, Laura D.; Barsness, Suzanne M.; Borson, Soo; Merriam, George R.; Friedman, Seth D.; Craft, Suzanne; Vitiello, Michael V.	Archives of Neurology
Long-term functional outcome in adult prison inmates with ADHD receiving OROS-methylphenidate	In a recent randomized, double-blind, placebo-controlled trial, we established a robust efficacy (Cohen's d = 2.17) of osmotic release oral system-methylphenidate (OROS-methylphenidate) delivered 72 mg daily for 5 weeks versus placebo on attention deficit hyperactivity disorder (ADHD) symptoms, global severity and global functioning in 30 adult male prison inmates with ADHD and coexisting disorde…	2012	2012-12	Ginsberg, Ylva; Hirvikoski, Tatja; Grann, Martin; Lindefors, Nils	European Archives of Psychiatry and Clinical Neuroscience
TASK COMPLEXITY, LEARNING OPPORTUNITIES, AND KOREAN EFL LEARNERS' QUESTION DEVELOPMENT	Building on the cognitive and interactive perspectives of task research, the cognition hypothesis states that increasing task complexity promotes greater interaction and feedback and thus facilitates second language (L2) development (Robinson, 2001b, 2007a). To date, very little research has explored this claim during learner-learner interactions in English as a foreign language (EFL) classroom c…	2012	2012-12	Kim, YouJin	Studies in Second Language Acquisition
The effects of a mid-morning bout of exercise on adolescents' cognitive function	The aim of the present study was to examine the effects of a mid-morning bout of exercise on adolescents’ cognitive function in a randomised crossover design where each participant completed two experimental trials. Forty-five adolescents (13.3 ± 0.3 years old), undertook a bout of exercise (ten repeats of level one of the multi-stage fitness test, 30 s rest between repeats; exercise trial) or co…	2012	2012-12	Cooper, Simon B.; Bandelow, Stephan; Nute, Maria L.; Morris, John G.; Nevill, Mary E.	Mental Health and Physical Activity
A Platform for the Remote Conduct of Gene-Environment Interaction Studies	Background Gene-environment interaction studies offer the prospect of robust causal inference through both gene identification and instrumental variable approaches. As such they are a major and much needed development. However, conducting these studies using traditional methods, which require direct participant contact, is resource intensive. The ability to conduct gene-environment interaction st…	2013	2013-01	Gallacher, John; Collins, Rory; Elliott, Paul; Palmer, Stephen; Burton, Paul; Mitchell, Clive; John, Gareth; Lyons, Ronan	PLoS One
Into the Square and out of the Box: The effects of Quadrato Motor Training on Creativity and Alpha Coherence	The objective of the present study was to investigate the body-cognitive relationship through behavioral and electrophysiological measures in an attempt to uncover the underlying mediating neuronal mechanism for movement-induced cognitive change. To this end we examined the effects of Quadrato Motor Training (QMT), a new whole-body training paradigm on cognitive performance, including creativity …	2013	2013-01	Ben-Soussan, Tal Dotan; Glicksohn, Joseph; Goldstein, Abraham; Berkovich-Ohana, Aviva; Donchin, Opher	PLoS One
Feasibility, Safety, and Efficacy of the Combination of D-Serine and Computerized Cognitive Retraining in Schizophrenia: An International Collaborative Pilot Study	The combination of pharmacotherapy and cognitive retraining (CRT) for the cognitive deficits of schizophrenia may be more efficacious than either approach alone, but this has not yet been tested. This study evaluated the feasibility, safety, tolerability, and efficacy of 12 weeks of D-serine, combined with CRT in the treatment of cognitive deficits in schizophrenia at two academic sites in parall…	2013	2013-02	D'souza, Deepak C; Radhakrishnan, Rajiv; Perry, Edward; Bhakta, Savita; Singh, Nagendra M; Yadav, Richa; Abi-saab, Danielle; Pittman, Brian; Chaturvedi, Santosh K; Sharma, Mahendra P; Bell, Morris; Andrade, Chittaranjan	Neuropsychopharmacology
The Combined Propranolol/TSST Paradigm - A New Method for Psychoneuroendocrinology	Upon perception of a stimulus as stressful, the human brain reacts with the activation of the hypothalamus-pituitary-adrenal (HPA) axis and the sympathetic nervous system (SNS), to mobilize energy resources to better cope with the stressor. Since the perception of the stressor is the initial stimulus, a synchronicity between the subjective perception of stress and the physiological stress reactiv…	2013	2013-02	Andrews, Julie; Pruessner, Jens C	PLoS One
INtensive versus Standard Ambulatory Blood Pressure Lowering to Prevent Functional DeclINe In The ElderlY (INFINITY)	Reductions in mobility and cognitive function linked to accrual of brain microvascular disease related white matter hyperintensities (WMHs) on magnetic resonance imaging can occur in older hypertensive patients in as little as 2 years. We have designed a trial evaluating 2 levels of ambulatory blood pressure (ABP) control in individuals with normal or mildly impaired mobility and cognition who ha…	2013	2013-03	White, William B; Marfatia, Ravi; Schmidt, Julia; Wakefield, Dorothy B; Kaplan, Richard F; Bohannon, Richard W; Hall, Charles B; Guttmann, Charles R; Moscufo, Nicola; Fellows, Douglas; Wolfson, Leslie	The American Heart Journal
The Effect of Synchronized Forced Running with Chronic Stress on Short, Mid and Long- term Memory in Rats	Purpose: Impairment of learning and memory processes has been demonstrated by many studies using different stressors. Other reports suggested that exercise has a powerful behavioral intervention to improve cognitive function and brain health. In this research, we investigated protective effects of treadmill running on chronic stress-induced memory deficit in rats. Methods: Fifty male Wistar rats …	2013	2013-03	Radahmadi, Maryam; Alaei, Hojjatallah; Sharifi, Mohammad Reza; Hosseini, Nasrin	Asian Journal of Sports Medicine
Cognitive Training Improves Sleep Quality and Cognitive Function among Older Adults with Insomnia	Study Objectives To investigate the effect of an eight-week, home-based, personalized, computerized cognitive training program on sleep quality and cognitive performance among older adults with insomnia. Design Participants (n = 51) were randomly allocated to a cognitive training group (n = 34) or to an active control group (n = 17). The participants in the cognitive training group completed an e…	2013	2013-04	Haimov, Iris; Shatil, Evelyn	PLoS One
Translating basic behavioral and social science research to clinical application: The EVOLVE mixed methods approach	[Correction Notice: An Erratum for this article was reported in Vol 81(2) of Journal of Consulting and Clinical Psychology (see record [rid]2012-29655-001[/rid]). In the article a citation and reference were mistakenly omitted. Under the heading 'Case Study: TBSRC,' subheading 'Positive affect,' the first sentence should have read: 'Positive affect (PA) is a mild feeling state induced by small ev…	2013	2013-04	Peterson, Janey C.; Czajkowski, Susan; Charlson, Mary E.; Link, Alissa R.; Wells, Martin T.; Isen, Alice M.; Mancuso, Carol A.; Allegrante, John P.; Boutin-Foster, Carla; Ogedegbe, Gbenga; Jobe, Jared B.	Journal of Consulting and Clinical Psychology
Mechanisms of insight in schizophrenia and impact of cognitive remediation therapy	The origins of poor insight in schizophrenia are still unclear. We contrasted the changes in clinical insight, basic cognitive processes, autobiographical memory and metacognition in 63 outpatients with schizophrenia pseudo-randomly assigned to one of three cognitive remediation groups: one targeting basic cognitive processes (RECOS), a second autobiographical memory (REMAu), and a third metacogn…	2013	2013-05	Lalova, Maria; Baylé, Franck; Grillon, Marie-Laure; Houet, Laëtitia; Moreau, Elodie; Rouam, Francis; Cacot, Pascal; Piolino, Pascale	Comprehensive Psychiatry
Treatment fidelity and acceptability of a cognition-focused intervention for older adults with mild cognitive impairment (MCI)	ABSTRACT Background: Acceptability and fidelity assessments are an integral part of research, although few published trials comment on these processes in detail. Methods: We designed a randomized controlled trial (RCT) to identify the benefits of a cognition-focused intervention for older adults with mild cognitive impairment. Participants completed a six-item feedback questionnaire identifying l…	2013	2013-05	Vidovich, Mandy R; Lautenschlager, Nicola T; Flicker, Leon; Clare, Linda; Almeida, Osvaldo P	International Psychogeriatrics
Effects of Stereotype Threat, Perceived Discrimination, and Examiner Race on Neuropsychological Performance: Simple as Black and White?	Abstract The purpose of the current study was to examine the predictive roles of stereotype threat and perceived discrimination and the mediating role of examiner-examinee racial discordance on neuropsychological performance in a non-clinical sample of African American and Caucasian individuals. Ninety-two African American (n = 45) and Caucasian (n = 47) adults were randomly assigned to either a …	2013	2013-05	Thames, April D; Hinkin, Charles H; Byrd, Desiree A; Bilder, Robert M; Duff, Kimberley J; Mindt, Monica Rivera; Arentoft, Alyssa; Streiff, Vanessa	Journal of the International Neuropsychological Society : JINS
An Economic Evaluation of Resistance Training and Aerobic Training versus Balance and Toning Exercises in Older Adults with Mild Cognitive Impairment	Background Mild cognitive impairment (MCI) represents a critical window to intervene against dementia. Exercise training is a promising intervention strategy, but the efficiency (i.e., relationship of costs and consequences) of such types of training remains unknown. Thus, we estimated the incremental cost-effectiveness of resistance training or aerobic training compared with balance and tone exe…	2013	2013-05	Davis, Jennifer C; Bryan, Stirling; Marra, Carlo A; Sharma, Devika; Chan, Alison; Beattie, B Lynn; Graf, Peter; Liu-Ambrose, Teresa	PLoS One
Efficacy of a cognitive intervention program in patients with mild cognitive impairment	ABSTRACT Background: Mild cognitive impairment (MCI) is a transitional state between normal aging and dementia. Identifying this condition would allow early interventions that may reduce the rate of progression to Alzheimer's disease (AD). We examined the efficacy of a six-month cognitive intervention program (CIP) in patients with MCI and to assess patients' condition at one-year follow-up. Meth…	2013	2013-05	Rojas, Galeno J; Villar, Veronica; Iturry, Monica; Harris, Paula; Serrano, Cecilia M; Herrera, Jorge A; Allegri, Ricardo F	International Psychogeriatrics
Testing the Boundaries of Computerized Cognitive Control Training on Symptoms of Obsessive Compulsive Disorder	Cognitive control training (CCT) uses computer-based exercises to increase prefrontal cortex activation. Recent studies have found that depressed participants who received CCT significantly reduce their negative affect and rumination, and improve focus and concentration (Siegle et al. in Cogn Ther Res 31:235-262, 2007 ; Calkins et al. 2011 ). These promising findings raise questions about the deg…	2013	2013-06	Calkins, Amanda W; Otto, Michael W	Cognitive Therapy and Research
Exercise holds immediate benefits for affect and cognition in younger and older adults	Physical activity is associated with improved affective experience and enhanced cognitive processing. Potential age differences in the degree of benefit, however, are poorly understood because most studies examine either younger or older adults. The present study examined age differences in cognitive performance and affective experience immediately following a single bout of moderate exercise. Pa…	2013	2013-06	Hogan, Candice L.; Mata, Jutta; Carstensen, Laura L.	Psychology and Aging
Acute oral administration of a tyrosine and phenylalanine-free amino acid mixture reduces exercise capacity in the heat	(ProQuest: ... denotes formulae and/or non-USASCII text omitted; see image) Acute tyrosine administration is associated with increased exercise capacity in the heat. To explore whether reduced plasma tyrosine and phenylalanine (tyrosine precursor) is associated with impaired exercise capacity in the heat, eight healthy, moderately trained male volunteers, unacclimated to exercise in the heat, per…	2013	2013-06	Tumilty, Les; Davison, Glen; Beckmann, Manfred; Thatcher, Rhys	European Journal of Applied Physiology
Mindfulness-Based Stress Reduction for Older Adults: Effects on Executive Function, Frontal Alpha Asymmetry and Immune Function	Background/Aims: Mindfulness-based stress reduction (MBSR) has enhanced cognition, positive emotion, and immunity in younger and middle-aged samples; its benefits are less well known for older persons. Here we report on a randomized controlled trial of MBSR for older adults and its effects on executive function, left frontal asymmetry of the EEG alpha band, and antibody response. Methods: Older a…	2013	2013-07	Moynihan, Jan A; Chapman, Benjamin P; Klorman, Rafael; Krasner, Michael S; Duberstein, Paul R; Brown, Kirk Warren; Talbot, Nancy L	Neuropsychobiology
Effects of Hydration on Cognitive Function of Pilots	The objective of this study was to examine the effect of fluid intake and possible dehydration on cognitive flight performance of pilots. A repeated-measures, counterbalanced, mixed study design was used to examine differences in working memory, spatial orientation, and cognitive flight performance of 40 randomly selected healthy pilots after having high and low fluid intakes. Serial weights were…	2013	2013-07	Lindseth, Paul D, USAF; Lindseth, Glenda N, PhD, RN, LRD; Petros, Thomas V, PhD; Jensen, Warren C, MD, MS; Caspers, Julie, PhD (C)	Military Medicine
Executive Function During Acute Exercise: The Role of Exercise Intensity	This study was designed to examine the modulation of executive functions during acute exercise and to determine whether exercise intensity moderates this relationship. Eighty college-aged adults were recruited and randomly assigned into one of the four following groups: control, 30%, 50%, and 80% heart rate reserve. The Wisconsin Card Sorting Test (WCST) was administered during each intervention.…	2013	2013-08	Wang, Chun-Chih; Chu, Chien-Heng; Chu, I.-Hua; Chan, Kuei-Hui; Chang, Yu-Kai	Journal of Sport & Exercise Psychology
Enzogenol for cognitive functioning in traumatic brain injury: A pilot placebo‐controlled RCT	Background and purpose: Enzogenol, a flavonoid-rich extract from Pinus radiata bark with antioxidant and anti-inflammatory properties has been shown to improve working memory in healthy adults. In traumatic brain injury (TBI), oxidation and inflammation have been linked to poorer cognitive outcomes. Hence, this phase II, randomized controlled trial investigated safety, compliance and efficacy of …	2013	2013-08	Theadom, A.; Mahon, S.; Barker‐Collo, S.; McPherson, K.; Rush, E.; Vandal, A. C.; Feigin, V. L.	European Journal of Neurology
Modulating Human Procedural Learning by Cerebellar Transcranial Direct Current Stimulation	Neuroimaging studies suggest that the cerebellum contributes to human cognitive processing, particularly procedural learning. This type of learning is often described as implicit learning and involves automatic, associative, and unintentional learning processes. Our aim was to investigate whether cerebellar transcranial direct current stimulation (tDCS) influences procedural learning as measured …	2013	2013-08	Ferrucci, Roberta; Brunoni, Andre R; Parazzini, Marta; Vergari, Maurizio; Rossi, Elena; Fumagalli, Manuela; Mameli, Francesca; Rosa, Manuela; Giannicola, Gaia; Zago, Stefano; Priori, Alberto	The Cerebellum
A multistate model of cognitive dynamics in relation to resistance training: the contribution of baseline function	PURPOSE: We investigated: (1) the effect of different targeted exercise training on an individual's overall probability for cognitive improvement, maintenance, or decline; and (2) the simultaneous effect of targeted exercise training and baseline function on the dynamics of executive functions when a multistate transition model is used. METHODS: Analyses are based on a 12-month randomized clinica…	2013	2013-08	Fallah, Nader; Hsu, Chun L.; Bolandzadeh, Niousha; Davis, Jennifer; Beattie, B. Lynn; Graf, Peter; Liu-Ambrose, Teresa	Annals of Epidemiology
The immediate and sustained effects of acute exercise on planning aspect of executive function	Objective: The purpose of this study was to clarify the immediate and sustained effects of an acute bout of exercise on the planning aspects of executive function. Design: This study used a 2 x 4 true experimental design. Method: Forty participants were randomly assigned to either the exercise or control groups and completed the Tower of London task prior to, immediately following, 30 min after, …	2013	2013-09	Hung, Tsung-Min; Tsai, Chia-Liang; Chen, Feng-Tzu; Wang, Chun-Chih; Chang, Yu-Kai	Psychology of Sport and Exercise
Grammar for writing? An investigation of the effects of contextualised grammar teaching on students' writing	The role of grammar instruction in the teaching of writing is contested in most Anglophone countries, with several robust meta-analyses finding no evidence of any beneficial effect. However, existing research is limited in that it only considers isolated grammar instruction and offers no theorisation of an instructional relationship between grammar and writing. This study, drawing on a theorised …	2013	2013-09	Jones, Susan; Myhill, Debra; Bailey, Trevor	Reading and Writing
A computer-based spatial learning strategy approach that improves reading comprehension and writing	This article explores the effectiveness of a computer-based spatial learning strategy approach for improving reading comprehension and writing. In reading comprehension, students received scaffolded practice in translating passages into graphic organizers. In writing, students received scaffolded practice in planning to write by filling in graphic organizers and in translating them into passages.…	2013	2013-10	Ponce, Hector R; Mayer, Richard E; Lopez, Mario J	Educational Technology, Research and Development
A Profile for Predicting Attrition from Exercise in Older Adults	The purpose of this study was to determine a profile for predicting attrition among older adults involved in a 12-month exercise program. The parent study was a single-blinded randomized controlled trial. The study took place between 2006 and 2009 within a university setting. Older adults (N=179) completed baseline assessments of functional performance and psychosocial measures. Participants who …	2013	2013-10	Mullen, Sean P; Wójcicki, Thomas R; Mailey, Emily L; Szabo, Amanda N; Gothe, Neha P; Olson, Erin A; Fanning, Jason; Kramer, Arthur; Mcauley, Edward	Prevention Science
A Comparison of Blue Light and Caffeine Effects on Cognitive Function and Alertness in Humans	The alerting effects of both caffeine and short wavelength (blue) light have been consistently reported. The ability of blue light to enhance alertness and cognitive function via non-image forming neuropathways have been suggested as a non-pharmacological countermeasure for drowsiness across a range of occupational settings. Here we compare and contrast the alerting and psychomotor effects of 240…	2013	2013-10	Beaven, C Martyn; Ekström, Johan	PLoS One
A single intraperitoneal injection of ketamine does not affect spatial working, reference memory or neurodegeneration in adult mice: An animal study	BACKGROUND: Ketamine is an anaesthetic and analgesic drug used in research and clinical practice. Little is known about the effects of different doses of this drug on memory and brain cellular death. OBJECTIVE: To study the effects of different doses of ketamine on working and reference memory, and neurodegeneration in adult mice. DESIGN: A randomised study. SETTINGS: The study was carried out in…	2013	2013-10	Ribeiro, Patrícia O.; Rodrigues, Paula C.; Valentim, Ana M.; Antunes, Luís M.	European Journal of Anaesthesiology
Neural Mechanism of Facilitation System during Physical Fatigue	An enhanced facilitation system caused by motivational input plays an important role in supporting performance during physical fatigue. We tried to clarify the neural mechanisms of the facilitation system during physical fatigue using magnetoencephalography (MEG) and a classical conditioning technique. Twelve right-handed volunteers participated in this study. Participants underwent MEG recording…	2013	2013-11	Tanaka, Masaaki; Ishii, Akira; Watanabe, Yasuyoshi	PLoS One
The efficacy of a multifactorial memory training in older adults living in residential care settings	ABSTRACT Background: Several studies have shown an increase in memory performance after teaching mnemonic techniques to older participants. However, transfer effects to non-trained tasks are generally either very small, or not found. Methods: The present study investigates the efficacy of a multifactorial memory training program for older adults living in a residential care center. The program co…	2013	2013-11	Vranic, Andrea; Spanic, Ana Marija; Carretti, Barbara; Borella, Erika	International Psychogeriatrics
APOE [epsilon]4, an Alzheimer's disease susceptibility allele, and smoking cessation	Possessing an apolipoprotein E (APOE) 4 allele, advanced age and smoking are risk factors for Alzheimer's disease and cognitive decline. Deficits in cognitive function also increase risk for smoking relapse. Data from 917 adult smokers of European ancestry were pooled across three randomized trials of smoking cessation. We examined whether smokers who carry at least one 4 allele (n=252) have more…	2013	2013-12	Ashare, R L; Karlawish, J H; Wileyto, E P; Pinto, A; Lerman, C	The Pharmacogenomics Journal
Inhibition of Propofol Anesthesia on Functional Connectivity between LFPs in PFC during Rat Working Memory Task	Working memory (WM) refers to the temporary storage and manipulation of information necessary for performance of complex cognitive tasks. There is a growing interest in whether and how propofol anesthesia inhibits WM function. The aim of this study is to investigate the possible inhibition mechanism of propofol anesthesia based on the functional connections of multi-local field potentials (LFPs) …	2013	2013-12	Xu, Xinyu; Tian, Yu; Li, Shuangyan; Li, Yize; Wang, Guolin; Tian, Xin	PLoS One
Clinic-Based Versus Outsourced Implementation of a Diabetes Health Literacy Intervention	We compared two implementation approaches for a health literacy diabetes intervention designed for community health centers. A quasi-experimental, clinic-randomized evaluation was conducted at six community health centers from rural, suburban, and urban locations in Missouri between August 2008 and January 2010. In all, 486 adult patients with type 2 diabetes mellitus participated. Clinics were s…	2014	2014-01	Wolf, Michael S, PhD, MPH; Seligman, Hilary, MD, MPH; Davis, Terry C, PhD; Fleming, David A, MD; Curtis, Laura M, MS; Pandit, Anjali U, MPH; Parker, Ruth M, MD; Schillinger, Dean, MD; Dewalt, Darren A, MD, MPH	Journal of General Internal Medicine
Delayed Remote Ischemic Postconditioning Improves Long Term Sensory Motor Deficits in a Neonatal Hypoxic Ischemic Rat Model	Objective Remote Ischemic Postconditioning (RIPC) is a promising therapeutic intervention wherein a sub-lethal ischemic insult induced in one organ (limb) improves ischemia in an organ distant to it (brain). The main objective of this study was to investigate the long-term functional effects of delayed RIPC in a neonatal hypoxia-ischemia (HI) rat model. Method 10 day old rat pups were subjected t…	2014	2014-02	Perera, Pradilka NDrunalini; Hu, Qin; Tang, Junjia; Li, Li; Barnhart, Margaret; Doycheva, Desislava M; Zhang, John H; Tang, Jiping	PLoS One
Declining Cognition and Falls: Role of Risky Performance of Everyday Mobility Activities	Declining cognition is a risk factor for falls among older adults. The extent to which impaired judgment in performance of daily activities increases fall risk is unclear. The aim of this study was to determine whether engagement in mobility activities in a risky manner explains the association between declining cognition and rate of falls. This study was a secondary analysis of baseline and pros…	2014	2014-03	Fischer, Barbara L; Gleason, Carey E; Gangnon, Ronald E; Janczewski, Jodi; Shea, Terry; Mahoney, Jane E	Physical Therapy
The Link Between Responsive Classroom Training and Student-Teacher Relationship Quality in the Fifth Grade: A Study of Fidelity of Implementation	The Responsive Classroom (RC) approach is an instructional delivery and social- emotional learning intervention designed to provide teachers with skills needed to create caring, well-managed classroom environments that are conducive to learning. This study examines the extent to which RC training predicts close student-teacher relationships, as well as negative relationships. Sixty-three fifth-gr…	2014	2014-03	Baroody, Alison E; Rimm-Kaufman, Sara E; Larsen, Ross A; Curby, Timothy W	School Psychology Review
The ironic effects of weight stigma	America's war on obesity has intensified stigmatization of overweight and obese individuals. This experiment tested the prediction that exposure to weight-stigmatizing messages threatens the social identity of individuals who perceive themselves as overweight, depleting executive resources necessary for exercising self-control when presented with high calorie food. Women were randomly assigned to…	2014	2014-03	Major, Brenda; Hunger, Jeffrey M.; Bunyan, Debra P.; Miller, Carol T.	Journal of Experimental Social Psychology
Improved Frontoparietal White Matter Integrity in Overweight Children Is Associated with Attendance at an After-School Exercise Program	Aerobic fitness is associated with white matter integrity (WMI) in adults as measured by diffusion tensor imaging (DTI). This study examined the effect of an 8-month exercise intervention on WMI in children. Participants were 18 sedentary, overweight (BMI ≥85th percentile) 8- to 11-year-old children (94% Black), randomly assigned to either an aerobic exercise (n = 10) or sedentary attention contr…	2014	2014-03	Krafft, Cynthia E; Schaeffer, David J; Schwarz, Nicolette F; Chi, Lingxi; Weinberger, Abby L; Pierce, Jordan E; Rodrigue, Amanda L; Allison, Jerry D; Yanasak, Nathan E; Liu, Tianming; Davis, Catherine L; Mcdowell, Jennifer E	Developmental Neuroscience
The Effect of Acute Exercise and Psychosocial Stress on Fine Motor Skills and Testosterone Concentration in the Saliva of High School Students	Little is known about the influence of different stressors on fine motor skills, the concentration of testosterone (T), and their interaction in adolescents. Therefore, 62 high school students aged 14-15 years were randomly assigned to two experimental groups (exercise, psychosocial stress) and a control group. Exercise stress was induced at 65-75% of the maximum heart rate by running for 15 minu…	2014	2014-03	Wegner, Mirko; Koedijker, Johan M; Budde, Henning	PLoS One
The impact of protein supplementation on cognitive performance in frail elderly	Maintenance of cognitive abilities is important for elderly to stay independent. With the aging of the population, the call for modifiable factors is emerging. Dietary protein might improve cognitive performance; however, this has hardly been studied. Therefore, we studied the impact of 24-week dietary protein supplementation on cognitive performance in pre-frail and frail elderly people. Pre-fra…	2014	2014-04	van der Zwaluw, Nikita L; van de Rest, Ondine; Tieland, Michael; Adam, Jos J; Hiddink, Gert Jan; van Loon, Luc J; C; de Groot, Lisette C; P; G; M	European Journal of Nutrition
Acute Bouts of Assisted Cycling Improves Cognitive and Upper Extremity Movement Functions in Adolescents With Down Syndrome	The aim of this study was to examine the effectiveness of 2 modes of exercise on cognitive and upper extremity movement functioning in adolescents with Down syndrome (DS). Nine participants randomly completed 3 interventions over 3 consecutive weeks. The interventions were: (a) voluntary cycling (VC), in which participants cycled at their self-selected pedaling rate; (b) assisted cycling (AC), in…	2014	2014-04	Ringenbach, Shannon D R; Albert, Andrew R; Chen, Chih-Chia (JJ; Alberts, Jay L	Intellectual and Developmental Disabilities
Predictors for Improvement of Problem-Solving during Cognitive Remediation for Patients with Schizophrenia	Abstract Cognitive remediation is a promising pathway for ameliorating cognitive impairment of patients with schizophrenia. Here, we investigate predictors of improvement in problem-solving ability for two different types of cognitive remediation - specific problem-solving training and training of basic cognition. For this purpose we conducted a re-analysis of a randomized controlled trial compar…	2014	2014-04	Rodewald, Katlehn; Holt, Daniel V; Rentrop, Mirjam; Roesch-Ely, Daniela; Liebrenz, Michael; Funke, Joachim; Weisbrod, Matthias; Kaiser, Stefan	Journal of the International Neuropsychological Society : JINS
Effects of Omega-3 Fatty Acid Supplementation on Neurocognitive Functioning and Mood in Deployed U.S. Soldiers: A Pilot Study	Omega-3 fatty acids (FAs) may have neuroprotective properties for psychological health and cognition. The objective of this study was to evaluate the effectiveness of omega-3 FAs (eicosapentaenoic + docosahexaenoic; Harris-Schacky [HS]-Omega-3 Index) on neuropsychological functioning among U.S. Soldiers deployed to Iraq. This randomized, double-blind, placebo-controlled trial included Soldiers be…	2014	2014-04	Dretsch, Michael N, MS USA; Johnston, Daniel, MC USA; Bradley, Ryan S, LPN; MacRae, Holden, PhD; Deuster, Patricia A, PhD; Harris, William S, PhD	Military Medicine
An Exploration of Computer Game-Based Instruction in the "World History" Class in Secondary Education: A Comparative Study in China	So far, many studies on educational games have been carried out in America and Europe. Very few related empirical studies, however, have been conducted in China. This study, combining both quantitative with qualitative research methods, possibly compensated for this regret. The study compared data collected from two randomly selected classes (out of 13 classes) under computer game-based instructi…	2014	2014-05	Yu, Zhonggen; Yu, Wei Hua; Fan, Xiaohui; Wang, Xiao	PLoS One
The Effect of Future Time Perspective Manipulation on Affect and Attentional Bias	Socioemotional selectivity theory proposes that decreased future time perspective would lead to an emphasis on goals of well-being, with attentional preference for positive information. We developed a procedure to manipulate future time perspective, based on mental imagery, to experimentally investigate its effects on attention and affect. In experiment 1, we tested a new measure of future time p…	2014	2014-06	Demeyer, Ineke; De Raedt, Rudi	Cognitive Therapy and Research
Effect of Augmented Sensorimotor Input on Learning Verbal and Nonverbal Tasks Among Children with Autism Spectrum Disorders	Thirty-four children, with autism spectrum disorders, ages 4-14 years, were matched and randomly assigned to one of two conditions for learning a novel juice-making task and producing two novel words about the event. Seventeen sighted children were manually guided to perform the task and tactually prompted during imitated productions of novel words for the event. Their matched controls heard the …	2014	2014-06	Latham, Susan O; Stockman, Ida J	Journal of Autism and Developmental Disorders
Impacts of the Primary School Free Breakfast Initiative on socio-economic inequalities in breakfast consumption among 9-11-year-old schoolchildren in Wales	Abstract Objectives Universal interventions may widen or narrow inequalities if disproportionately effective among higher or lower socio-economic groups. The present paper examines impacts of the Primary School Free Breakfast Initiative in Wales on inequalities in children's dietary behaviours and cognitive functioning. Design Cluster-randomised controlled trial. Responses were linked to free sch…	2014	2014-06	Moore, Graham F; Murphy, Simon; Chaplin, Katherine; Lyons, Ronan A; Atkinson, Mark; Moore, Laurence	Public Health Nutrition
Effect of physical education programme on neuropsychological variables	The aim of this study was to investigate the effect of physical education programme on neuropsychological variables. Only one hundred college students (Boys) whose age range between 22 to 27 years were randomly assigned to training from Bped Colleges. Short Term Memory, Long Term Memory, Tactile Sense and Visual Perception were measured for this study. Short Term Memory Test and Long Term Memory …	2014	2014-06	Halder, Shantanu; Bandopadhyay, Kanchan	Indian Journal of Health and Wellbeing
Intraoperative Maintenance of Normoglycemia with Insulin and Glucose Preserves Verbal Learning after Cardiac Surgery	Objective The hyperglycemic response to surgery may be a risk factor for cognitive dysfunction. We hypothesize that strict maintenance of normoglycemia during cardiac surgery preserves postoperative cognitive function. Methods As part of a larger randomized, single-blind, interventional efficacy study on the effects of hyperinsulinemic glucose control in cardiac surgery (NCT00524472), consenting …	2014	2014-06	Schricker, Thomas; Sato, Hiroaki; Beaudry, Thomas; Codere, Takumi; Hatzakorzian, Roupen; Pruessner, Jens C	PLoS One
The Role of Self-Monitoring and Response Inhibition in Improving Sleep Behaviours	Young adults tend to have poor sleep, which may be a result of poor self-regulation. This study investigated whether manipulating two aspects of self-regulation: self-monitoring and response inhibition could improve sleep behaviours. University students (N=190) were randomly allocated to complete (1) a self-monitoring sleep diary and response inhibition training, (2) a sleep diary only, or (3) a …	2014	2014-06	Todd, Jemma; Mullan, Barbara	International Journal of Behavioral Medicine
Novel Television-Based Cognitive Training Improves Working Memory and Executive Function	The main study objective was to investigate the effect of interactive television-based cognitive training on cognitive performance of 119 healthy older adults, aged 60-87 years. Participants were randomly allocated to a cognitive training group or to an active control group in a single-blind controlled two-group design. Before and after training interactive television cognitive performance was as…	2014	2014-07	Shatil, Evelyn; Mikulecká, Jaroslava; Bellotti, Francesco; Bures, Vladimír	PLoS One
Effect of a Virtual Environment on the Development of Mathematical Skills in Children with Dyscalculia	In this study, we show the effectiveness of a virtual environment comprising 18 computer games that cover mathematics topics in a playful setting and that can be executed on the Internet with the possibility of player interaction through chat. An arithmetic pre-test contained in the Scholastic Performance Test was administered to 300 children between 7 and 10 years old, including 162 males and 13…	2014	2014-07	Castro, Marcus Vasconcelosde; Bissaco, Márcia AparecidaSilva; Panccioni, Bruno Marques; Rodrigues, Silvia CristinaMartini; Domingues, Andreia Miranda	PLoS One
How Art Changes Your Brain: Differential Effects of Visual Art Production and Cognitive Art Evaluation on Functional Brain Connectivity	Visual art represents a powerful resource for mental and physical well-being. However, little is known about the underlying effects at a neural level. A critical question is whether visual art production and cognitive art evaluation may have different effects on the functional interplay of the brain's default mode network (DMN). We used fMRI to investigate the DMN of a non-clinical sample of 28 p…	2014	2014-07	Bolwerk, Anne; Mack-Andrick, Jessica; Lang, Frieder R; Dörfler, Arnd; Maihöfner, Christian	PLoS One
Attention modulates adaptive motor learning in the 'broken escalator' paradigm	The physical stumble caused by stepping onto a stationary (broken) escalator represents a locomotor aftereffect (LAE) that attests to a process of adaptive motor learning. Whether such learning is primarily explicit (requiring attention resources) or implicit (independent of attention) is unknown. To address this question, we diverted attention in the adaptation (MOVING) and aftereffect (AFTER) p…	2014	2014-07	Patel, Mitesh; Kaski, Diego; Bronstein, Adolfo M	Experimental Brain Research
Identifying training modalities to improve multitasking in older adults	Studies that have measured the effects of attentional training have relied on a range of training formats, which may vary in their efficacy. In particular, it is unclear whether programs that practice dual-tasking are more effective in improving divided attention than programs focusing on flexible allocation priority training. The aims of this study were as follows: (1) to compare the efficacy of…	2014	2014-08	Bier, Bianca; de Boysson, Chloé; Belleville, Sylvie	Age
Multiple sclerosis fatigue relief by bilateral somatosensory cortex neuromodulation	Multiple sclerosis-related fatigue is highly common and often refractory to medical therapy. Ten fatigued multiple sclerosis patients received two blocks of 5-day anodal bilateral primary somatosensory areas transcranial direct current stimulation in a randomized, double-blind sham-controlled, cross-over study. The real neuromodulation by a personalized electrode, shaped on the MR-derived primary…	2014	2014-08	Tecchio, Franca; Cancelli, Andrea; Cottone, Carlo; Zito, Giancarlo; Pasqualetti, Patrizio; Ghazaryan, Anna; Rossini, Paolo Maria; Filippi, Maria Maddalena	Journal of Neurology
Does working memory training promote the use of strategies on untrained working memory tasks?	Adaptive computerized training has been associated with significant enhancements in untrained working memory tasks, but the nature of the cognitive changes that underpin these improvements are not yet fully understood. Here, we investigate the possibility that training stimulates the use of memory-related strategies. In a randomized controlled trial, participants completed four tests of working m…	2014	2014-08	Dunning, Darren L; Holmes, Joni	Memory & Cognition
Executive control resources and snack food consumption in the presence of restraining versus facilitating cues	Prior studies have documented a negative relationship between strength of executive control resources (ECRs) and frequency of snack food consumption. However, little is known about what effect environmental cues (restraining versus facilitating) have on the engagement of such control resources. We presented 88 healthy adults with standardized tests of ECRs followed by a bogus taste test for three…	2014	2014-08	Hall, Peter A; Lowe, Cassandra; Vincent, Corita	Journal of Behavioral Medicine
Cognitive-emotional training as an intervention for major depressive disorder	BACKGROUND: There is an urgent need for more effective treatments for major depressive disorder (MDD). As understanding of the cognitive and affective neuroscience underlying psychiatric disorders expands, so do opportunities to develop interventions that capitalize on the capacity for brain plasticity. Cognitive training is one such strategy. In this article, we report a proof-of-concept study o…	2014	2014-08	Iacoviello, Brian M.; Wu, Gang; Alvarez, Evan; Huryk, Kathryn; Collins, Katherine A.; Murrough, James W.; Iosifescu, Dan V.; Charney, Dennis S.	Depression and Anxiety
Prospective Memory Performance of Patients with Parkinson's Disease Depends on Shifting Aptitude: Evidence from Cognitive Rehabilitation	Abstract This study investigated the effect of cognitive training aimed at improving shifting ability on Parkinson's disease (PD) patients' performance of prospective memory (PM) tasks. Using a double-blind protocol, 17 PD patients were randomly assigned to two experimental arms. In the first arm (n=9) shifting training was administered, and in the second (placebo) arm (n=8), language and respira…	2014	2014-08	Costa, Alberto; Peppe, Antonella; Serafini, Francesca; Zabberoni, Silvia; Barban, Francesco; Caltagirone, Carlo; Carlesimo, Giovanni Augusto	Journal of the International Neuropsychological Society : JINS
Oxytocin-Augmented Social Cognitive Skills Training in Schizophrenia	Impairments in social cognition are common in schizophrenia and predict poor functional outcome. The purpose of this proof-of-concept randomized, parallel group clinical trial was to assess whether intranasal oxytocin (OT), given before social cognitive training, enhances learning of social cognitive skills. Twenty seven male outpatients with schizophrenia participated in a 6-week (12 session) tr…	2014	2014-08	Davis, Michael C; Green, Michael F; Lee, Junghee; Horan, William P; Senturk, Damla; Clarke, Angelika D; Marder, Stephen R	Neuropsychopharmacology
Implementation Intentions for Physical Activity Behavior in Older Adult Women: An Examination of Executive Function as a Moderator of Treatment Effects	Implementation intentions are effective for enhancing physical activity, but it is unknown how well these effects extend to older adults and/or are modified by cognitive variables. Our objective is to examine (1) the efficacy of an implementation intentions intervention for physical activity in older adult women and (2) to examine the moderating effects of executive function. Participants (N=75, …	2014	2014-08	Hall, Peter A; Zehr, Christopher; Paulitzki, Jeffrey; Rhodes, Ryan	Annals of Behavioral Medicine
Effects of the Paraphrasing Strategy on Expository Reading Comprehension of Young Adults with Intellectual Disability	The purpose of the study was to investigate the effectiveness of teaching a three-step paraphrasing strategy on expository reading comprehension of young adults with intellectual disability. Ten learners from a postsecondary education program for individuals with disability participated in the study. They were randomly assigned to the control and experimental group before the study. An instructor…	2014	2014-09	Hua, Youjia; Woods-Groves, Suzanne; Ford, Jeremy W; Nobles, Kelly A	Education and Training in Autism and Developmental Disabilities
A short physical activity break from cognitive tasks increases selective attention in primary school children aged 10-11	Importance: Evidence for an acute effect of physical activity on cognitive performance within the school setting is limited. The purpose of this study was to gain insight into acute effects of a short physical activity bout on selective attention in primary school children, specifically in the school setting. Methods: Hundred and twenty three 10-11 years old children, 49.6% girls, engaged in four…	2014	2014-09	Janssen, M.; Chinapaw, M. J. M.; Rauh, S. P.; Toussaint, H. M.; van Mechelen, W.; Verhagen, E. a. L. M.	Mental Health and Physical Activity
The effects of an 8-week Hatha yoga intervention on executive function in older adults	BACKGROUND: Few scientific studies have examined movement-based embodied contemplative practices such as yoga and their effects on cognition. The purpose of this randomized controlled trial was to examine the effects of an 8-week Hatha yoga intervention on executive function measures of task switching and working memory capacity. METHODS: Community-dwelling older adults (N = 118; mean age = 62.0)…	2014	2014-09	Gothe, Neha P.; Kramer, Arthur F.; McAuley, Edward	The Journals of Gerontology. Series A, Biological Sciences and Medical Sciences
Effects of blue light and caffeine on mood	Both short wavelength (blue) light and caffeine have been studied for their mood enhancing effects on humans. The ability of blue light to increase alertness, mood and cognitive function via non-image forming neuropathways has been suggested as a non-pharmacological countermeasure for depression across a range of occupational settings. This experimental study compared blue light and caffeine and …	2014	2014-09	Ekström, Johan G; Beaven, C Martyn	Psychopharmacology
Failure to Replicate Depletion of Self-Control	The limited resource or strength model of self-control posits that the use of self-regulatory resources leads to depletion and poorer performance on subsequent self-control tasks. We conducted four studies (two with community samples, two with young adult samples) utilizing a frequently used depletion procedure (crossing out letters protocol) and the two most frequently used dependent measures of…	2014	2014-10	Xu, Xiaomeng; Demos, Kathryn E; Leahey, Tricia M; Hart, Chantelle N; Trautvetter, Jennifer; Coward, Pamela; Middleton, Kathryn R; Wing, Rena R	PLoS One
Preventing Risk for Significant Behavior Problems Through a Cognitive-Behavioral Intervention: Effects of the Tools for Getting Along Curriculum at One-Year Follow-Up	Efficient and effective social-emotional learning programs increase the likelihood of success in school for all students, and particularly for those who may develop emotional or behavior problems. In this study, we followed a sub-sample of students 1 year after their participation in a randomized controlled trial of the effects of the Tools for Getting Along (TFGA) curriculum. TFGA is a universal…	2014	2014-10	Smith, Stephen W; Daunic, Ann P; Barber, Brian R; Aydin, Burak; Van Loan, Christopher L; Taylor, Gregory G	Journal of Primary Prevention
Changing the Conversation: The Influence of Emotions on Conversational Valence and Alcohol Consumption	Health campaign effects may be improved by taking interpersonal communication processes into account. The current study, which employed an experimental, pretest-posttest, randomized exposure design (N=208), investigated whether the emotions induced by anti-alcohol messages influence conversational valence about alcohol and subsequent persuasion outcomes. The study produced three main findings. Fi…	2014	2014-10	Hendriks, Hanneke; van den Putte, Bas; de Bruijn, Gert-jan	Prevention Science
Virtual Reality Job Interview Training in Adults with Autism Spectrum Disorder	The feasibility and efficacy of virtual reality job interview training (VR-JIT) was assessed in a single-blinded randomized controlled trial. Adults with autism spectrum disorder were randomized to VR-JIT (n = 16) or treatment-as-usual (TAU) (n = 10) groups. VR-JIT consisted of simulated job interviews with a virtual character and didactic training. Participants attended 90 % of laboratory-based …	2014	2014-10	Smith, Matthew J; Ginger, Emily J; Wright, Katherine; Wright, Michael A; Taylor, Julie Lounds; Humm, Laura Boteler; Olsen, Dale E; Bell, Morris D; Fleming, Michael F	Journal of Autism and Developmental Disorders
A pilot study of the efficacy of a computerized executive functioning remediation training with game elements for children with ADHD in an outpatient setting: outcome on parent- and teacher-rated executive functioning and ADHD behavior	OBJECTIVE: This pilot study tested the short- and long-term efficacy (9 weeks follow-up) of an executive functioning (EF) remediation training with game elements for children with ADHD in an outpatient clinical setting, using a randomized controlled wait-list design. Furthermore, in a subsample, that is, those treated with methylphenidate, additive effects of the EF training were assessed. METHOD…	2014	2014-11	van der Oord, S.; Ponsioen, A. J. G. B.; Geurts, H. M.; Ten Brink, E. L.; Prins, P. J. M.	Journal of Attention Disorders
Effects of acute aerobic exercise on multiple aspects of executive function in preadolescent children	Objective: The current study assessed the effects of acute exercise on three core executive functions in preadolescents and controlled for the moderating role of age. Design: A true experimental design. Methods: Thirty-four third-grade children and 53 fifth-grade preadolescents were randomly assigned into either an acute exercise group or a control group. The exercise protocol was designed for ec…	2014	2014-11	Chen, Ai-Guo; Yan, Jun; Yin, Heng-Chan; Pan, Chien-Yu; Chang, Yu-Kai	Psychology of Sport and Exercise
Enhancing dentate gyrus function with dietary flavanols improves cognition in older adults	The dentate gyrus (DG) is a region in the hippocampal formation whose function declines in association with human aging and is therefore considered to be a possible source of age-related memory decline. Causal evidence is needed, however, to show that DG-associated memory decline in otherwise healthy elders can be improved by interventions that enhance DG function. We addressed this issue by firs…	2014	2014-12	Brickman, Adam M; Khan, Usman A; Provenzano, Frank A; Yeung, Lok-kin; Suzuki, Wendy; Schroeter, Hagen; Wall, Melanie; Sloan, Richard P; Small, Scott A	Nature Neuroscience
No effect of oral tyrosine on total tyrosine levels in breast milk: implications for dietary supplementation in early postpartum	Postpartum depression (PPD) is the most common complication of childbearing with a 13 % prevalence rate, and there is no widespread approach for prevention. There is an appealing theoretical rationale for oral tyrosine to help prevent PPD. However, the effect of oral tyrosine on its total and free concentrations in breast milk and plasma of breastfeeding mothers is not known. Twenty-four healthy …	2014	2014-12	Dowlati, Yekta; Ravindran, Arun V; Maheux, Maxim; Steiner, Meir; Stewart, Donna E; Meyer, Jeffrey H	Archives of Women's Mental Health
Effects of beverages with variable nutrients on rehydration and cognitive function	The purpose of the present study was to investigate the effect of carbohydrate-electrolyte solution (CE), lemon tea (LT), and distilled water (DW) on rehydration and cognitive performance after 60 min of moderate exercise. 9 healthy males and 10 eumenorrheic females completed 3 runs in a randomized crossover study design. During the 4-h recovery (REC) period, they consumed either a volume of CE, …	2014	2014-12	Wong, S. H. S.; Sun, F.-H.; Huang, W. Y. J.; Chen, Y.-J.	International Journal of Sports Medicine
Use of Controlled Diaphragmatic Breathing for the Management of Motion Sickness in a Virtual Reality Environment	Evidence indicates that activation of the parasympathetic nervous system (PNS) suppresses physiological responses associated with motion sickness. Research also shows paced breathing increases PNS activation; the current study examines the use of paced diaphragmatic breathing (DB) training to quell motion sickness symptoms. Healthy participants (N = 60) were pre-screened for motion sickness susce…	2014	2014-12	Russell, Matthew Edward; Brannon; Hoffman, Brittney; Stromberg, Sarah; Carlson, Charles R	Applied Psychophysiology and Biofeedback
Management of Cognitive Determinants in Senile Dementia of Alzheimer's Type: Therapeutic Potential of a Novel Polyherbal Drug Product	The enigmatic etiology of neurodegenerative diseases poses a challenge for the development of novel and efficient drugs. The objective of the present study was to evaluate the efficacy of a polyherbal (test) formulation on cognitive functions, inflammatory markers and oxidative stress in healthy elderly as well as senile dementia of Alzheimer's type (SDAT) patients. A randomized double-blind plac…	2014	2014-12	Sadhu, Ananya; Upadhyay, Prabhat; Agrawal, Aruna; Ilango, Kaliappan; Karmakar, Dipankar; Singh, Gur Prit Inder; Dubey, Govind Prasad	Clinical Drug Investigation
Training Versus Engagement As Paths to Cognitive Enrichment With Aging	While a training model of cognitive intervention targets the improvement of particular skills through instruction and practice, an engagement model is based on the idea that being embedded in an intellectually and socially complex environment can impact cognition, perhaps even broadly, without explicit instruction. We contrasted these 2 models of cognitive enrichment by randomly assigning healthy…	2014	2014-12	Stine-Morrow, Elizabeth A. L.; Payne, Brennan R.; Roberts, Brent W.; Kramer, Arthur F.; Morrow, Daniel G.; Payne, Laura; Hill, Patrick L.; Jackson, Joshua J.; Gao, Xuefei; Noh, Soo Rim; Janke, Megan C.; Parisi, Jeanine M.	Psychology and Aging
Exercise training and recreational activities to promote executive functions in chronic stroke: a proof-of-concept study	BACKGROUND: Stroke survivors represent a target population in need of intervention strategies to promote cognitive function and prevent dementia. Both exercise and recreational activities are promising strategies. We assessed the effect of a 6-month exercise and recreation program on executive functions in adults with chronic stroke. METHODS: A 6-month ancillary study within a multicentre randomi…	2015	2015-01	Liu-Ambrose, Teresa; Eng, Janice J.	Journal of Stroke and Cerebrovascular Diseases: The Official Journal of National Stroke Association
Breakfast glycaemic index and exercise: combined effects on adolescents' cognition	The aim of the present study was to examine the combined effects of breakfast glycaemic index (GI) and a mid-morning bout of exercise on adolescents' cognitive function. Participants were randomly allocated to a high or low GI breakfast group in a mixed research design, where each participant completed two experimental trials (exercise and resting). Forty-two adolescents (12.4±0.5 years old), und…	2015	2015-02	Cooper, Simon B.; Bandelow, Stephan; Nute, Maria L.; Morris, John G.; Nevill, Mary E.	Physiology & Behavior
Effect of tyrosine ingestion on cognitive and physical performance utilising an intermittent soccer performance test (iSPT) in a warm environment	The aim of this study was to investigate the effect of tyrosine (TYR) ingestion on cognitive and physical performance during soccer-specific exercise in a warm environment. Eight male soccer players completed an individualised 90 min soccer-simulation intermittent soccer performance test (iSPT), on a non-motorised treadmill, on two occasions, within an environmental chamber (25 °C, 40 % RH). Part…	2015	2015-02	Coull, Nicole A; Watkins, Samuel L; Aldous, Jeffrey W; F; Warren, Lee K; Chrismas, Bryna C; R; Dascombe, Benjamin; Mauger, Alexis R; Abt, Grant; Taylor, Lee	European Journal of Applied Physiology
The effects of acute aerobic exercise on the acquisition and retention of laparoscopic skills	Exercise is beneficial to learning. The purpose of this research was to determine whether an episode of aerobic exercise prior to practice improves the acquisition and retention of laparoscopic skills in the fundamentals of laparoscopic surgery (FLS) simulator. Baseline maximal physical fitness (VO2 max), performance on peg transfer (PT), pattern cut (PC), and intracorporeal suture (ICS) were mea…	2015	2015-02	Chartrand, Geneviève; Kaneva, Pepa; Kolozsvari, Nicoleta; Li, Chao; Petrucci, Andrea M; Mutter, Andrew F; Daskalopoulou, Stella S; Carli, Franco; Feldman, Liane S; Fried, Gerald M; Vassiliou, Melina C	Surgical Endoscopy
Dose-dependent changes in cognitive function with exercise augmentation for major depression: results from the TREAD study	Cognitive dysfunction has been repeatedly observed in major depressive disorder (MDD), particularly in areas of attention, verbal and nonverbal learning and memory, and executive functioning. Exercise has been shown to improve cognitive outcomes in other populations, including age-associated cognitive decline, but has not to our knowledge been investigated as an augmentation strategy in depressio…	2015	2015-02	Greer, Tracy L.; Grannemann, Bruce D.; Chansard, Matthieu; Karim, Alyzae I.; Trivedi, Madhukar H.	European Neuropsychopharmacology: The Journal of the European College of Neuropsychopharmacology
Cannabis and creativity: highly potent cannabis impairs divergent thinking in regular cannabis users	Cannabis users often claim that cannabis has the potential to enhance their creativity. Research suggests that aspects of creative performance might be improved when intoxicated with cannabis; however, the evidence is not conclusive. The aim of this study was to investigate the acute effects of cannabis on creativity. We examined the effects of administering a low (5.5 mg delta-9-tetrahydrocannab…	2015	2015-03	Kowal, Mikael A; Hazekamp, Arno; Colzato, Lorenza S; van Steenbergen, Henk; van der Wee, Nic J; A; Durieux, Jeffrey; Manai, Meriem; Hommel, Bernhard	Psychopharmacology
The Effect of Task Complexity on Iranian Pre-intermediate EFL Learners' Incidental Learning of Grammatical Collocations through Reading	The aim of this research was to examine the effect of task complexity instruction on EFL pre - intermediate learner's incidental learning of grammatical collocations through reading. To do so, the test of general English proficiency, OPT, was administered to 140 participants to homogenize subjects. Based on the mean score (X= 34.5) and standard deviation of students' scores (SD= 2.8), 90 subjects…	2015	2015-03	Shabanpour, Manzar; Marzban, Amir	Theory and Practice in Language Studies
Failure to identify an acute exercise effect on executive function assessed by the Wisconsin Card Sorting Test	Purpose: Acute exercise has been linked to the facilitation of executive function, but little is known regarding executive function assessed by the Wisconsin Card Sorting Test (WCST). The present research consisted of two experiments aimed to determine whether acute aerobic exercise influences successive WCST performance. Methods: In Study 1, 27 young adults were randomly assigned to the exercise…	2015	2015-03	Wang, Chun-Chih; Shih, Chia-Hao; Pesce, Caterina; Song, Tai-Fen; Hung, Tsung-Min; Chang, Yu-Kai	Journal of Sport and Health Science
The Changeability and Predictive Value of Dysfunctional Cognitions in Cognitive Behavior Therapy for Chronic Tinnitus	Multidimensional tinnitus models describe dysfunctional cognitions as a complicating factor in the process of tinnitus habituation. However, this concept has rarely been investigated in previous research. The present study investigated the effects of two cognitive-behavioral treatments on dysfunctional tinnitus-related cognitions in patients with chronic tinnitus. Furthermore, dysfunctional cogni…	2015	2015-04	Conrad, Isabell; Kleinstäuber, Maria; Jasper, Kristine; Hiller, Wolfgang; Andersson, Gerhard; Weise, Cornelia	International Journal of Behavioral Medicine
Mental fatigue does not affect maximal anaerobic exercise performance	(ProQuest: ... denotes formulae and/or non-USASCII text omitted; see image) Mental fatigue can negatively impact on submaximal endurance exercise and has been attributed to changes in perceived exertion rather than changes in physiological variables. The impact of mental fatigue on maximal anaerobic performance is, however, unclear. Therefore, the aim of the present study was to induce a state of…	2015	2015-04	Martin, Kristy; Thompson, Kevin G; Keegan, Richard; Ball, Nick; Rattray, Ben	European Journal of Applied Physiology
Computerized auditory cognitive training to improve cognition and functional outcomes in patients with heart failure: Results of a pilot study	Objectives: Feasibility and efficacy of computerized auditory cognitive training (ACT) was examined among patients with heart failure (HF). Background: Individuals with HF have four times increased risk of cognitive impairment, yet cognitive intervention studies are sparse. Methods: A pilot randomized controlled design was used. Results: The ACT group (n = 9) and control group (n = 8) had similar…	2015	2015-04	Athilingam, Ponrathi; Edwards, Jerri D.; Valdes, Elise G.; Ji, Ming; Guglin, Maya	Heart & Lung
Structural Brain Changes after Traditional and Robot-Assisted Multi-Domain Cognitive Training in Community-Dwelling Healthy Elderly	The purpose of this study was to investigate if multi-domain cognitive training, especially robot-assisted training, alters cortical thickness in the brains of elderly participants. A controlled trial was conducted with 85 volunteers without cognitive impairment who were 60 years old or older. Participants were first randomized into two groups. One group consisted of 48 participants who would rec…	2015	2015-04	Kim, Geon Ha; Jeon, Seun; Im, Kiho; Kwon, Hunki; Lee, Byung Hwa; Kim, Ga Young; Jeong, Hana; Han, Noh Eul; Seo, Sang Won; Cho, Hanna; Noh, Young; Park, Sang Eon; Kim, Hojeong; Hwang, Jung Won; Yoon, Cindy W; Kim, Hee Jin; Ye, Byoung Seok; Chin, Ju Hee; Kim, Jung-Hyun; Suh, Mee Kyung; Lee, Jong Min; Kim, Sung Tae; Choi, Mun-Taek; Kim, Mun Sang; Heilman, Kenneth M; Jeong, Jee Hyang; Na, Duk L	PLoS One
Cognitive and Typing Outcomes Measured Simultaneously with Slow Treadmill Walking or Sitting: Implications for Treadmill Desks	Purpose This study compared cognitive (attention, learning, and memory) and typing outcomes during slow treadmill walking or sitting. Seventy-five healthy individuals were randomly assigned to a treadmill walking group (n=37; 23 female) or sitting group (n=38; 17 female). Methods The treadmill walking group completed a series of tests while walking at 1.5 mph. The sitting group performed the same…	2015	2015-04	Larson, Michael J; LeCheminant, James D; Hill, Kyle; Carbine, Kaylie; Masterson, Travis; Christenson, Ed	PLoS One
Afternoon Nap and Bright Light Exposure Improve Cognitive Flexibility Post Lunch	Beneficial effects of napping or bright light exposure on cognitive performance have been reported in participants exposed to sleep loss. Nonetheless, few studies investigated the effect of these potential countermeasures against the temporary drop in performance observed in mid-afternoon, and even less so on cognitive flexibility, a crucial component of executive functions. This study investigat…	2015	2015-05	Slama, Hichem; Deliens, Gaétane; Schmitz, Rémy; Peigneux, Philippe; Leproult, Rachel	PLoS One
An ecological approach to cognitive enhancement: complex motor training	Cognitive training has received a lot of attention recently, yielding findings that can be conflicting and controversial. In this paper, we present a novel approach to cognitive training based on complex motor activities. In a randomized controlled design, participants were assigned to one of three conditions: aerobic exercise, working memory training or designed sport--an intervention specifical…	2015	2015-05	Moreau, David; Morrison, Alexandra B.; Conway, Andrew R. A.	Acta Psychologica
Rapid-Eye-Movement-Sleep (REM) Associated Enhancement of Working Memory Performance after a Daytime Nap	The main objective was to study the impact of a daytime sleep opportunity on working memory and the mechanism behind such impact. This study adopted an experimental design in a sleep research laboratory. Eighty healthy college students (Age:17-23, 36 males) were randomized to either have a polysomnography-monitored daytime sleep opportunity (Nap-group, n=40) or stay awake (Wake-group, n=40) betwe…	2015	2015-05	Lau, Esther YuetYing; Wong, Mark Lawrence; Lau, Kristy NgaTing; Hui, Florence WaiYing; Tseng, Chia-huei	PLoS One
The Influence of a Brief Mindfulness Exercise on Encoding of Novel Words in Female College Students	Based on research associating mindfulness with improvements in well-being, attention, and memory processes, brief mindfulness exercises may be helpful in enhancing the encoding of novel semantic information. We used a Swahili-English word pair association task to examine whether engaging in a brief mindfulness exercise enhanced the encoding of Swahili-English word pairs, thus improving long-term …	2015	2015-06	Bonamo, Kristin K.; Legerski, John-Paul; Thomas, Katie B.	Mindfulness
The benefits of nature experience: Improved affect and cognition	This study investigated the impact of nature experience on affect and cognition. We randomly assigned sixty participants to a 50-min walk in either a natural or an urban environment in and around Stanford, California. Before and after their walk, participants completed a series of psychological assessments of affective and cognitive functioning. Compared to the urban walk, the nature walk resulte…	2015	2015-06	Bratman, Gregory N.; Daily, Gretchen C.; Levy, Benjamin J.; Gross, James J.	Landscape and Urban Planning
Caffeine improves reaction time, vigilance and logical reasoning during extended periods with restricted opportunities for sleep	Various occupational groups are required to maintain optimal physical and cognitive function during overnight periods of wakefulness, often with less than optimal sleep. Strategies are required to help mitigate the impairments in cognitive function to help sustain workplace safety and productivity. To test the effectiveness of repeated 200 mg doses of caffeine on cognitive function and live-fire …	2015	2015-06	Kamimori, Gary H; Mclellan, Tom M; Tate, Charmaine M; Voss, David M; Niro, Phil; Lieberman, Harris R	Psychopharmacology
A novel approach to enhancing limb control in older adults	Two recent experiments have demonstrated that young adult participants were able to make faster and more harmonic movements in a typical reciprocal Fitts task (ID = 6) following a practice session of sine wave tracking (Boyle et al. in Exp Brain Res 223:377-387, 2012 ; J Mot Behav 46:277-285, 2014 ). The purpose of the present experiment was to replicate these findings with a young adult populati…	2015	2015-07	Boyle, Jason B; Kennedy, Deanna M; Shea, Charles H	Experimental Brain Research
Unraveling the effects of critical thinking instructions, practice, and self-explanation on students' reasoning performance	Acquisition of critical thinking skills is considered an important goal in higher education, but it is still unclear which specific instructional techniques are effective for fostering it. The main aim of this study was to unravel the impact of critical thinking instructions, practice, and self-explanation prompts during practice, on students' reasoning skills that are prone to bias. Another aim …	2015	2015-07	Heijltjes, Anita; van Gog, Tamara; Leppink, Jimmie; Paas, Fred	Instructional Science
Evaluating an Online Cognitive Training Platform for Older Adults: User Experience and Implementation Requirements	Decline of cognitive function is a part of aging. However, intensive cognitive training can improve important cognitive functions, such as attention and working memory. Because existing systems are not older adult-friendly and are usually not based on scientific evidence, an online platform was developed for cognitive training with information and communication features and evaluated in an 8-week…	2015	2015-08	Haesner, Marten; Steinert, Anika; O'Sullivan, Julie Lorraine; Weichenberger, Markus	Journal of Gerontological Nursing
Nurse-Enhanced Computerized Cognitive Training Increases Serum Brain-Derived Neurotropic Factor Levels and Improves Working Memory in Heart Failure	BACKGROUND: Memory loss is common in heart failure (HF) patients, but few interventions have been tested to treat it. The objective of this study was to evaluate efficacy of a cognitive training intervention, Brain Fitness, to improve memory, serum brain-derived neurotropic factor (BDNF) levels, working memory, processing speed, executive function, instrumental activities of daily living, mobilit…	2015	2015-08	Pressler, Susan J.; Titler, Marita; Koelling, Todd M.; Riley, Penny L.; Jung, Miyeon; Hoyland-Domenico, Lisa; Ronis, David L.; Smith, Dean G.; Bleske, Barry E.; Dorsey, Susan G.; Giordani, Bruno	Journal of Cardiac Failure
Situated navigational working memory: the role of positive mood	The perspective of situated cognition assumes that cognition is not separated from the context. In the present study, the issue if visuospatial memory and navigational working memory are situated was explored by manipulating participants' mood (positive, negative and neutral) while performing two different tasks. College students were randomly assigned to the group of positive, negative or neutra…	2015	2015-09	Palmiero, Massimiliano; Nori, Raffaella; Rogolino, Carmelo; D'Amico, Simonetta; Piccardi, Laura	Cognitive Processing
Effects of Integrated Physical Exercises and Gestures on Preschool Children's Foreign Language Vocabulary Learning	Issue Title: Special Issue: Mind Your Body: the Essential Role of Body Movements in Children's Learning Research suggests that integrating human movement into a cognitive learning task can be effective for learning due to its cognitive and physiological effects. In this study, the learning effects of enacting words through whole-body movements (i.e., physical exercise) and part-body movements (i.…	2015	2015-09	Mavilidi, Myrto-foteini; Okely, Anthony D; Chandler, Paul; Cliff, Dylan P; Paas, Fred	Educational Psychology Review
The effect of flavanol-rich cocoa on cerebral perfusion in healthy older adults during conscious resting state: a placebo controlled, crossover, acute trial	Rationale There has recently been increasing interest in the potential of flavanols, plant-derived compounds found in foods such as fruit and vegetables, to ameliorate age-related cognitive decline. Research suggests that cocoa flavanols improve memory and learning, possibly as a result of their anti-inflammatory and neuroprotective effects. These effects may be mediated by increased cerebral blo…	2015	2015-09	Lamport, Daniel J; Pal, Deepa; Moutsiana, Christina; Field, David T; Williams, Claire M; Spencer, Jeremy P; E; Butler, Laurie T	Psychopharmacology
Emotion and multimedia learning: an investigation of the effects of valence and arousal on different modalities in an instructional animation	Previous emotion studies in education have focused mainly on the superiority of positive emotion for learning performance (e.g., enjoyment) over negative emotion (e.g., fear). However, few studies have considered different arousal levels in terms of learners' emotion. For example, the effects of calm positive or negative emotion have not been discussed, when compared to arousing positive or negat…	2015	2015-09	Chung, Sungwon; Cheon, Jongpil; Lee, Kwang-woo	Instructional Science
The Effects of Computerized Cognitive Control Training on Community Adults with Depressed Mood	Background: Depression is frequently characterized by patterns of inflexible, maladaptive, and ruminative thinking styles, which are thought to result from a combination of decreased attentional control, decreased executive functioning, and increased negative affect. Cognitive Control Training (CCT) uses computer-based behavioral exercises with the aim of strengthening cognitive and emotional fun…	2015	2015-09	Calkins, Amanda W; McMorran, Katherine E; Siegle, Greg J; Otto, Michael W	Behavioural and Cognitive Psychotherapy
Watch Your Step Children! Learning Two-Digit Numbers Through Mirror-Based Observation of Self-Initiated Body Movements	Issue Title: Special Issue: Mind Your Body: the Essential Role of Body Movements in Children's Learning It was investigated whether task-related body movements yield beneficial effects on children's learning of two-digit numbers and whether these learning effects are affected by mirror-based self-observation of those movements. Participants were 118 first-graders, who were randomly assigned to tw…	2015	2015-09	Ruiter, Margina; Loyens, Sofie; Paas, Fred	Educational Psychology Review
The Benefits of Doubt: Cognitive Bias Correction Reduces Hasty Decision-Making in Schizophrenia	Many patients with schizophrenia display neuropsychological deficits in concert with cognitive biases, particularly the tendency to jump to conclusions (JTC). The present study examined the effects of a generic psychoeducational cognitive bias correction (CBC) program. We hypothesized that demonstrating the fallibility of human cognition to patients would diminish their susceptibility to the JTC …	2015	2015-10	Moritz, Steffen; Mayer-stassfurth, Helena; Endlich, Lisa; Andreou, Christina; Ramdani, Nora; Petermann, Franz; Balzan, Ryan P	Cognitive Therapy and Research
Naltrexone Maintenance Decreases Cannabis Self-Administration and Subjective Effects in Daily Cannabis Smokers	Given that cannabis use is increasing in the United States, pharmacological treatment options to treat cannabis use disorder are needed. Opioid antagonists modulate cannabinoid effects and may offer a potential approach to reducing cannabis use. In this double-blind, placebo-controlled human laboratory study, we assessed the effects of naltrexone maintenance on the reinforcing, subjective, psycho…	2015	2015-10	Haney, Margaret; Ramesh, Divya; Glass, Andrew; Pavlicova, Martina; Bedi, Gillinder; Cooper, Ziva D	Neuropsychopharmacology
Visuospatial working memory training facilitates visually-aided explicit sequence learning	Finger sequence learning requires visuospatial working memory (WM). However, the dynamics between age, WM training, and motor skill acquisition are unclear. Therefore, we examined how visuospatial WM training improves finger movement sequential accuracy in younger (n=26, 21.1±1.37years) and older adults (n=22, 70.6±4.01years). After performing a finger sequence learning exercise and numerical and…	2015	2015-10	Chan, John S. Y.; Wu, Qiaofeng; Liang, Danxia; Yan, Jin H.	Acta Psychologica
Combined exercise ameliorates ovariectomy-induced cognitive impairment by enhancing cell proliferation and suppressing apoptosis	OBJECTIVE: Estrogen plays an important role in cognitive function, including attention, learning, and memory, and affects the structure and function of brain areas. We investigated the effects of combined exercise on memory deficits induced by ovariectomy (OVX) in relation to cell proliferation and apoptosis in the hippocampus. METHODS: Rats were randomly divided into four groups: sham, sham and …	2016	2016-01	Kim, Tae-Woon; Kim, Chang-Sun; Kim, Ji-Yeon; Kim, Chang-Ju; Seo, Jin-Hee	Menopause (New York, N.Y.)
Exercising attention within the classroom		2010	2010-10	Hill, Liam; Williams, Justin H G; Aucott, Lorna; Milne, June; Thomson, Jenny; Greig, Jessie; Munro, Val; Mon-Williams, Mark	Developmental Medicine and Child Neurology
Oral tyrosine supplementation improves exercise capacity in the heat	Increased brain dopamine availability improves prolonged exercise tolerance in the heat. It is unclear whether supplementing the amino-acid precursor of dopamine increases exercise capacity in the heat. Eight healthy male volunteers [mean age 32 ± 11 (SD) years; body mass 75.3 ± 8.1 kg; peak oxygen uptake ( V &dot; O 2 peak ) 3.5 ± 0.3 L min^sup -1^] performed two exercise trials separated by at …	2011	2011-12	Tumilty, Les; Davison, Glen; Beckmann, Manfred; Thatcher, Rhys	European Journal of Applied Physiology
Effects of dual-task cognitive-gait intervention on memory and gait dynamics in older adults with a history of falls: A preliminary investigation	The present study highlights the effects of the dual-task cognitive-gait intervention (CGI) on working memory and gait functions in older adults with a history of falls. Thirteen older adults with a history of falls were recruited from local community centers and randomly stratified into either the control (n = 5) or experimental (n = 8) group. The experimental group received the dual-task cognit…	2009	2009	You, Joshua H.; Shetty, Anand; Jones, Tawaih; Shields, Kimberli; Belay, Yordanos; Brown, Deborah	Neurorehabilitation
How does exercise benefit performance on cognitive tests in primary-school pupils?		2011	2011-07	Hill, Liam J B; Williams, Justin H G; Aucott, Lorna; Thomson, Jenny; Mon-Williams, Mark	Developmental Medicine and Child Neurology
Using Neuroplasticity-Based Auditory Training to Improve Verbal Memory in Schizophrenia	Objective: Impaired verbal memory in schizophrenia is a key rate-limiting factor for functional outcome, does not respond to currently available medications, and shows only modest improvement after conventional behavioral remediation. The authors investigated an innovative approach to the remediation of verbal memory in schizophrenia, based on principles derived from the basic neuroscience of lea…	2009	2009-07	Fisher, Melissa; Holland, Christine; Merzenich, Michael M.; Vinogradov, Sophia	American Journal of Psychiatry
Adjusting brain dynamics in schizophrenia by means of perceptual and cognitive training.	In a previous report we showed that cognitive training fostering auditory-verbal discrimination and working memory normalized magnetoencephalographic (MEG) M50 gating ratio in schizophrenia patients. The present analysis addressed whether training effects on M50 ratio and task performance are mediated by changes in brain oscillatory activity. Such evidence should improve understanding of the role…	2012	2012	Popov, Tzvetan; Rockstroh, Brigitte; Weisz, Nathan; Elbert, Thomas; Miller, Gregory A	PloS one
Evaluation of a new computerized psychometric test battery: Effects of zolpidem and caffeine	Objective: To evaluate the effects of centrally active drugs using a new indigenously developed automated psychometric test system and compare the results with that obtained using pencil- and paper-based techniques. Materials and Methods: The tests were standardized in 24 healthy participants. Reproducibility of the test procedure was evaluated by performing the tests by a single experimenter on …	2013	2013	Pilli, Raveendranadh; Naidu, MUR; Pingali, Usharani; Shobha, J	Journal of Pharmacology and Pharmacotherapeutics
Effects of Blended Instructional Models on Math Performance	A pretest-posttest cluster-randomized trial involving 31 middle schools and 335 students with disabilities tested the effects of combining explicit and anchored instruction on fraction computation and problem solving. Results of standardized and researcher-developed tests showed that students who were taught with the blended units outscored students in Business As Usual classes. Students made the…	2014	2014	Bottge, Brian A; Ma, Xin; Gassaway, Linda; Toland, Michael D; Butler, Mark; Cho, Sun-Joo	Exceptional Children
Forced arm use is superior to voluntary training for motor recovery and brain plasticity after cortical ischemia in rats	Doc number: 3 Abstract Background and purpose: Both the immobilization of the unaffected arm combined with physical therapy (forced arm use, FAU) and voluntary exercise (VE) as model for enriched environment are promising approaches to enhance recovery after stroke. The genomic mechanisms involved in long-term plasticity changes after different means of rehabilitative training post-stroke are lar…	2014	2014	Schneider, Armin; Rogalewski, Andreas; Wafzig, Oliver; Kirsch, Friederike; Gretz, Norbert; Krüger, Carola; Diederich, Kai; Pitzer, Claudia; Laage, Rico; Plaas, Christian; Vogt, Gerhard; Minnerup, Jens; Schäbitz, Wolf-Rüdiger	Journal of Experimental Stroke & Translational Medicine
Effect of augmenting cholinergic function on gait and balance	Background Impaired mobility and falls are clinically important complications of Parkinson's disease (PD) and a major detractor from quality of life for which there are limited therapies. Pathological, neuroimaging and clinical evidence suggest that degeneration of cholinergic systems may contribute to impairments of balance and gait in PD. The proposed trial will examine the effects of augmentat…	2015	2015	Mancini, Martina; Fling, Brett W; Gendreau, Anne; Lapidus, Jodi; Horak, Fay B; Chung, Kathy; Nutt, John G	BMC Neurology
Goal-Directed Resilience in Training (GRIT): A Biopsychosocial Model of Self-Regulation, Executive Functions, and Personal Growth (Eudaimonia) in Evocative Contexts of PTSD, Obesity, and Chronic Pain	This paper presents a biopsychosocial model of self-regulation, executive functions, and personal growth that we have applied to Goal-Directed Resilience in Training (GRIT) interventions for posttraumatic stress disorder (PTSD), obesity, and chronic pain. Implications of the training for the prevention of maladaptation, including psychological distress and health declines, and for promoting healt…	2015	2015	Kent, Martha; Rivers, Crystal T; Wrenn, Glenda	Behavioral Sciences
The wellness incentives and navigation project: design and methods	Background About 35 % of non-elderly U.S. adult Medicaid enrollees have a behavioral health condition, such as anxiety, mood disorders, substance use disorders, and/or serious mental illness. Individuals with serious mental illness, in particular, have mortality rates that are 2 to 3 times higher as the general population, which are due to multiple factors including inactivity, poor nutrition, an…	2015	2015	Shenkman, Elizabeth; Muller, Keith; Vogel, Bruce; Nixon, Sara Jo; Wagenaar, Alexander C; Case, Kimberly; Guo, Yi; Wegman, Martin; Aric, Jessie; Stoner, Dena	BMC Health Services Research
Effect of uninostril yoga breathing on brain hemodynamics: A functional near-infrared spectroscopy study	Objectives: To measure the effect of the right and left nostril yoga breathing on frontal hemodynamic responses in 32 right handed healthy male subjects within the age range of 18-35 years (23.75 +- 4.14 years). Materials and Methods: Each subject practiced right nostril yoga breathing (RNYB), left nostril yoga breathing (LNYB) or breath awareness (BA) (as control) for 10 min at the same time of …	2016	2016	Singh, Karamjit; Bhargav, Hemant; Srinivasan, T	International Journal of Yoga
Roles of the right dorsolateral prefrontal cortex during physical fatigue: a magnetoencephalographic study	Background: A regulation system in the central nervous system plays an important role in controlling physical performance during physical fatigue. Purpose: To clarify the neural mechanisms of this regulation system during physical fatigue using magnetoencephalography (MEG) and a classical conditioning technique. Methods: Eleven right-handed, healthy volunteers participated in this study. On the f…	2016	2016	Tanaka, Masaaki; Ishii, Akira; Watanabe, Yasuyoshi	Fatigue-Biomedicine Health and Behavior
Effect of sensory integration training on executive functions of children with attention deficit hyperactivity disorder	Aim of the study: Sensory integration is the process by which information from our senses (touch, sight, hearing, taste, smell, as well as balance) is interpreted by the brain so that we can respond appropriately to our environment. Attention deficit hyperactivity disorder (ADHD) is a complex neurological condition that is characterized by developmentally inappropriate levels of inattention, hype…	2016	2016	paper, Original	Neuropsychiatria i Neuropsychologia
Protective effects of forced exercise against nicotine-induced anxiety, depression and cognition impairment in rat	Background: Nicotine is one of the psychostimulant agents displaying parasympathomimetic activity; the chronic neurochemical and behavioral effects of nicotine remain unclear. Exercise lowers stress and anxiety and can act as a non-pharmacologic neuroprotective agent. In this study, the protective effects of exercise in nicotine withdrawal syndrome-induced anxiety, depression, and cognition impai…	2016	2016	Motaghinejad, Majid; Fatima, Sulail; Karimian, Morteza; Ganji, Saeid	Journal of Basic and Clinical Physiology and Pharmacology
Effect of cessation of GH treatment on cognition during transition phase in Prader-Willi syndrome: results of a 2-year crossover GH trial	Background Patients with Prader-Willi syndrome (PWS) have a cognitive impairment. Growth hormone (GH) treatment during childhood improves cognitive functioning, while cognition deteriorates in GH-untreated children with PWS. Cessation of GH treatment at attainment of adult height (AH) might deteriorate their GH-induced improved cognition, while continuation might benefit them. We, therefore, inve…	2016	2016	Kuppens, R J; Mahabier, E F; Bakker, N E; Siemensma, E P C; Donze, S H; Hokken-Koelega, A C S	Orphanet Journal of Rare Diseases
Transcranial electric stimulation and neurocognitive training in clinically depressed patients: a pilot study of the effects on rumination.	Rumination is a cognitive-affective thinking style that plays a key role in the onset and maintenance of depression. Recently, it was shown that clinically depressed patients who received a neurocognitive training - involving two weeks of repetitive cognitive control exercises that necessitate prefrontal engagement - are more able to control over ruminative negative thoughts than patients who onl…	2015	2015-03-03	Vanderhasselt, Marie-Anne; De Raedt, Rudi; Namur, Victoria; Lotufo, Paulo A; Bensenor, Isabela M; Boggio, Paulo S; Brunoni, Andre R	Progress in neuro-psychopharmacology & biological psychiatry
The effects of chronic trans-resveratrol supplementation on aspects of cognitive function, mood, sleep, health and cerebral blood flow in healthy, young humans	Single doses of resveratrol have previously been shown to increase cerebral blood flow (CBF) with no clear effect on cognitive function or mood in healthy adults. Chronic resveratrol consumption may increase the poor bioavailability of resveratrol or otherwise potentiate its psychological effects. In this randomised, double-blind, placebo-controlled, parallel-groups study, a total of sixty adults…	2015	2015-11-14	Wightman, Emma L; Haskell-Ramsay, Crystal F; Reay, Jonathon L; Williamson, Gary; Dew, Tristan; Zhang, Wei; Kennedy, David O	The British Journal of Nutrition
Diet-induced changes in iron and n-3 fatty acid status and associations with cognitive performance in 8-11-year-old Danish children: secondary analyses of the Optimal Well-Being, Development and Health for Danish Children through a Healthy New Nordic Diet School Meal Study	Fe and n-3 long-chain PUFA (n-3 LCPUFA) have both been associated with cognition, but evidence remains inconclusive in well-nourished school-aged children. In the Optimal Well-Being, Development and Health for Danish Children through a Healthy New Nordic Diet (OPUS) School Meal Study, the 3-month intervention increased reading performance, inattention, impulsivity and dietary intake of fish and F…	2015	2015-11-28	Sørensen, Louise Bergmann; Damsgaard, Camilla Trab; Dalskov, Stine-Mathilde; Petersen, Rikke Agnete; Egelund, Niels; Dyssegaard, Camilla Brørup; Stark, Ken D; Andersen, Rikke; Tetens, Inge; Astrup, Arne; Michaelsen, Kim Fleisher; Lauritzen, Lotte	The British Journal of Nutrition
Neuroenhancement of Memory for Children with Autism by a Mind-Body Exercise	The memory deficits found in individuals with autism spectrum disorder (ASD) may be caused by the lack of an effective strategy to aid memory. The executive control of memory processing is mediated largely by the timely coupling between frontal and posterior brain regions. The present study aimed to explore the potential effect of a Chinese mind body exercise, namely Nei Gong, for enhancing learn…	2015	2015-12-11	Chan, Agnes S.; Han, Yvonne M. Y.; Sze, Sophia L.; Lau, Eliza M.	Frontiers in Psychology
Effects of Motivational Self-Talk on Endurance and Cognitive Performance in the Heat	PURPOSE: We tested the effectiveness of a two-week motivational self-talk (MST) intervention - specific to heat tolerance - on endurance capacity and cognitive function in the heat. METHODS: Eighteen trained male (n=14) and female (n=4) cyclists randomly received two weeks of MST training (n=9) or a control regimen (CON, n=9). The experimental protocol was a PRE/POST design consisting of 30 min o…	2016	2016-08-30	Wallace, Phillip J.; McKinlay, Brandon J.; Coletta, Nico A.; Vlaar, Janae I.; Taber, Michael J.; Wilson, Philip M.; Cheung, Stephen S.	Medicine and Science in Sports and Exercise
Neural correlates of a single-session massage treatment	The current study investigated the immediate neurophysiological effects of different types of massage in healthy adults using functional magnetic resonance imaging (fMRI). Much attention has been given to the default mode network, a set of brain regions showing greater activity in the resting state. These regions (i.e. insula, posterior and anterior cingulate, inferior parietal and medial prefron…	2012	2012-03	Sliz, D; Smith, A; Wiebking, C; Northoff, G; Hayley, S	Brain Imaging and Behavior
Melatonin improves spatial navigation memory in male diabetic rats	The aim of the present study was to evaluate the effect of melatonin as an antioxidant on spatial navigation memory in male diabetic rats. Thirty-two male white Wistar rats weighing 200 ± 20 g were divided into four groups, randomly: control, melatonin, diabetic and melatonin-treated diabetic. Experimental diabetes was induced by intraperitoneal injection of 50 mg kg^sup -1^ streptozotocin. Melat…	2012	2012-09	Babaei-Balderlou, Farrin; Zare, Samad	Veterinary Research Forum
Mental exercises for cognitive function: clinical evidence.	The purpose of this study was to examine the beneficial effects of a new cognitive intervention program designed for the care and prevention of dementia, namely Learning Therapy. The training program used systematized basic problems in arithmetic and Japanese language as training tasks. In study 1, 16 individuals in the experimental group and 16 in the control group were recruited from a nursing …	2013	2013-01	Kawashima, Ryuta	Journal of preventive medicine and public health = Yebang Ŭihakhoe chi
The Effect of Synchronized Running Activity with Chronic Stress on Passive Avoidance Learning and Body Weight in Rats	Background: Different stressors induce learning and memory impairment and physical activity influence learning and memory enhancement. In this research, we investigated the effect of synchronized running activity with stress on acquisition and retention time of passive avoidance test. Methods: Male Wistar rats were randomly divided into five groups as follows: Control (Co), Sham (Sh), Exercise (E…	2013	2013-04	Radahmadi, Maryam; Alaei, Hojjatallah; Sharifi, Mohammad Reza; Hosseini, Nasrin	International Journal of Preventive Medicine
One-year repeated cycles of cognitive training (CT) for Alzheimer's disease.	Recent research suggests that a combination of both pharmacological and psychosocial treatments targeting cognitive functions improves cognition in patients with Alzheimer's disease (AD). The present study evaluated the effectiveness of a 1-year cognitive training (CT) by comparing the cognitive performance of 16 patients with AD treated with CT and cholinesterase inhibitors (ChEIs) (experimental…	2013	2013-08	Bergamaschi, Susanna; Arcara, Giorgio; Calza, Attilio; Villani, Daniele; Orgeta, Vasiliki; Mondini, Sara	Aging clinical and experimental research
THE EFFECT OF USING PICTOGLOSS ON IRANIAN EFL LEARNERS' READING COMPREHENSION ABILITY	The present study aimed to investigate the effect of using pictoglosses as a classroom activity in teaching English reading comprehension skill on Iranian EFL learners' reading comprehension ability. The questions this study tried to answer were 1) whether using pictoglosses might enhance a more acceptable reading comprehension performance in Iranian learners of English at university level, 2) wh…	2014	2014-03	Khoshkar, Azra; Nimvari, Ali Asghar Eshagh	Modern Journal of Language Teaching Methods
Effects of risperidone and aripiprazole on neurocognitive rehabilitation for schizophrenia.	Methods to improve neurocognitive impairments are of important research interest. This study sought to examine the synergistic effects of neurocognitive rehabilitation and antipsychotics for schizophrenia. Subjects were 43 patients diagnosed with schizophrenia or schizoaffective disorder in a randomized trial of the effects of neurocognitive rehabilitation or a quasi-randomized experimental trial…	2014	2014-06	Matsuda, Yasuhiro; Sato, Sayaka; Iwata, Kazuhiko; Furukawa, Shunichi; Hatsuse, Norifumi; Watanabe, Yukako; Anzai, Nobuo; Kishimoto, Toshifumi; Ikebuchi, Emi	Psychiatry and clinical neurosciences
Increased functional connectivity within memory networks following memory rehabilitation in multiple sclerosis	Issue Title: Special Issue: Neuroimaging and Rehabilitation Identifying effective behavioral treatments to improve memory in persons with learning and memory impairment is a primary goal for neurorehabilitation researchers. Memory deficits are the most common cognitive symptom in multiple sclerosis (MS), and hold negative professional and personal consequences for people who are often in the prim…	2014	2014-09	Leavitt, Victoria M; Wylie, Glenn R; Girgis, Peter A; Deluca, John; Chiaravalloti, Nancy D	Brain Imaging and Behavior
Working memory training and semantic structuring improves remembering future events, not past events.	Objectives. Memory training in combination with practice in semantic structuring and word fluency has been shown to improve memory performance. This study investigated the efficacy of a working memory training combined with exercises in semantic structuring and word fluency and examined whether training effects generalize to other cognitive tasks. Methods. In this double-blind randomized control …	2015	2015-01	Richter, Kim Merle; Mödden, Claudia; Eling, Paul; Hildebrandt, Helmut	Neurorehabilitation and neural repair
Breathing biofeedback as an adjunct to exposure in cognitive behavioral therapy hastens the reduction of PTSD symptoms: a pilot study.	Although trauma-focused cognitive behavioral therapy (TF-CBT) with exposure is an effective treatment for posttraumatic stress disorder (PTSD), not all patients recover. Addition of breathing biofeedback to exposure in TF-CBT is suggested as a promising complementary technique to improve recovery of PTSD symptoms. Patients (n = 8) with chronic PTSD were randomized to regular TF-CBT or TF-CBT with…	2015	2015-03	Rosaura Polak, A; Witteveen, Anke B; Denys, Damiaan; Olff, Miranda	Applied psychophysiology and biofeedback
A low-cost cognitive rehabilitation with a commercial video game improves sustained attention and executive functions in multiple sclerosis: a pilot study	OBJECTIVE: To evaluate the effectiveness of a home-based cognitive rehabilitation (CR) program based on the video game Dr Kawashima's Brain Training (DKBT; Nintendo, Japan), in improving attention, processing speed, and working memory of patients with multiple sclerosis (MS). METHODS: This was a randomized, wait-list control study. Patients with MS and failure in at least one between Stroop Test …	2015	2015-06	De Giglio, Laura; De Luca, Francesca; Prosperini, Luca; Borriello, Giovanna; Bianchi, Valentina; Pantano, Patrizia; Pozzilli, Carlo	Neurorehabilitation and Neural Repair
Training executive function in preschoolers reduce externalizing behaviors	In this research we want to observe, in preschool children, and with an experimental design, whether a cognitive intervention aiming at enhancing inhibition capacities would have an impact not only on executive functions but also lead to behavioral changes with a decrease in external behavioral problems (EB). Forty-seven normally developed preschoolers (mean age of 60 months) took part in a prete…	2015	2015-06	Volckaert, Alexandra Maria S.; Noel, Marie-Pascale	Trends in Neuroscience and Education
Effects of Intranasal Oxytocin on Steroid Hormones in Men and Women	Background: Recent interest in the social and cognitive effects of intranasal oxytocin prompts a need for understanding its physiological effects in humans. Few studies have examined the effects of intranasal oxytocin on steroid hormones. Filling this gap is especially important given the evidence that steroid hormones participate in some of the same behavioral functions as oxytocin, e.g. in stre…	2015	2015-09	Wirth, Michelle M; Gaffey, Allison E; Martinez, Brandy S	Neuropsychobiology
Abacus Training Affects Math and Task Switching Abilities and Modulates Their Relationships in Chinese Children	Our previous work demonstrated that abacus-based mental calculation (AMC), a traditional Chinese calculation method, could help children improve their math abilities (e.g. basic arithmetical ability) and executive function (e.g. working memory). This study further examined the effects of long-term AMC training on math ability in visual-spatial domain and the task switching component of executive …	2015	2015-10	Wang, Chunjie; Geng, Fengji; Yao, Yuan; Weng, Jian; Hu, Yuzheng; Chen, Feiyan	PLoS One
Delayed Positive Effects of an Acute Bout of Coordinative Exercise on Children's Attention	Since attention is an important prerequisite for learning, it is particularly worthwhile to promote it in schools, through specific interventions. The present study examined the effects of an acute bout of coordinative exercise in physical education on the attention of primary school children. A total of 90 fifth grade primary school children (41 boys, 49 girls; M = 11.0 yr., SD = 0.6) participat…	2015	2015-10	Schmidt, Mirko; Egger, Fabienne; Conzelmann, Achim	Perceptual and Motor Skills
Performance of Dental Hygiene Students in Mass Fatality Training and Radiographic Imaging of Dental Remains	Mass fatality incidents can overwhelm local, state and national resources quickly. Dental hygienists are widely distributed and have the potential to increase response teams' capacity. However, appropriate training is required. The literature is void of addressing this type of training for dental hygienists and scant in dentistry. Hence, the purpose of this study was to assess one facet of such t…	2015	2015-10	Newcomb, Tara L, BSDH, MS; Bruhn, Ann M, BSDH, MS; Ulmer, Loreta H, EdD; Diawara, Norou, PhD	Journal of Dental Hygiene (Online)
Aerobic and Cognitive Exercise (ACE) Pilot Study for Older Adults: Executive Function Improves with Cognitive Challenge While Exergaming	Dementia cases are increasing worldwide; thus, investigators seek to identify interventions that might prevent or ameliorate cognitive decline in later life. Extensive research confirms the benefits of physical exercise for brain health, yet only a fraction of older adults exercise regularly. Interactive mental and physical exercise, as in aerobic exergaming, not only motivates, but has also been…	2015	2015-11	Barcelos, Nicole; Shah, Nikita; Cohen, Katherine; Hogan, Michael J; Mulkerrin, Eamon; Arciero, Paul J; Cohen, Brian D; Kramer, Arthur F; Anderson-Hanley, Cay	Journal of the International Neuropsychological Society : JINS
Amygdala-Hippocampal Connectivity Changes During Acute Psychosocial Stress: Joint Effect of Early Life Stress and Oxytocin	Previous evidence shows that acute stress changes both amygdala activity and its connectivity with a distributed brain network. Early life stress (ELS), especially emotional abuse (EA), is associated with altered reactivity to psychosocial stress in adulthood and moderates or even reverses the stress-attenuating effect of oxytocin (OXT). The neural underpinnings of the interaction between ELS and…	2015	2015-11	Fan, Yan; Pestke, Karin; Feeser, Melanie; Aust, Sabine; Pruessner, Jens C; Böker, Heinz; Bajbouj, Malek; Grimm, Simone	Neuropsychopharmacology
Combined social cognitive and neurocognitive rehabilitation strategies in schizophrenia: neuropsychological and psychopathological influences on Theory of Mind improvement	Background Neurocognitive and social cognitive impairments represent important treatment targets in schizophrenia, as they are significant predictors of functional outcome. Different rehabilitative interventions have recently been developed, addressing both cognitive and psychosocial domains. Although promising, results are still heterogeneous and predictors of treatment outcome are not yet ident…	2015	2015-11	Bechi, M; Bosia, M; Spangaro, M; Buonocore, M; Cocchi, F; Pigoni, A; Piantanida, M; Guglielmino, C; Bianchi, L; Smeraldi, E; Cavallaro, R	Psychological Medicine
The Effects of Age, Priming, and Working Memory on Decision-Making	In the current study, we examined the effects of priming and personality on risky decision-making while playing the Game of Dice Task (GDT). In the GDT, participants decide how risky they wish to be on each trial. In this particular study prior to playing the GDT, participants were randomly assigned to one of three priming conditions: Risk-Aversive, Risk-Seeking, or Control. In the Risk-Seeking c…	2016	2016-01	Wood, Meagan; Black, Sheila; Gilpin, Ansley	International Journal of Environmental Research and Public Health
Acute Effects of Intoxication and Arousal on Approach/Avoidance Biases Toward Sexual Risk Stimuli in Heterosexual Men	This study tested the effects of alcohol intoxication and physiological arousal on cognitive biases toward erotic stimuli and condoms. Ninety-seven heterosexual men were randomized to 1 of 6 independent conditions in a 2 (high arousal or control) × 3 (alcohol target BAC = 0.08, placebo, or juice control) design and then completed a variant of the Approach-Avoidance Task (AAT). The AAT assessed re…	2016	2016-01	Simons, Jeffrey S; Maisto, Stephen A; Wray, Tyler B; Emery, Noah N	Archives of Sexual Behavior
Developing psychological capital through mindfulness based stress reduction (MBSR) therapy	Many people find it hard to cope with the pressures of modern living. Every day, a quarter of a million people miss work because of stress, with 75 percent of all illnesses thought to be stress-related. And when times are hard, it can be difficult to see the light at the end of the tunnel. Cultivating mindfulness is the key to overcome suffering and recognize natural wisdom: both our own and othe…	2016	2016-01	Jain, Himani; Singh, Rohtash	Indian Journal of Health and Wellbeing
Fish oil supplementation increases event-related posterior cingulate activation in older adults with subjective memory impairment	Objective To determine the effects of long-chain omega-3 (LCn-3) fatty acids found in fish oil, including eicosapentaenoic acid (EPA) and docosahexaenoic acid (DHA), on cortical blood oxygen level-dependent (BOLD) activity during a working memory task in older adults with subjective memory impairment. Design Randomized, double-blind, placebo-controlled study. Setting Academic medical center. Part…	2016	2016-02	Boespflug, E L; Mcnamara, R K; Eliassen, J C; Schidler, M D; Krikorian, Robert	The Journal of Nutrition, Health & Aging
The impact of a home-based computerized cognitive training intervention on fall risk measure performance in community dwelling older adults, a pilot study	Objectives Cognitive intervention studies have reported improvements in various domains of cognition as well as a transfer effect of improved function post training. Despite the availability of web based cognitive training programs, most intervention studies have been performed under the supervision of researchers. Therefore, the purpose of this study was to first, examine the feasibility of a si…	2016	2016-02	Blackwood, J; Shubert, T; Fogarty, K; Chase, C	The Journal of Nutrition, Health & Aging
Effect of local versus remote tonic heat pain during training on acquisition and retention of a finger-tapping sequence task	Although pain is present in a large proportion of patients receiving rehabilitation, its impact on motor learning is still unclear, especially in the case of neuropathic pain that is not tightly linked to specific movements. The aim of this study was to determine the effect of local and remote tonic cutaneous heat pain applied during training on motor learning of a finger-tapping sequence task. F…	2016	2016-02	Bilodeau, Marie-claude; Roosink, Meyke; Mercier, Catherine	Experimental Brain Research
Consumption of dairy products and cognitive functioning: Findings from the SU.VI.MAX 2 study	Objectives Research concerning the link between dairy product intake and cognition is scant while experimental studies suggest links through various biological mechanisms. This study's objective was to examine the cross-time associations of total and specific dairy product consumption with cognitive performance in aging adults. We also explored compliance with dairy intake recommendations in Fran…	2016	2016-02	Kesse-guyot, Emmanuelle; Assmann, K E; Andreeva, V A; Ferry, M; Hercberg, S; Galan, P	The Journal of Nutrition, Health & Aging
Working memory training in children: Effectiveness depends on temperament	Studies revealing transfer effects of working memory (WM) training on non-trained cognitive performance of children hold promising implications for scholastic learning. However, the results of existing training studies are not consistent and provoke debates about the potential and limitations of cognitive enhancement. To examine the influence of individual differences on training outcomes is a pr…	2016	2016-02	Studer-Luethi, Barbara; Bauer, Catherine; Perrig, Walter J	Memory & Cognition
Oxytocin Facilitates Pavlovian Fear Learning in Males	In human evolution, social group living and Pavlovian fear conditioning have evolved as adaptive mechanisms promoting survival and reproductive success. The evolutionarily conserved hypothalamic peptide oxytocin is a key modulator of human sociality, but its effects on fear conditioning are still elusive. In the present randomized controlled study involving 97 healthy male subjects, we therefore …	2016	2016-03	Eckstein, Monika; Scheele, Dirk; Patin, Alexandra; Preckel, Katrin; Becker, Benjamin; Walter, Annika; Domschke, Katharina; Grinevich, Valery; Maier, Wolfgang; Hurlemann, René	Neuropsychopharmacology
Positive Allosteric Modulator of GABA Lowers BOLD Responses in the Cingulate Cortex	Knowledge about the neural underpinnings of the negative blood oxygen level dependent (BOLD) responses in functional magnetic resonance imaging (fMRI) is still limited. We hypothesized that pharmacological GABAergic modulation attenuates BOLD responses, and that blood concentrations of a positive allosteric modulator of GABA correlate inversely with BOLD responses in the cingulate cortex. We inve…	2016	2016-03	Walter, Susanna A; Forsgren, Mikael; Lundengård, Karin; Simon, Rozalyn; Nilsson, Maritha Torkildsen; Söderfeldt, Birgitta; Lundberg, Peter; Engström, Maria	PLoS One
Testing the Generalizability of Impulse Control Problems in Compulsive Buying	The present study investigated whether impulse control problems in compulsive buying are specific to consumer products, and are influenced by arousal or gender. Compulsive buyers (n = 52, mean age = 25.02, SD = 7.93, 45% male) and controls (n = 51, mean age = 28.36, SD = 13.51, 52% male) were screened using the Compulsive Buying Scale. Participants were randomized to an arousal induction (or not)…	2016	2016-04	Hague, Ben; Kellett, Stephen; Sheeran, Paschal	Journal of Social and Clinical Psychology
Sustained Modafinil Treatment Effects on Control-Related Gamma Oscillatory Power in Schizophrenia	Control-related cognitive processes such as rule selection and maintenance are associated with cortical oscillations in the gamma range, and modulated by catecholamine neurotransmission. Control-related gamma power is impaired in schizophrenia, and an understudied treatment target. It remains unknown whether pro-catecholamine pharmacological agents augment control-related gamma oscillations in sc…	2016	2016-04	Minzenberg, Michael J; Yoon, Jong H; Cheng, Yaoan; Carter, Cameron S	Neuropsychopharmacology
Mindfulness Enhances Episodic Memory Performance: Evidence from a Multimethod Investigation	Training in mindfulness, classically described as a receptive attentiveness to present events and experiences, has been shown to improve attention and working memory. Both are key to long-term memory formation, and the present three-study series used multiple methods to examine whether mindfulness would enhance episodic memory, a key form of long-term memory. In Study 1 (N = 143), a self-reported…	2016	2016-04	Brown, Kirk Warren; Goodman, Robert J; Ryan, Richard M; Analayo, Bhikkhu	PLoS One
Dopamine Depletion Reduces Food-Related Reward Activity Independent of BMI	Reward sensitivity and possible alterations in the dopaminergic-reward system are associated with obesity. We therefore aimed to investigate the influence of dopamine depletion on food-reward processing. We investigated 34 female subjects in a randomized placebo-controlled, within-subject design (body mass index (BMI)=27.0 kg/m 2 ±4.79 SD; age=28 years ±4.97 SD) using an acute phenylalanine/tyros…	2016	2016-05	Frank, Sabine; Veit, Ralf; Sauer, Helene; Enck, Paul; Friederich, Hans-christoph; Unholzer, Theresa; Bauer, Ute-maria; Linder, Katarzyna; Heni, Martin; Fritsche, Andreas; Preissl, Hubert	Neuropsychopharmacology
Effectiveness of a group-based program for parents of children with dyslexia	Parents of children with dyslexia experience more parenting stress and depressive symptoms than other parents. The purpose of this study was to evaluate the effects of a cognitive-behavioral group-based program for parents of dyslexic children on parenting stress levels, parent-child homework interactions and parental competencies. 39 children with dyslexia and their mothers were randomly assigne…	2016	2016-06	Multhauf, Bettina; Buschmann, Anke; Soellner, Renate	Reading and Writing
Greater Heart Rate Responses to Acute Stress Are Associated with Better Post-Error Adjustment in Special Police Cadets	High-stress jobs require both appropriate physiological regulation and behavioral adjustment to meet the demands of emergencies. Here, we investigated the relationship between the autonomic stress response and behavioral adjustment after errors in special police cadets. Sixty-eight healthy male special police cadets were randomly assigned to perform a first-time walk on an aerial rope bridge to i…	2016	2016-07	Yao, Zhuxi; Yuan, Yi; Buchanan, Tony W; Zhang, Kan; Zhang, Liang; Wu, Jianhui	PLoS One
Superior Inhibitory Control and Resistance to Mental Fatigue in Professional Road Cyclists	Purpose Given the important role of the brain in regulating endurance performance, this comparative study sought to determine whether professional road cyclists have superior inhibitory control and resistance to mental fatigue compared to recreational road cyclists. Methods After preliminary testing and familiarization, eleven professional and nine recreational road cyclists visited the lab on tw…	2016	2016-07	Martin, Kristy; Staiano, Walter; Menaspà, Paolo; Hennessey, Tom; Marcora, Samuele; Keegan, Richard; Thompson, Kevin G; Martin, David; Halson, Shona; Rattray, Ben	PLoS One
The rehabilitation of attention in patients with mild cognitive impairment and brain subcortical vascular changes using the Attention Process Training-II. The RehAtt Study: rationale, design and methodology	Cerebral small vessel disease (SVD) may cause attentional and executive cognitive deficits. No drug is currently available to improve cognitive performance or to prevent dementia in SVD patients, and cognitive rehabilitation could be a promising approach. We aimed to investigate: (1) the effectiveness of the Attention Process Training-II program in the rehabilitation of patients with mild cogniti…	2016	2016-10	Salvadori, Emilia; Poggesi, Anna; Valenti, Raffaella; Della Rocca, Eleonora; Diciotti, Stefano; Mascalchi, Mario; Inzitari, Domenico; Pantoni, Leonardo	Neurological Sciences
The Effectiveness of Daily Mindful Breathing Practices on Test Anxiety of Students	The present study examined the effectiveness of daily mindful breathing practices on test anxiety of university students. A total of 36 participants were randomly assigned to one of three conditions: a training mindful breathing condition (n = 12), a training cognitive reappraisal condition (contrast group, n = 12), and a non-training condition (control group, n = 12). Each of the participants tr…	2016	2016-10	Cho, Hyunju; Ryu, Seokjin; Noh, Jeeae; Lee, Jongsun	PLoS One
Genetic variation in catechol-O-methyltransferase modifies effects of clonidine treatment in chronic fatigue syndrome	Clonidine, an α2-adrenergic receptor agonist, decreases circulating norepinephrine and epinephrine, attenuating sympathetic activity. Although catechol-O-methyltransferase (COMT) metabolizes catecholamines, main effectors of sympathetic function, COMT genetic variation effects on clonidine treatment are unknown. Chronic fatigue syndrome (CFS) is hypothesized to result in part from dysregulated sy…	2016	2016-10	Hall, K T; Kossowsky, J; Oberlander, T F; Kaptchuk, T J; Saul, J P; Wyller, V B; Fagermoen, E; Sulheim, D; Gjerstad, J; Winger, A; Mukamal, K J	The Pharmacogenomics Journal
Cognitive training for patients with dementia living in a sicilian nursing home: a novel web-based approach	Dementia is an increasing challenge for health care and social system in developed countries. Interventions with a cognitive focus, also using assistive technology, are leading to promising results in improving cognitive and behavior symptoms in individuals with dementia. Aim of our study was to evaluate the combined effects of the standard cognitive training in addition to web-based rehabilitati…	2016	2016-10	De Luca, Rosaria; Bramanti, Alessia; De Cola, Maria Cristina; Leonardi, Simona; Torrisi, Michele; Aragona, Bianca; Trifiletti, Antonino; Ferrara, Maria Danilo; Amante, Piero; Casella, Carmela; Bramanti, Placido; Calabrò, Rocco Salvatore	Neurological Sciences
Dietary saturated fat and monounsaturated fat have reversible effects on brain function and the secretion of pro-inflammatory cytokines in young women	BACKGROUND: Previous literature suggests that a higher ratio of palmitic acid (PA)/oleic acid (OA) in the diet induces inflammation, which may result in deficient brain insulin signaling, and, secondarily, impaired physical activity, sleep efficiency, and cognitive functioning. OBJECTIVE: We hypothesized that lowering the typical dietary PA/OA would affect the activation of relevant brain network…	2016	2016-10	Dumas, Julie A.; Bunn, Janice Y.; Nickerson, Joshua; Crain, Karen I.; Ebenstein, David B.; Tarleton, Emily K.; Makarewicz, Jenna; Poynter, Matthew E.; Kien, Craig Lawrence	Metabolism: Clinical and Experimental
What Constitutes High-Quality Implementation of SEL Programs? A Latent Class Analysis of Second Step Implementation	With the increased number of schools adopting social-emotional learning (SEL) programming, there is increased emphasis on the role of implementation in obtaining desired outcomes. Despite this, the current knowledge of the active ingredients of SEL programming is lacking, and there is a need to move from a focus on "whether" implementation matters to "what" aspects of implementation matter. To ad…	2016	2016-11	Low, Sabina; Smolkowski, Keith; Cook, Clay	Prevention Science
Short-Term Intervention Effects of the PATHS Curriculum in Young Low-Income Children: Capitalizing on Plasticity	Deficits in behavioral and cognitive regulation are prevalent in children reared in poverty relative to more affluent children due to the effects of adverse conditions on the developmental underpinnings of these skills. Despite evidence to suggest that these emergent processes are susceptible to environmental inputs, research documenting short-term intervention program influences on these regulat…	2016	2016-12	Fishbein, Diana H; Domitrovich, Celene; Williams, Jason; Gitukui, Stephanie; Guthrie, Charles; Shapiro, Daniel; Greenberg, Mark	Journal of Primary Prevention
Does a Self-Affirmation Intervention Reduce Stereotype Threat in Black and Hispanic High Schools?	The risk of confirming negative stereotypes about one's social group, known as stereotype threat, depresses academic achievement among students of color and contributes to racial gaps in achievement. Some work finds that stereotype threat may be alleviated through self-affirmation exercises, translating into improved performance among students vulnerable to threat. However, this work has been con…	2016	2016-12	Bratter, Jenifer L; Rowley, Kristie J; Chukhray, Irina	Race and Social Problems
Cognitive remediation for individuals with psychosis: efficacy and mechanisms of treatment effects	Background The popularity of cognitive remediation (CR) interventions for individuals with psychosis is in part based on the well-established link between cognition and functioning and the assumption that by targeting cognition, function can improve. While numerous trials have reported CR's efficacy, it is still not considered an evidence-based treatment. Importantly, little is known about the me…	2016	2016-12	Fiszdon, J M; Choi, K H; Bell, M D; Choi, J; Silverstein, S M	Psychological Medicine
How do tests and summary writing tasks enhance long-term retention of students with different levels of test anxiety?	Testing has been found to facilitate students' long-term retention of information. However, the learning performance of highly test-anxious students can be impaired by tests. Thus, these students may learn ineffectively in a testing context. By contrast, summary writing may not trigger test anxiety and is therefore another learning strategy to enhance students' retention. This study compared the …	2016	2016-12	Mok, Wilson Shun; Yin; Chan, Winnie Wai; Lan	Instructional Science
Using a Video Game as an Advance Organizer: Effects on Development of Procedural and Conceptual Knowledge, Cognitive Load, and Casual Adoption	This paper reports on a study aimed at investigating whether a video game can act as an advance organizer for teaching a military call for fire task in order to improve learning efficiency. Participants were 23 males and 45 females, randomly assigned to one of four conditions. Conditions were developed by a 2 x 2 matrix using video games with and without advance organizers to enhance decision-mak…	2013	2013-09	Vogel-Walcutt, Jennifer J; Katherine Del Giudice; Logan, Fiorella; Nicholson, Denise	Journal of Online Learning and Teaching
Promising Therapeutics with Natural Bioactive Compounds for Improving Learning and Memory - A Review of Randomized Trials	Cognitive disorders can be associated with brain trauma, neurodegenerative disease or as a part of physiological aging. Aging in humans is generally associated with deterioration of cognitive performance and, in particular, learning and memory. Different therapeutic approaches are available to treat cognitive impairment during physiological aging and neurodegenerative or psychiatric disorders. Tr…	2012	2012	Kumar, Hemant; More, Sandeep Vasant; Han, Sang-Don; Choi, Jin-Yong; Choi, Dong-Kug	Molecules
Stepped wedge cluster randomised trials: a review of the statistical methodology used and available	Background Previous reviews have focussed on the rationale for employing the stepped wedge design (SWD), the areas of research to which the design has been applied and the general characteristics of the design. However these did not focus on the statistical methods nor addressed the appropriateness of sample size methods used.This was a review of the literature of the statistical methodology used…	2016	2016	Barker, D; McElduff, P; DEste, C; Campbell, M J	BMC Medical Research Methodology
Neural correlates of cognitive improvements following cognitive remediation in schizophrenia: a systematic review of randomized trials	Background: Cognitive impairments are a core feature in schizophrenia and are linked to poor social functioning. Numerous studies have shown that cognitive remediation can enhance cognitive and functional abilities in patients with this pathology. The underlying mechanism of these behavioral improvements seems to be related to structural and functional changes in the brain. However, studies on ne…	2016	2016	Isaac, Clémence; Januel, Dominique	Socioaffective Neuroscience & Psychology
Effect of increasing dietary calcium through supplements and dairy food on body weight and body composition: a meta-analysis of randomised controlled trials	This meta-analysis of randomised controlled trials assessed the effect of Ca on body weight and body composition through supplementation or increasing dairy food intake. Forty-one studies met the inclusion criteria (including fifty-one trial arms; thirty-one with dairy foods (n 2091), twenty with Ca supplements (n 2711). Ca intake was approximately 900 mg/d higher in the supplement groups compare…	2015	2015-10-14	Booth, Alison O; Huggins, Catherine E; Wattanapenpaiboon, Naiyana; Nowson, Caryl A	The British Journal of Nutrition
Acute aerobic exercise and information processing: Modulation of executive control in a Random Number Generation task	The immediate and short-term aftereffects of a bout of aerobic exercise on young adults' executive functions were assessed. Sixteen participants performed a Random Number Generation (RNG) task, which measured two aspects of executive function, before, during, and after ergometer cycling exercise. In a separate session, participants completed the same sequence of testing while seated on an ergomet…	2009	2009-09	Audiffren, Michel; Tomporowski, Phillip D.; Zagrodnik, James	Acta Psychologica
Aerobic exercise and neurocognitive performance: a meta-analytic review of randomized controlled trials	OBJECTIVES: To assess the effects of aerobic exercise training on neurocognitive performance. Although the effects of exercise on neurocognition have been the subject of several previous reviews and meta-analyses, they have been hampered by methodological shortcomings and are now outdated as a result of the recent publication of several large-scale, randomized, controlled trials (RCTs). METHODS: …	2010	2010-04	Smith, Patrick J.; Blumenthal, James A.; Hoffman, Benson M.; Cooper, Harris; Strauman, Timothy A.; Welsh-Bohmer, Kathleen; Browndyke, Jeffrey N.; Sherwood, Andrew	Psychosomatic Medicine
Probability theory and perception of randomness: Bridging "oughta[euro] and "isa[euro]	Abstract We argue that approaches adhering to normative systems can be as fruitful as those by descriptive systems. In measuring people's perception of randomness, discrepancies between human behavior and normative models could have resulted from unknown properties of the models, and it does not necessarily lead to the conclusion that people are irrational or that the normative system has to be a…	2011	2011-10	Sun, Yanlong; Wang, Hongbin	Behavioral and Brain Sciences
Systematic review of strengths and limitations of Randomized Controlled Trials for non-pharmacological interventions in mild cognitive impairment: Focus on Alzheimer's disease	Non-pharmacological interventions may improve cognition and quality of life, reduce disruptive behaviors, slow progression from Mild Cognitive Impairment (MCI) to dementia, and delay institutionalization. It is important to look at their trial designs as well as outcomes to understand the state of the evidence supporting non-pharmacological interventions in Alzheimer's disease (AD). An analysis o…	2015	2015-02	Horr, T; Messinger-rapport, B; Pillai, Jagan A	The Journal of Nutrition, Health & Aging
A Meta-analytic Review of Non-specific Effects in Randomized Controlled Trials of Cognitive Remediation for Schizophrenia	Cognitive remediation (CR) has been found to improve cognitive performance among adults with schizophrenia in randomized controlled trials (RCTs). However, improvements in cognitive performance are often observed in the control groups of RCTs as well. There has been no comprehensive examination of change in control groups for CR, which may inform trial methodology and improve our understanding of…	2016	2016-03	Radhakrishnan, Rajiv; Kiluk, Brian D; Tsai, Jack	Psychiatric Quarterly
Effects of motor-cognitive coordination training and cardiovascular training on motor coordination and cognitive functions	Objectives: Numerous recent studies showed that physical training can enhance cognitive abilities, such as attention, spatial ability, memory performance, and executive functions. However, most of these studies focused on the efficiency of cardiovascular training, whereas evidence for combined motor cognitive training emphasizing coordination abilities is scarce. Therefore, the aim of the present…	2016	2016-05	Johann, Verena E.; Stenger, Katharina; Kersten, Stephanie; Karbach, Julia	Psychology of Sport and Exercise
Subthalamic nucleus gamma oscillations mediate a switch from automatic to controlled processing: A study of random number generation in Parkinson's disease	In paced random number generation (RNG) participants are asked to generate numbers between 1 and 9 in a random fashion, in synchrony with a pacing stimulus. Successful task performance can be achieved through control of the main biases known to exist in human RNG compared to a computer generated series: seriation, cycling through a set of available numbers, and repetition avoidance. A role in res…	2013	2013-01-01	Anzak, Anam; Gaynor, Louise; Beigi, Mazda; Foltynie, Thomas; Limousin, Patricia; Zrinzo, Ludvic; Brown, Peter; Jahanshahi, Marjan	NeuroImage
Adaptive force produced by stress-induced regulation of random variation intensity	The Darwinian theory of life evolution is capable of explaining the majority of related phenomena. At the same time, the mechanisms of optimizing traits beneficial to a population as a whole but not directly to an individual remain largely unclear. There are also significant problems with explaining the phenomenon of punctuated equilibrium. From another perspective, multiple mechanisms for the re…	2010	2010-08	Shimansky, Yury P	Biological Cybernetics
Cognitive tests used in chronic adult human randomised controlled trial micronutrient and phytochemical intervention studies	In recent years there has been a rapid growth of interest in exploring the relationship between nutritional therapies and the maintenance of cognitive function in adulthood. Emerging evidence reveals an increasingly complex picture with respect to the benefits of various food constituents on learning, memory and psychomotor function in adults. However, to date, there has been little consensus in …	2010	2010-12	Macready, Anna L; Butler, Laurie T; Kennedy, Orla B; Ellis, Judi A; Williams, Claire M; Spencer, Jeremy P E	Nutrition Research Reviews
The clinical significance of cognition-focused interventions for cognitively impaired older adults: a systematic review of randomized controlled trials	ABSTRACT Background: Cognitive stimulation, training or rehabilitation can achieve modest, skill-specific gains in cognitively healthy older adults. With regard to the limited efficacy of currently available anti-dementia drugs it is crucial to investigate whether such treatments also provide clinically meaningful benefits to cognitively impaired older individuals. Methods: We conducted a systema…	2011	2011-11	Kurz, Alexander F; Leucht, Stefan; Lautenschlager, Nicola T	International Psychogeriatrics
Selective Effect of Physical Fatigue on Motor Imagery Accuracy	While the use of motor imagery (the mental representation of an action without overt execution) during actual training sessions is usually recommended, experimental studies examining the effect of physical fatigue on subsequent motor imagery performance are sparse and yielded divergent findings. Here, we investigated whether physical fatigue occurring during an intense sport training session affe…	2012	2012-10	Rienzo, Franck Di; Collet, Christian; Hoyek, Nady; Guillot, Aymeric	PLoS One
Nonpharmacological Interventions for ADHD: Systematic Review and Meta-Analyses of Randomized Controlled Trials of Dietary and Psychological Treatments	Objective Nonpharmacological treatments are available for attention deficit hyperactivity disorder (ADHD), although their efficacy remains uncertain. The authors undertook meta-analyses of the efficacy of dietary (restricted elimination diets, artificial food color exclusions, and free fatty acid supplementation) and psychological (cognitive training, neurofeedback, and behavioral interventions) …	2013	2013-03	Sonuga-Barke, Edmund JS; Brandeis, Daniel; Cortese, Samuele; Daley, David; Ferrin, Maite; Holtmann, Martin; Stevenson, Jim; Danckaerts, Marina; van der Oord, Saskia; Döpfner, Manfred; Dittmann, Ralf W; Simonoff, Emily; Zuddas, Alessandro; Banaschewski, Tobias; Buitelaar, Jan; Coghill, David; Hollis, Chris; Konofal, Eric; Lecendreux, Michel; Wong, Ian CK; Sergeant, Joseph	The American Journal of Psychiatry
Random walks on the mental number line	The direction of influence between conceptual and motor activation, and its relevance for real-life activities, is still unclear. Here, we use the frequently reported association between small/large numbers and left/right space to investigate this issue during walking. We asked healthy adults to generate random numbers as they made lateral turns and found that (1) lateral turn decisions are predi…	2014	2014-01	Shaki, Samuel; Fischer, Martin H	Experimental Brain Research
Effect of Expressive Writing Intervention on Health Outcomes in Breast Cancer Patients: A Systematic Review and Meta-Analysis of Randomized Controlled Trials	Background Numerous randomized controlled trials (RCTs) have arrived at conflicting conclusions on expressive writing (EW) as an intervention for breast cancer (BC) patients, but there has been no meta-analysis of these studies to assess the effectiveness of EW in BC population. Methods PubMed, Web of Science, The Cochrane Library, EMBASE, and CINAHL and the www.clinicaltrial.gov database on ongo…	2015	2015-07	Zhou, Chunlan; Wu, Yanni; An, Shengli; Li, Xiaojin	PLoS One
An implicit basis for the retention benefits of random practice	The cognitive effort explanations of contextual interference (CI) and implicit motor learning represent a paradox in which cognitive involvement is seen to be advantageous or disadvantageous for learning. The authors aimed to resolve this paradox by measuring cognitive effort and working memory dependence during low and high CI practice on two Australian Rules Football tasks (kicking and handball…	2011	2011	Rendell, Megan A.; Masters, Rich S. W.; Farrow, Damian; Morris, Tony	Journal of Motor Behavior
Health and aging in elderly farmers: the AMI cohort	Doc number: 558 Abstract Background: The health of the agricultural population has been previously explored, particularly in relation to the farming exposures and among professionally active individuals. However, few studies specifically focused on health and aging among elders retired from agriculture. Yet, this population faces the long-term effects of occupational exposures and multiple diffic…	2012	2012	Pérès, Karine; Matharan, Fanny; Allard, Michèle; Amieva, Hélène; Baldi, Isabelle; Barberger-Gateau, Pascale; Bergua, Valérie; Bourdel-Marchasson, Isabelle; Delcourt, Cécile; Foubert-Samier, Alexandra; Fourrier-Réglat, Annie; Gaimard, Maryse; Laberon, Sonia; Maubaret, Cécilia; Postal, Virginie; Chantal, Chantal; Rainfray, Muriel; Rascle, Nicole; Dartigues, Jean-François	BMC Public Health
Physical Activity, Academic Performance and Cognition in Children and Adolescents. A Systematic Review	Physical Activity, Academic Performance and Cognition in Children and Adolescents. A Systematic Review A literature review was conducted to investigate the effect of physical exercise and physical training on cognition and academic performance in children and adolescents. Nine randomized or quasi-randomized controlled trials with 2,013 participants were identified by employing the following data …	2012	2012	Haapala, Eero	Baltic Journal of Health and Physical Activity
Physical Activity and Brain Function in Older Adults at Increased Risk for Alzheimer's Disease	Leisure-time physical activity (PA) and exercise training are known to help maintain cognitive function in healthy older adults. However, relatively little is known about the effects of PA on cognitive function or brain function in those at increased risk for Alzheimer's disease through the presence of the apolipoproteinE epsilon4 (APOE-[straight epsilon]4) allele, diagnosis of mild cognitive imp…	2013	2013	Smith, J Carson; Nielson, Kristy A; Woodard, John L; Seidenberg, Michael; Rao, Stephen M	Brain Sciences
Advances in the Research of Melatonin in Autism Spectrum Disorders: Literature Review and New Perspectives	Abnormalities in melatonin physiology may be involved or closely linked to the pathophysiology and behavioral expression of autistic disorder, given its role in neurodevelopment and reports of sleep-wake rhythm disturbances, decreased nocturnal melatonin production, and beneficial therapeutic effects of melatonin in individuals with autism. In addition, melatonin, as a pineal gland hormone produc…	2013	2013	Tordjman, Sylvie; Najjar, Imen; Bellissant, Eric; Anderson, George M; Barburoth, Marianne; Cohen, David; Jaafari, Nemat; Schischmanoff, Olivier; Fagard, Remi; Lagdas, Enas; Kermarrec, Solenn; Ribardiere, Sophie; Botbol, Michel; Fougerou, Claire; Bronsard, Guillaume; Vernay-Leconte, Julie	International Journal of Molecular Sciences
Training for Success in a Child with ADHD	This article presents a case study to illustrate how children with attention-deficit/hyperactivity disorder (ADHD) can be assessed and successfully trained using neurofeedback. There is established efficacy for using neurofeedback to treat ADHD (Arns, De Ridder, Strehl, Breteler, & Coenen, 2009; Gani, Birbaumer, & Strehl, 2009; Gevensleben et al., 2009). Indeed, the American Academy of Pediatrics…	2013	2013	Santhirasegaram, Lena, BSc; Thompson, Lynda, PhD; Reid, Andrea, MA, CCC; Thompson, Michael, MD	Biofeedback (Online)
Outcomes of neuropsychological interventions of stroke	The reported prevalence of cognitive deficits within the first month of stroke ranges widely from 10% to 82%, depending primarily on the criteria used to define cognitive impairment and on the selected patient population. These cognitive defects progress toward impairment over a course of time if left untreated. Among the most common cognitive deficits are the attentional, the visuoperceptual, th…	2013	2013	Xu, Xiao-Di; Ren, Hong-Yan; Prakash, Ravi; Vijayadas; Kumar, Rajesh	Annals of Indian Academy of Neurology
Timing perception and motor coordination on rope jumping in children with attention deficit hyperactivity disorder	Objectives To evaluate timing perception ability and motor coordination in children with ADHD (Attention Deficit Hyperactivity Disorder) while rope jumping at different rates. Design and setting Rope jumping at (1) a constant tempo of 100 for 15 s (RJ-C) and (2) two randomly permutated tempos (80, 100, or 120) for 15 s (RJ-V). Main Outcome Measures The "timing variation while jumping", "timing va…	2013	2013	Chen, Ying-Yi; Liaw, Lih-Jiun; Liang, Jing-Min; Hung, Wei-Tso; Guo, Lan-Yuen; Wu, Wen-Lan	Physical Therapy in Sport
Develop and Evaluate the Effects of Multimodal Presentation System on Elementary ESL Students	The purpose of this study is to develop and evaluate the effects of multimodal presentation system (MPS), a multimodal presentation software integrated with interactive whiteboard (IWB), on student learning in the elementary English as second language (ESL) course. It focuses primarily on techniques and tools to enhance the students ESL learning achievement and learning satisfaction in the classr…	2013	2013	Fang-O Kuo; Pao-Ta Yu; Wei-Hung, Hsiao	TOJET : The Turkish Online Journal of Educational Technology
Diagnosing Mild Cognitive Impairment (MCI) in clinical trials: a systematic review	Objective To describe how criteria for amnestic Mild Cognitive Impairment (aMCI) have been operationalised in randomised controlled clinical trials (RCTs). Design Systematic review. Information sources EMBASE, PubMed and PSYCHInfo were searched from their inception to February 2012. Electronic clinical trial registries were also searched (February 2012). Study selection RCTs were included where p…	2013	2013	Christa Maree Stephan, Blossom; Minett, Thais; Pagett, Emma; Siervo, Mario; Brayne, Carol; McKeith, Ian G	BMJ Open
Associations between lifestyle and cognitive function over time in women aged 40–79 years	Background: Smoking, excessive drinking, and physical inactivity are associated with reduced cognitive function but the independence, domain specific cognitive effects, and trajectories of these associations are not firmly established. Objective: Our aim was to examine these lifestyle-cognitive function associations in middle-to-older aged women across time. Methods: Cohort study design with repe…	2014	2014	Lo, Ada H. Y.; Woodman, Richard J.; Pachana, Nancy A.; Byrne, Gerard J.; Sachdev, Perminder S.	Journal of Alzheimer's Disease
The Dopaminergic Reward System and Leisure Time Exercise Behavior: A Candidate Allele Study	Purpose. Twin studies provide evidence that genetic influences contribute strongly to individual differences in exercise behavior. We hypothesize that part of this heritability is explained by genetic variation in the dopaminergic reward system. Eight single nucleotide polymorphisms (SNPs in DRD1: rs265981, DRD2: rs6275, rs1800497, DRD3: rs6280, DRD4: rs1800955, DBH: rs1611115, rs2519152, and in …	2014	2014	Huppertz, Charlotte; Bartels, Meike; Groen-Blokhuis, Maria M; Dolan, Conor V; Marleen H. M. de Moor; Abdellaoui, Abdel; Catharina E. M. van Beijsterveldt; Ehli, Erik A; Jouke-Jan Hottenga; Willemsen, Gonneke; Xiao, Xiangjun; Scheet, Paul; Davies, Gareth E	BioMed Research International
The Effect of Different Types of Walking on Dual-Task Performance and Task Prioritization among Community-Dwelling Older Adults	Background. The ability to safely conduct different types of walking concurrently with a cognitive task (i.e., dual task) is crucial for daily life. The contribution of different walking types to dual-task performance has not yet been determined, nor is there agreement on the strategies that older adults use to divide their attention between two tasks (task prioritization). Objectives. To compare…	2014	2014	Agmon, Maayan; Kodesh, Einat; Kizony, Rachel	The Scientific World Journal
THE LEARNING BRAIN: MEMORY AND BRAIN DEVELOPMENT IN CHILDREN	[...]I present a few examples of work that I believe is already taking these next steps and that can serve as models for future research in the field of educational neuroscience. [...]growth factors are known to increase cell formation in the brain's hippocampus, which is involved in long-term memory functions.\n The result is a modified Classroom Pivotal Response Training intervention cocreated …	2014	2014	Edwards, Laura A	Harvard Educational Review
Detecting number processing and mental calculation in patients with disorders of consciousness using a hybrid brain-computer interface system	Background For patients with disorders of consciousness such as coma, a vegetative state or a minimally conscious state, one challenge is to detect and assess the residual cognitive functions in their brains. Number processing and mental calculation are important brain functions but are difficult to detect in patients with disorders of consciousness using motor response-based clinical assessment …	2015	2015	Li, Yuanqing; Pan, Jiahui; He, Yanbin; Wang, Fei; Laureys, Steven; Xie, Qiuyou; Yu, Ronghao	BMC Neurology
Using Cognitive Load Theory to Tailor Instruction to Levels of Accounting Students' Expertise	Tailoring of instructional methods to learner levels of expertise may reduce extraneous cognitive load and improve learning. Contemporary technology-based learning environments have the potential to substantially enable learner-adapted instruction. This paper investigates the effects of adaptive instruction based on using the isolated-interactive elements effect that occurs when learners who are …	2015	2015	Blayney, Paul; Kalyuga, Slava; Sweller, John	Journal of Educational Technology & Society
[truncated: 6,756 more rows]
[truncated: 47 more columns]

## Sheet: Screen 2_PA
Title	Abstract Note	Publication Year	Date	Author	Publication Title
[truncated: 554 more rows]

## Sheet: Screen 3_WM+Characteristics
Title	Abstract Note	Publication Year	Date	Author	Publication Title
[truncated: 151 more rows]
